# Supplementary material for: Inverse Regulation of Inflammation and Mitochondrial Function in Adipose Tissue Defines Extreme Insulin Sensitivity in Morbidly Obese Patients
Source: Oxford University Press journal article supplement (doi:10.2337/db12-0399), 2012-12-07
Supplement: db120399-sup-suppl_table_1_rygb_genelist1_omental_968.xls [file db120399-sup-suppl_table_1_rygb_genelist1_omental_968.xls]

## Sheet: Omeantal_968
Row	ProbeID	Transcript	Gene Symbol	Avgeraged LogInten	top 10% vs. bottom 10%			top 15% vs. bottom 15%			top 20% vs. bottom 20%			Pearson		Spearman
					ANOVA p-value	K-Wallis p-value	Fold Change	ANOVA p-value	K-Wallis p-value	Fold Change	ANOVA p-value	K-Wallis p-value	Fold Change	Corr Coeff	p-value	Corre Coeff	p-value
1	10020272110	RSE_00000246951		3.40251	0.00175816	0.000519753	1.11195	0.000652015	0.000214398	1.09407	0.00187248	0.000811338	1.07568	0.227362	0.0003243	0.257046	4.50674e-05
2	10023804644	Contig48774_RC	POU2F2	2.36229	0.0169616	0.0213439	1.19856	0.00323516	0.00458777	1.18572	0.00130838	0.00180292	1.17825	0.187211	0.00314214	0.197203	0.00184439
3	10023804676	AF055029		3.51203	0.104809	0.0980809	1.07755	0.0587057	0.0407625	1.08044	0.00382709	0.00249767	1.1051	0.180666	0.00439306	0.180662	0.00439409
4	10023804691	NM_005160	ADRBK2	3.49208	9.76324e-05	5.83529e-05	0.751522	0.000291705	0.000172615	0.805916	0.00853425	0.00281006	0.869288	-0.209529	0.000922509	-0.227112	0.00032022
5	10023804727	Contig16654_RC	TRAF3IP3	2.66888	0.556835	0.53099	1.02729	0.0995652	0.0886915	1.06296	0.0066067	0.00757801	1.09046	0.165014	0.00937457	0.178018	0.00501551
6	10023804739	NM_016650	MS4A4A	3.93316	2.83122e-05	0.000160635	1.53874	0.000919759	0.0010733	1.35139	0.00558603	0.00499755	1.25666	0.224468	0.00105538	0.222052	0.00119877
7	10023804780	NM_002664	PLEK	3.5	2.90871e-05	9.84669e-05	1.5348	0.000723958	0.00117344	1.36683	0.00333792	0.00193244	1.279	0.251491	0.000115533	0.232029	0.000387781
8	10023804837	NM_014325	CORO1C	3.22156	0.00464618	0.00978267	1.16908	0.00173038	0.00313485	1.15194	0.00034672	0.000983298	1.15349	0.206563	0.00120205	0.237143	0.000190732
9	10023804938	NM_002314	LIMK1	2.90861	0.0766703	0.118363	1.14489	0.0180886	0.0198939	1.1474	0.00204217	0.00138843	1.16766	0.174361	0.00713002	0.176839	0.00634202
10	10023805159	NM_005461	MAFB	4.64269	0.000479221	0.000850677	1.30788	6.61016e-05	0.000157654	1.2707	0.000110805	0.000207961	1.22662	0.230411	0.000368967	0.231942	0.00033622
11	10023805232	NM_004121	GGT5	4.05912	0.00407362	0.011667	0.9007	0.0025143	0.00727868	0.914603	0.00675261	0.0185689	0.93363	-0.187221	0.00513304	-0.19123	0.00424158
12	10023805284	Contig51486_RC	KITLG	3.34494	0.0827667	0.0810614	0.846341	0.0405921	0.0451907	0.852062	0.0034501	0.00491989	0.824428	-0.199142	0.0019346	-0.196028	0.0022835
13	10023805743	Contig48769_RC	COL6A6	2.8367	0.00222224	0.00560838	0.687545	0.000817418	0.00230223	0.706919	0.0006845	0.000874221	0.728651	-0.21501	0.000686507	-0.23317	0.00022471
14	10023805829	NM_002047	GARS	4.24376	0.0778809	0.0582401	1.07877	0.0372321	0.0251707	1.07254	0.00636429	0.00347519	1.08223	0.210571	0.00205295	0.246945	0.000282651
15	10023805997	NM_014481	APEX2	3.56161	0.00717461	0.0163773	1.11163	0.00595051	0.0161659	1.09069	0.00427973	0.00591886	1.09092	0.173919	0.00613648	0.1679	0.00818903
16	10023806023	NM_019027	RBM47	3.41958	0.00376278	0.000849485	1.21544	0.00162727	0.00119001	1.19781	0.000470936	0.000186265	1.20169	0.184523	0.00529109	0.223273	0.000703409
17	10023806164	Contig40889_RC	SHC4	2.23807	0.000754952	0.00264907	0.776905	7.65324e-05	0.000282168	0.781734	0.00122279	0.00093174	0.835666	-0.223051	0.000411884	-0.207093	0.00106121
18	10023806210	NM_005766	FARP1	3.59593	0.00129962	0.00151133	1.14777	3.75509e-06	7.03335e-06	1.17912	5.96046e-08	2.38419e-07	1.18055	0.283832	9.91188e-06	0.327413	2.82733e-07
19	10023806230	NM_016524	SYT17	2.93599	0.000538349	0.001652	0.687884	0.000450313	0.00183469	0.749153	0.000330567	0.00151056	0.778465	-0.307733	9.02164e-07	-0.251979	6.64984e-05
20	10023806288	Contig52358_RC		2.35256	0.00504577	0.00455636	0.898817	0.0011307	0.00137895	0.889584	0.00314367	0.00590992	0.916515	-0.167715	0.00839379	-0.183332	0.00391042
21	10023806537	NM_000698	ALOX5	3.52552	0.00456137	0.0039885	1.39822	0.00117838	0.00152218	1.34391	0.00295311	0.00143516	1.27991	0.209318	0.000956665	0.233522	0.0002197
22	10023806602	AK000001	FAM125B	3.66474	0.0459958	0.0627463	1.11159	0.010826	0.0132619	1.11264	0.000400484	0.000622809	1.14039	0.211342	0.000851036	0.198519	0.00175405
23	10023806624	NM_001063	TF	3.74052	0.000510037	0.00111729	0.521605	0.00027281	0.000721514	0.579714	0.000399113	0.000655234	0.637	-0.245045	9.97751e-05	-0.23911	0.000148221
24	10023806681	Contig27300_RC		2.92904	0.00325918	0.00142866	0.906459	0.0069561	0.00518042	0.93334	0.0239084	0.0199522	0.949588	-0.167474	0.00835535	-0.173112	0.00638188
25	10023806682	Contig34725_RC	KCTD4	2.59736	0.0154741	0.00566721	0.916009	0.0055539	0.00226349	0.92076	0.00266421	0.0015654	0.925955	-0.172655	0.00663528	-0.204066	0.00128958
26	10023806773	NM_006005	WFS1	3.76929	0.172928	0.116471	1.09353	0.0317511	0.0235379	1.12254	0.00613278	0.00670242	1.13959	0.208291	0.00099075	0.1939	0.00220587
27	10023806807	NM_004281	BAG3	3.98191	0.0035848	0.00264907	1.26605	0.00247401	0.00207037	1.20929	0.0010742	0.000544667	1.19227	0.264095	2.71899e-05	0.251909	6.45466e-05
28	10023806944	NM_002133	HMOX1	4.23313	1.19209e-07	4.76837e-07	1.53432	5.36442e-07	3.57628e-07	1.42796	1.86563e-05	1.07288e-06	1.36244	0.306744	3.73851e-06	0.352938	8.01377e-08
29	10023807107	NM_018638	ETNK1	2.9837	0.00451547	0.00701678	1.2109	0.00983626	0.019146	1.15057	0.00695842	0.0114121	1.14227	0.191834	0.00256654	0.189593	0.00288731
30	10023807118	NM_001978	EPB49	3.37714	0.0272264	0.0351143	1.15325	0.0101764	0.0148448	1.13995	0.000294268	0.000476301	1.17095	0.213592	0.00114532	0.208087	0.00154323
31	10023807236	Contig30343_RC		3.28406	0.00595039	0.00348568	0.835926	0.000212848	0.000157118	0.825148	0.00117552	0.0010584	0.866341	-0.215284	0.000658452	-0.202871	0.00134782
32	10023807243	NM_014751	MTSS1	3.94628	0.0083819	0.00839037	1.27669	0.0048036	0.00477922	1.23804	0.00218046	0.00181949	1.21795	0.222516	0.000695198	0.225535	0.000584532
33	10023807346	AB014574	FKBP15	3.72807	0.0480827	0.0689904	1.09189	0.0156963	0.0319732	1.08457	0.000564992	0.00195163	1.1079	0.200808	0.00176859	0.180511	0.00503262
34	10023807355	Contig46015_RC	CALCRL	2.9416	0.0202371	0.084595	0.845508	0.00992799	0.0407625	0.866603	0.00116205	0.00757801	0.835408	-0.171007	0.00706369	-0.170161	0.00735553
35	10023807382	NM_000129	F13A1	4.85434	0.00070101	0.00199992	1.58871	0.00109559	0.00169414	1.46071	0.000876904	0.00180358	1.38025	0.241465	0.000148748	0.200286	0.00173984
36	10023807428	NM_003900	SQSTM1	5.11065	0.052982	0.0391592	1.15369	0.0063495	0.00164956	1.17584	0.019584	0.00894922	1.12569	0.189006	0.00286067	0.189896	0.00272987
37	10023807436	AL050125	XYLT1	3.16144	0.010058	0.0170181	1.24838	0.023544	0.0437735	1.16706	0.00319821	0.00659865	1.18208	0.221558	0.000476361	0.18718	0.00327281
38	10023807540	NM_004267	CHST2	3.30093	0.0240663	0.0299572	1.17585	0.00420153	0.00789434	1.19985	0.00297332	0.00353372	1.17527	0.204717	0.00153209	0.183373	0.00462409
39	10023807545	NM_020183	ARNTL2	2.53057	0.0108445	0.0140216	0.925828	0.0143055	0.0145177	0.944479	0.00485492	0.00649828	0.941028	-0.17869	0.00485061	-0.188196	0.0029847
40	10023807635	NM_003366	UQCRC2	4.47717	0.00220603	0.0039885	0.874384	0.000726104	0.00225526	0.891714	0.000673175	0.00178164	0.898072	-0.205408	0.00151041	-0.20216	0.00179967
41	10023807728	Contig33834_RC		2.5715	0.00533193	0.00264907	1.17723	0.00702679	0.011921	1.14675	0.00600308	0.00680667	1.12637	0.196746	0.00189101	0.171211	0.00699495
42	10023807860	NM_005139	ANXA3	3.99219	0.0612146	0.0796397	0.773631	0.0130276	0.0158151	0.769834	0.00524616	0.00807172	0.785924	-0.221998	0.000476542	-0.193293	0.00242548
43	10023807884	NM_001725	BPI	2.54208	0.000578344	0.000547647	1.5826	0.0026567	0.00173986	1.39749	0.0106636	0.00819641	1.29786	0.198995	0.0017089	0.165902	0.00913649
44	10023807964	NM_002068	GNA15	3.20213	0.000131309	0.000244975	1.29771	4.47035e-05	6.17504e-05	1.24048	3.41535e-05	1.20997e-05	1.23226	0.251156	6.56921e-05	0.276131	1.0645e-05
45	10023808029	NM_000610	CD44	3.65845	0.0192517	0.0163773	1.20584	0.00240338	0.00271195	1.19327	0.00157022	0.00156754	1.174	0.173234	0.00634422	0.201366	0.00146612
46	10023808047	NM_004758	BZRAP1	2.99137	0.00213718	0.000640035	0.811322	0.00522721	0.00214845	0.862069	0.0429161	0.0181234	0.909711	-0.183449	0.00388729	-0.184188	0.00374347
47	10023808082	Contig43833_RC	GXYLT2	3.38686	0.0178802	0.0205624	0.845038	0.00972819	0.00722545	0.855153	0.00828916	0.0125525	0.861616	-0.200505	0.00153794	-0.200053	0.00157692
48	10023808107	NM_018663	PXMP2	3.71496	0.00448286	0.00542724	0.802028	0.00706679	0.00811553	0.838617	0.000873208	0.00146079	0.836251	-0.18519	0.00348871	-0.186713	0.00322455
49	10023808114	NM_000211	ITGB2	3.85663	0.0174177	0.00911111	1.31083	0.00628334	0.00276506	1.28676	0.00293255	0.0013361	1.26798	0.200116	0.00224333	0.235278	0.000309417
50	10023808169	NM_014005	PCDHA9	2.6519	0.00609797	0.00417024	0.900945	0.0144705	0.0110801	0.920892	0.0497524	0.0306372	0.941945	-0.164995	0.0095295	-0.192468	0.00243131
51	10023808351	NM_002851	PTPRZ1	2.94102	0.0311009	0.0145806	0.870548	0.00186324	0.00130492	0.843361	0.00149983	0.000907302	0.866642	-0.19566	0.00204902	-0.225432	0.000365612
52	10023808397	NM_018389	SLC35C1	3.81297	0.0111707	0.0110478	1.19462	0.00227851	0.00183469	1.17854	0.000709951	0.000422776	1.17187	0.256138	4.63586e-05	0.251488	6.42001e-05
53	10023808408	NM_001124	ADM	4.80713	0.000613868	0.00179231	1.57048	0.00263995	0.00345558	1.36747	0.00429422	0.00325203	1.2887	0.233799	0.000443636	0.196766	0.0032396
54	10023808427	NM_005731	ARPC2	4.93605	0.000317812	0.00142866	1.21788	0.000365078	0.00278228	1.16405	0.000810683	0.00444937	1.1386	0.230156	0.000264352	0.207974	0.00100896
55	10023808444	NM_004666	VNN1	2.64696	0.000871003	0.00117403	1.37474	0.00765812	0.0101953	1.24314	0.00851512	0.0136824	1.20512	0.203651	0.00129006	0.203597	0.00129397
56	10023808531	NM_013363	PCOLCE2	4.12437	0.000871897	0.000219345	1.27992	0.0174261	0.0109056	1.15577	0.0547096	0.0564731	1.11799	0.172562	0.006554	0.169124	0.0077282
57	10023808555	Contig47555_RC	PTPN3	2.71364	9.53674e-06	1.5974e-05	0.813741	6.04987e-05	0.000107408	0.86218	0.000336945	0.000719428	0.890387	-0.271516	1.51062e-05	-0.26225	2.99348e-05
58	10023808601	Contig29647_RC	LFNG	3.7999	0.0180228	0.0350353	1.19859	0.00500649	0.00791705	1.18395	0.00283402	0.00580758	1.16891	0.225586	0.000440424	0.198099	0.00209071
59	10023808638	NM_004877	GMFG	3.86401	0.000547171	0.000709474	1.23727	0.00706393	0.0101953	1.14195	0.0510015	0.0161546	1.10269	0.179179	0.00499669	0.200683	0.00162834
60	10023808657	NM_001934	DLX4	2.75145	0.13144	0.0952547	1.05609	0.0293902	0.013901	1.06886	0.00999379	0.00993317	1.07551	0.187624	0.00307525	0.179647	0.00462392
61	10023808702	Contig58279_RC		3.55529	0.0147557	0.018699	1.13284	0.00375307	0.00306767	1.13277	0.00167078	0.00129348	1.12739	0.190386	0.0028841	0.195547	0.00219734
62	10023808893	AL109695	SLCO3A1	2.69085	0.0785879	0.0546405	1.07943	0.0112742	0.00889695	1.08737	0.00628746	0.00746322	1.08443	0.165429	0.00919529	0.166361	0.00880378
63	10023808896	NM_000528	MAN2B1	3.82619	0.0949348	0.126631	1.0635	0.025105	0.0127367	1.06753	0.00193489	0.000348032	1.08337	0.174108	0.00608019	0.204945	0.00119918
64	10023808901	Contig55046_RC	MXRA7	3.9335	0.022815	0.0256511	1.14752	0.0103663	0.0104273	1.138	0.00549221	0.00680667	1.13135	0.165179	0.00930318	0.17488	0.00585508
65	10023808951	NM_016184	CLEC4A	3.31037	0.000475168	0.00101137	1.32941	0.0037477	0.00481701	1.20798	0.0481051	0.0305111	1.12853	0.182644	0.00397445	0.169427	0.00761767
66	10023809017	NM_016932	SIX2	2.90711	0.0364846	0.0125695	1.1231	0.0126614	0.00348699	1.13956	0.00118268	0.000262678	1.15996	0.171189	0.00735912	0.206688	0.00116575
67	10023809166	NM_001919	DCI	3.96758	0.0571101	0.0903123	0.879528	0.0292979	0.0568092	0.885729	0.0015586	0.00244254	0.865873	-0.171399	0.00778704	-0.174823	0.00662473
68	10023809174	NM_001158	AOC2	3.17521	0.00661546	0.0130899	1.23786	0.00618553	0.00754613	1.20638	0.000946403	0.00102115	1.22402	0.2051	0.00133541	0.1777	0.00556884
69	10023809230	Contig61815	CALHM2	2.51318	0.00642091	0.0124563	1.23513	0.00551766	0.0148349	1.17466	0.00369912	0.00397354	1.16265	0.195297	0.00204576	0.189668	0.00276289
70	10023809242	NM_000540	RYR1	2.46876	0.00487018	0.00455636	1.1074	0.000884593	0.000662386	1.1047	0.000103593	8.69632e-05	1.10072	0.219151	0.000536333	0.254047	5.5633e-05
71	10023809537	Contig30101_RC	ACACA	2.36852	0.553541	0.356452	1.02427	0.10384	0.0439358	1.05028	0.00583589	0.00126713	1.0713	0.190253	0.00267898	0.219582	0.000508929
72	10023809557	NM_002775	HTRA1	4.89026	0.0406469	0.0419415	1.13427	0.00991064	0.0176221	1.12962	0.00112575	0.00214803	1.15088	0.1678	0.00836024	0.183924	0.00379417
73	10023809558	NM_002298	LCP1	4.28534	0.000810862	0.000945866	1.42725	0.000695467	0.00114095	1.35748	0.000885427	0.000586569	1.30185	0.245352	0.000135815	0.269566	2.5981e-05
74	10023809559	NM_000131	F7	2.86383	0.00390512	0.00519645	0.854986	0.00235009	0.00376618	0.863965	0.00285828	0.00310588	0.888398	-0.165769	0.00933786	-0.186762	0.00334412
75	10023809579	NM_003768	PEA15	3.79878	0.000644743	0.00111729	1.31552	0.00208044	0.0021835	1.21181	0.0131428	0.0175823	1.15	0.215063	0.000720134	0.17789	0.00532441
76	10023809584	NM_004193	GBF1	3.74012	0.00433314	0.0135949	1.14533	0.00892723	0.0115483	1.11666	0.000683129	0.00135541	1.1323	0.18966	0.00396972	0.180562	0.00614376
77	10023809844	Contig47297_RC		3.48914	0.130733	0.175887	1.1264	0.0354385	0.0569345	1.13425	0.00421888	0.00590599	1.1629	0.178892	0.00585376	0.173543	0.00753634
78	10023809856	NM_005565	LCP2	3.19096	0.0103157	0.0198146	1.21673	0.00186431	0.00438631	1.20649	0.00387657	0.00276107	1.17585	0.200015	0.0019732	0.228703	0.000386142
79	10023810057	NM_002193	INHBB	4.37605	0.00316769	0.00310767	1.34152	0.000252128	0.000412941	1.33685	0.000438213	0.000900447	1.28622	0.269011	2.59885e-05	0.251746	8.61106e-05
80	10023810100	NM_006889	CD86	3.06939	0.000532687	0.000785828	1.35476	0.000821054	0.00106811	1.26825	0.00174576	0.000881851	1.21902	0.21177	0.000830101	0.237352	0.00017155
81	10023810348	NM_014788	TRIM14	3.62188	0.0129415	0.0124563	1.21413	0.00575483	0.00530696	1.20455	0.000846803	0.000574231	1.24077	0.178342	0.00493548	0.195228	0.00205336
82	10023810366	NM_001440	EXTL3	3.2538	0.000179887	0.000914752	0.857448	8.77976e-05	0.000590503	0.885498	0.000152588	0.000760734	0.905983	-0.250172	7.27615e-05	-0.238424	0.000159961
83	10023810374	Contig33201_RC		4.03322	0.136843	0.0902466	1.08207	0.00690466	0.00590962	1.11896	0.00365806	0.00364733	1.11213	0.181707	0.00604255	0.190268	0.00401239
84	10023810396	Contig38479_RC		3.20772	0.00279081	0.00449288	0.90139	0.00453293	0.00596756	0.926029	0.0162514	0.01706	0.946195	-0.183253	0.00561881	-0.171544	0.00961086
85	10023810432	NM_001759	CCND2	4.75785	0.0637372	0.0923803	1.2007	0.00728697	0.0109625	1.23622	0.000618458	0.00150865	1.26644	0.231691	0.00026189	0.232086	0.000255453
86	10023810484	NM_003982	SLC7A7	3.58495	0.0019806	0.000764549	1.3258	0.00153679	0.00133389	1.25357	0.0107083	0.00508708	1.18495	0.170639	0.00767908	0.199792	0.00174799
87	10023810529	NM_019094	NUDT4	3.41542	0.0198049	0.00829715	1.15725	0.00807929	0.00292796	1.13756	0.0453012	0.0442816	1.08828	0.188321	0.00302453	0.199344	0.00167645
88	10023810614	NM_001066	TNFRSF1B	4.61326	0.00161356	0.00296187	1.22182	0.000105023	9.33409e-05	1.22519	0.000106752	2.49147e-05	1.19618	0.287141	7.71779e-06	0.287977	7.24147e-06
89	10023810636	Contig39087_RC	ZDHHC3	3.0655	0.00264198	0.0031833	1.1866	0.0028348	0.00183469	1.15876	0.00152272	0.00136077	1.14241	0.216703	0.000620941	0.185848	0.00343793
90	10023810641	NM_000285	PEPD	4.34027	0.00452691	0.00542724	1.21188	0.000825942	0.000662386	1.19943	0.000374496	0.000585198	1.1914	0.202605	0.00136811	0.195692	0.00200242
91	10023810659	NM_004183	BEST1	2.84736	0.000515044	0.000785828	1.19794	0.00325584	0.00156361	1.13916	0.000230014	0.00016582	1.15141	0.259572	3.63069e-05	0.251842	6.26422e-05
92	10023810665	R91034_RC	DNASE1	2.51418	7.03335e-06	7.84397e-05	0.764739	6.07967e-06	2.15769e-05	0.800384	9.83477e-06	2.42591e-05	0.829577	-0.218791	0.000533828	-0.203863	0.00127477
93	10023810829	Contig2099_RC	TTYH3	4.72036	0.0251909	0.0413254	1.24383	0.0020948	0.00215715	1.28331	7.40886e-05	9.93013e-05	1.34473	0.230839	0.000339087	0.249407	0.000104123
94	10023810849	Contig42437_RC	CSNK1E	3.30123	0.00692934	0.0054723	1.12483	0.00443769	0.00667274	1.10306	0.0341922	0.029753	1.07487	0.190053	0.00359098	0.173309	0.00801784
95	10023810856	NM_005620	S100A11	4.03218	0.000391424	0.000398993	1.32434	0.000285506	0.000404	1.24836	0.00198567	0.00237375	1.18189	0.232025	0.000241743	0.196199	0.00199015
96	10023811114	Contig6382_RC	CR1	3.19988	0.00160575	0.00476134	1.3942	0.000919938	0.00244665	1.36772	0.000703454	0.00143516	1.31337	0.206935	0.00107087	0.194923	0.00208749
97	10023811238	NM_020197	SMYD2	3.21111	0.00443959	0.00829715	1.19994	0.0592016	0.0577531	1.10231	0.0926909	0.140987	1.07788	0.172895	0.00644941	0.168861	0.00782521
98	10023811263	Contig39616_RC	PPAPDC1A	2.44593	0.000981152	0.00241387	0.838999	0.00316042	0.00178671	0.861875	0.00563687	0.00221729	0.888901	-0.218848	0.000532009	-0.234063	0.000205939
99	10023811279	D86976	HMHA1	4.06614	0.00302947	0.00644565	1.28613	0.000178456	0.000109076	1.29141	0.000111401	4.6432e-05	1.2585	0.25137	7.96149e-05	0.256574	5.57628e-05
100	10023811286	Contig43639_RC	NCAM2	2.19431	0.00464952	0.00586182	0.840555	0.00280964	0.00313443	0.856278	0.000200868	0.000383496	0.842096	-0.246765	9.49075e-05	-0.236317	0.000189182
101	10023811348	D79991	NUP188	3.66358	0.00267953	0.00111282	1.22215	0.000325382	0.000245094	1.20137	1.00732e-05	1.33514e-05	1.22264	0.307457	1.02408e-06	0.298095	2.23551e-06
102	10023811409	NM_013385	CYTH4	3.9778	0.0031063	0.00665546	1.28391	0.000636101	0.000649333	1.26616	0.000765502	0.000316501	1.23651	0.240634	0.000315873	0.248224	0.000199881
103	10023811483	NM_006914	RORB	1.95128	0.00113249	0.00476134	0.731101	0.00892234	0.0105872	0.815032	0.00163656	0.00177211	0.800216	-0.19677	0.00192957	-0.198772	0.0017299
104	10023811505	NM_006344	CLEC10A	3.84705	0.00139868	0.00181836	1.46839	0.000128746	0.000227988	1.43595	0.000627339	0.000456691	1.34562	0.225484	0.000354414	0.225072	0.000363584
105	10023811579	Contig45953_RC		2.95179	0.000567079	0.00117403	1.39615	0.000176311	0.000570834	1.3569	1.72257e-05	8.15392e-05	1.34066	0.276301	1.09529e-05	0.216225	0.000638844
106	10023811626	NM_000754	COMT	4.52582	0.000145793	0.000386894	1.17221	1.83582e-05	5.17368e-05	1.16264	0.000291348	0.000391006	1.12176	0.244699	0.000120285	0.264268	3.12676e-05
107	10023811635	Contig22534_RC		3.88884	0.00606853	0.00256908	0.844083	0.0029341	0.000808597	0.852437	0.00629562	0.00218558	0.884427	-0.181042	0.00447206	-0.188749	0.00301721
108	10023811677	Contig38497_RC	GDPD1	2.82873	0.0023219	0.00157422	1.16784	0.0390661	0.0299401	1.10627	0.0263711	0.0178745	1.09642	0.165706	0.00907729	0.176933	0.00529292
109	10023811808	NM_005213	CSTA	3.62887	0.000653267	0.00117403	1.34992	0.0014956	0.00570345	1.24428	0.00137651	0.00323427	1.21637	0.2343	0.000209007	0.207027	0.00109076
110	10023811934	NM_002951	RPN2	3.86343	0.00404698	0.00435942	1.11705	0.0125715	0.00869554	1.08283	0.00428063	0.00489771	1.08681	0.225507	0.000353913	0.22094	0.000468671
111	10023812119	NM_004355	CD74	5.12495	0.0496361	0.0532219	1.24844	0.00137532	0.00158781	1.33963	0.00101173	0.00142652	1.28259	0.196417	0.00238586	0.209257	0.00119367
112	10023812596	AL050367	FAM171A1	3.89037	5.68628e-05	0.00015676	1.3322	0.000532925	0.0014174	1.22932	2.03848e-05	0.000107706	1.24166	0.3028	1.30408e-06	0.25725	4.4421e-05
113	10023812617	NM_006847	LILRB4	3.14331	0.00303721	0.00290495	1.36428	0.00223351	0.00376302	1.28924	0.00104809	0.000711262	1.28769	0.206126	0.00114802	0.19957	0.00165582
114	10023812679	NM_000218	KCNQ1	3.34791	0.00825024	0.024734	1.25992	0.000685275	0.00132978	1.26782	1.78814e-05	2.90275e-05	1.30191	0.254901	5.05834e-05	0.258678	3.87047e-05
115	10023812746	NM_004648	SIRPA	3.63006	0.0348498	0.0275739	1.13248	0.0101987	0.00570345	1.12483	0.000366271	0.000280201	1.15925	0.205792	0.00114293	0.218772	0.000534444
116	10023812757	Contig53615_RC	PGP	3.67794	0.00515622	0.00241387	1.1472	0.0047366	0.00349426	1.12292	0.0108041	0.00691235	1.10017	0.179432	0.00467396	0.173271	0.00633264
117	10023812769	NM_013439	PILRA	2.96528	0.00250685	0.000869751	1.30528	0.00104702	0.000468075	1.24743	0.0101383	0.00282633	1.18347	0.187778	0.00311129	0.221041	0.000478464
118	10023812822	Contig40527_RC		3.31	0.0052281	0.00978267	0.896398	0.0132669	0.0172319	0.926159	0.0133337	0.0219402	0.937119	-0.188611	0.00292056	-0.173065	0.00639631
119	10023812897	NM_004383	CSK	2.82919	0.117559	0.087165	1.08929	0.0287169	0.014811	1.09844	0.00164711	0.000647008	1.12264	0.181506	0.00428927	0.210678	0.000884453
120	10023812899	NM_003928	FAM127A	4.64786	0.00275815	0.00202042	1.11702	0.000126302	0.000152826	1.13	0.00056529	0.000826657	1.10415	0.194352	0.00224518	0.217295	0.000615214
121	10023813014	NM_001558	IL10RA	3.90978	0.000480831	0.00136179	1.40496	3.48091e-05	9.10163e-05	1.3758	2.31266e-05	3.93987e-05	1.33085	0.271585	1.56449e-05	0.264642	2.61296e-05
122	10023813065	NM_004864	GDF15	3.01808	0.0004372	0.000358462	1.34096	0.000253201	4.42266e-05	1.28842	0.0153019	0.000456691	1.20883	0.195246	0.00205138	0.281015	7.29854e-06
123	10023813094	NM_021179	C1orf114	2.27557	0.00977147	0.00829715	0.939777	0.0242741	0.0293548	0.94824	0.038933	0.0495658	0.959998	-0.183906	0.00372652	-0.171832	0.0067892
124	10023813189	NM_006558	KHDRBS3	3.6006	0.00246352	0.00364649	0.867165	0.0137212	0.0136015	0.907419	0.00916952	0.00649828	0.914457	-0.219135	0.000522872	-0.200547	0.00153433
125	10023813293	Contig48278_RC		3.10854	0.0103559	0.01296	1.1388	0.00142574	0.00112867	1.13513	0.000289321	0.000348032	1.13606	0.229168	0.000281403	0.197897	0.00177569
126	10023813366	NM_005408	CCL13	3.62026	0.0390697	0.053668	1.48644	0.00932664	0.0125724	1.45704	0.00376302	0.00377458	1.43899	0.184092	0.00509997	0.169895	0.00984197
127	10023813428	Contig47416_RC	C14orf181	2.68758	0.0115132	0.00310266	0.896385	0.0020467	0.000684142	0.900939	0.00132179	0.00122631	0.915115	-0.169626	0.00818637	-0.219284	0.000591439
128	10023813466	Contig42342_RC	CLN8	3.30386	0.00175035	0.00181836	1.13779	0.000529408	0.000660658	1.12644	0.000968218	0.000842214	1.11039	0.215929	0.000650153	0.206628	0.00111578
129	10023813548	NM_004107	FCGRT	4.74687	1.7643e-05	4.8697e-05	1.30628	7.7486e-07	2.80142e-06	1.26766	2.44379e-06	2.44379e-06	1.23366	0.294497	2.47996e-06	0.29408	2.56632e-06
130	10023813628	L10374	FAM155A	2.62846	0.0187625	0.0306907	0.777242	0.00509363	0.0105872	0.789998	0.00475961	0.00939834	0.821025	-0.234463	0.000206828	-0.179736	0.00468756
131	10023813840	NM_000358	TGFBI	4.61491	0.0228763	0.0263076	1.29465	0.00749052	0.0112228	1.25955	0.00134188	0.00224245	1.27452	0.174957	0.00624987	0.196743	0.00206114
132	10023813963	NM_002205	ITGA5	3.41793	0.0428838	0.0759926	1.12755	0.00545686	0.00922322	1.13698	0.00239593	0.00163728	1.1438	0.213505	0.000808824	0.203487	0.00142706
133	10023814014	NM_005873	RGS19	3.35847	0.000969589	0.000746727	1.27324	0.000180721	6.17504e-05	1.23056	0.0008654	0.000172734	1.19457	0.229669	0.000272638	0.258063	4.04408e-05
134	10023814032	NM_000591	CD14	4.55342	0.000172973	0.000366569	1.40922	0.000711322	0.00111121	1.30139	0.00319499	0.000677764	1.2435	0.194912	0.00305769	0.223394	0.00066114
135	10023814084	Contig50106_RC	KIF21A	3.28139	0.00147641	0.00129557	0.729253	0.000676692	0.000557363	0.748972	0.000535071	0.000341296	0.767542	-0.251335	6.71595e-05	-0.251128	6.81256e-05
136	10023814087	NM_018474	PLK1S1	3.03267	0.00440007	0.00469065	0.872966	0.000312209	0.000550926	0.860169	1.10269e-05	3.18289e-05	0.851444	-0.243921	0.000126625	-0.252506	7.11843e-05
137	10023814279	NM_004628	XPC	3.35571	0.00219941	0.00417024	0.929247	0.00372374	0.00934726	0.948055	0.00100732	0.0028426	0.950053	-0.192675	0.00245491	-0.195365	0.00212655
138	10023814343	NM_014902	DLGAP4	3.22016	0.00218761	0.00365198	1.18313	0.000315905	0.000252306	1.17145	3.93391e-06	3.03984e-06	1.18272	0.281344	8.82521e-06	0.276649	1.26022e-05
139	10023814394	Contig56096		3.01644	0.00216651	0.00142866	1.243	0.00894213	0.0103481	1.15964	0.00146198	0.00135648	1.16518	0.238193	0.000162391	0.248095	8.3869e-05
140	10023814506	NM_001276	CHI3L1	2.86862	0.00459349	0.00129557	1.7174	0.00359344	0.00132978	1.55371	0.00162506	0.000858068	1.49082	0.242336	0.000127611	0.241055	0.000138879
141	10023814561	NM_003645	SLC27A2	2.70643	0.000818849	0.00209677	0.4555	0.0033741	0.0124595	0.584741	0.00122863	0.0065996	0.597142	-0.194911	0.00217902	-0.177566	0.00531467
142	10023814599	NM_003236	TGFA	2.93158	0.000495195	0.000493169	1.45053	0.00112891	0.00125933	1.3386	0.00318098	0.00310588	1.26424	0.238153	0.000157846	0.202045	0.00141164
143	10023814806	AF007153	ERBB4	3.17706	0.0950823	0.0426393	0.914644	0.00349838	0.000756085	0.885709	0.00209212	0.000206053	0.896279	-0.195113	0.0027218	-0.266803	3.55514e-05
144	10023814838	NM_017456	CYTH1	4.0982	0.0669022	0.103934	1.10011	0.0178322	0.027657	1.10254	0.00406367	0.0065996	1.10827	0.201047	0.00149233	0.184136	0.00368282
145	10023814850	NM_002308	LGALS9	3.82485	0.0134376	0.0165937	1.17163	0.00405347	0.00250858	1.16275	0.000248194	0.000248909	1.18824	0.216359	0.000799426	0.222595	0.000556235
146	10023815014	NM_003940	USP13	3.32045	0.0027107	0.0031833	0.861516	0.00619209	0.00952637	0.896212	0.0279951	0.0444549	0.926086	-0.236352	0.000177562	-0.189004	0.00286101
147	10023815040	NM_018530	GSDMB	3.6847	0.0076434	0.0151592	0.787059	0.00490224	0.00849819	0.827278	0.00185263	0.0023337	0.836098	-0.204485	0.00125961	-0.197441	0.00186043
148	10023815063	NM_014723	SNPH	2.46053	8.10623e-06	5.17368e-05	1.31965	1.24574e-05	0.00010401	1.23358	9.53674e-07	1.15633e-05	1.23825	0.267612	2.10175e-05	0.254755	5.29475e-05
149	10023815142	NM_005025	SERPINI1	2.99394	0.000914216	0.00111729	0.769344	0.000100911	0.000230312	0.785256	0.000162601	0.000107706	0.805278	-0.255564	5.00257e-05	-0.251321	6.72222e-05
150	10023815179	NM_000022	ADA	3.25953	0.00272763	0.00310266	1.16557	0.00222021	0.00144464	1.14077	0.0185958	0.0134806	1.09563	0.174877	0.00672259	0.169919	0.00848118
151	10023815184	NM_006227	PLTP	4.65654	0.00125408	0.00131899	1.44421	0.000344753	0.000811219	1.37818	0.000283062	0.000631034	1.30983	0.255671	0.000101462	0.211064	0.00141575
152	10023815220	Contig37598	ALDH6A1	3.58398	0.00155771	0.00644565	0.774769	0.00375938	0.00869554	0.836887	0.00969899	0.0213554	0.872795	-0.17087	0.00734882	-0.169219	0.00794668
153	10023815275	NM_005475	SH2B3	3.85202	0.0410195	0.0419415	1.149	0.00958526	0.0132619	1.15334	0.00187945	0.00437319	1.1609	0.210717	0.00107372	0.176118	0.00644885
154	10023815403	Contig43613_RC	BNC2	3.3883	0.0385939	0.0194945	0.848604	0.00449473	0.00331008	0.827736	0.00447643	0.00263846	0.85269	-0.199908	0.00194088	-0.198703	0.00206954
155	10023815459	Contig63566_RC		2.9824	0.0182819	0.0172971	0.858794	0.00322092	0.00348699	0.857992	0.00734323	0.00758982	0.889869	-0.209756	0.000979271	-0.194362	0.0022916
156	10023815662	Contig28522_RC	FAM105A	2.9488	0.0136796	0.0140216	1.18842	0.00747263	0.0109056	1.16673	0.00308269	0.00372291	1.15841	0.192706	0.00235164	0.190203	0.00268595
157	10023815711	NM_002831	PTPN6	3.26137	0.00879502	0.00927162	1.15809	0.00416547	0.00191683	1.12768	0.00347334	0.00124955	1.12038	0.198732	0.00251868	0.227472	0.000522358
158	10023815816	NM_000480	AMPD3	3.32501	0.000145793	0.000273347	1.43979	8.59499e-05	0.000257611	1.33794	6.31809e-05	0.000140607	1.29443	0.310251	6.54022e-07	0.272354	1.41829e-05
159	10023815826	NM_002081	GPC1	4.09943	0.0570096	0.0213439	1.11436	0.00652027	0.00244665	1.12851	0.000255048	0.000341296	1.16415	0.211671	0.000814549	0.230275	0.000262372
160	10023815840	Contig33441_RC		2.40637	0.00635505	0.00864828	0.877418	0.00201011	0.00178671	0.869828	0.000270963	0.000474572	0.864946	-0.193629	0.00233353	-0.181089	0.0044614
161	10023815864	NM_001154	ANXA5	5.15519	0.00285065	0.00304121	1.34136	0.00279635	0.00232309	1.25758	0.0187943	0.0213554	1.17819	0.184743	0.00356988	0.210073	0.000893892
162	10023815883	NM_001628	AKR1B1	4.09366	6.98566e-05	0.000231802	1.24312	3.69549e-05	9.10163e-05	1.1833	0.00020045	0.000534296	1.14144	0.233026	0.000271129	0.242878	0.000144656
163	10023815921	Contig49589_RC	TDRD9	2.46965	0.0139388	0.0218036	1.38022	0.00901264	0.0236769	1.311	0.000375867	0.000334024	1.3579	0.194743	0.00215287	0.194627	0.00216623
164	10023815987	NM_001114	ADCY7	3.57021	0.00527048	0.00978267	1.26759	0.00627106	0.00901187	1.21816	0.000798285	0.000874221	1.23384	0.21839	0.000657199	0.207037	0.00125673
165	10023816018	NM_001394	DUSP4	3.3462	0.000451565	0.00016588	0.655164	0.0162495	0.00447685	0.773021	0.0167292	0.00620246	0.79977	-0.199466	0.00162894	-0.216425	0.000615237
166	10023816099	NM_000691	ALDH3A1	2.67866	0.00438494	0.00219798	0.900948	0.00969768	0.00144231	0.92696	0.0114943	0.00138515	0.939617	-0.18956	0.00283484	-0.266955	2.20592e-05
167	10023816108	NM_006139	CD28	2.8784	0.00723386	0.00795883	1.30311	0.00545418	0.0099678	1.29126	0.00213963	0.00397354	1.27404	0.209498	0.000924138	0.171574	0.00687405
168	10023816143	NM_005360	MAF	3.78995	0.00032115	6.97374e-05	1.24831	8.42214e-05	2.39611e-05	1.20029	0.000178516	3.55244e-05	1.17411	0.218914	0.00054402	0.228765	0.000297047
169	10023816157	NM_000195	HPS1	2.97804	0.0621629	0.0378396	1.09333	0.0554582	0.0349957	1.0773	0.000888467	0.000483751	1.11541	0.202635	0.00136576	0.211907	0.000803355
170	10023816202	Contig36042_RC	PIK3CG	2.99427	0.00294501	0.00149983	1.2555	0.00932008	0.00729549	1.2045	0.0164384	0.00724548	1.17091	0.168703	0.00814231	0.184465	0.00376183
171	10023816340	Contig8891_RC		2.77251	0.00573915	0.00617611	1.19617	0.00124574	0.00178671	1.1785	0.000226796	0.000667632	1.17258	0.248811	7.7219e-05	0.244843	0.000101141
172	10023816434	NM_017849	TMEM127	3.43864	0.284852	0.137468	1.06121	0.0728902	0.0262022	1.08229	0.00190008	0.000491977	1.12249	0.173523	0.00692762	0.197053	0.00211656
173	10023816535	NM_007310	COMT	4.473	8.9407e-06	1.60933e-05	1.21445	1.60933e-06	3.21865e-06	1.19243	4.81606e-05	3.40939e-05	1.14776	0.282165	7.59772e-06	0.295176	2.70425e-06
174	10023816895	Contig37898_RC	C12orf42	2.16852	0.0244194	0.0229847	1.07666	0.00745314	0.00612646	1.07165	0.00411469	0.00582695	1.0685	0.182461	0.0040871	0.235151	0.000197855
175	10023816977	Contig40887_RC		3.0476	0.0019148	0.000547647	1.16496	0.00816572	0.00285429	1.1274	0.0043391	0.0025835	1.11572	0.205357	0.0011715	0.21213	0.000792983
176	10023817018	NM_000170	GLDC	2.17889	0.0299419	0.0341053	0.864968	0.00085187	0.00160605	0.830482	0.000838935	0.00315785	0.855759	-0.228121	0.000309294	-0.199047	0.00170406
177	10023817056	AL122085	ADAMTSL4	2.34509	0.130755	0.130167	1.11746	0.0181638	0.011152	1.1472	0.000891507	0.000474572	1.18067	0.167661	0.00828224	0.216664	0.000606525
178	10023817079	AB002316	RIMBP2	2.83674	7.98702e-06	1.81198e-05	0.864523	4.73261e-05	9.44138e-05	0.888781	0.00121981	0.00124466	0.923124	-0.270368	1.64653e-05	-0.232005	0.000235018
179	10023817307	NM_000147	FUCA1	4.41532	0.00428253	0.00455636	1.20725	0.00583535	0.00843465	1.17324	0.0017423	0.00200248	1.17676	0.177491	0.00552675	0.186769	0.00347591
180	10023817451	NM_005507	CFL1	4.68373	0.00874358	0.0140216	1.14344	0.000186741	0.000641704	1.16219	0.00104964	0.00264054	1.12871	0.201346	0.00150107	0.19953	0.00165945
181	10023817510	NM_006367	CAP1	4.25692	0.011153	0.0141883	1.13136	0.0564667	0.062121	1.08287	0.00301695	0.00528669	1.11187	0.184073	0.00383767	0.175012	0.00602185
182	10023817556	NM_002933	RNASE1	4.74735	0.000310779	0.000366271	1.4239	0.000484586	0.00230223	1.30294	0.00449872	0.00819641	1.22649	0.200111	0.00164323	0.167278	0.00870476
183	10023817701	NM_003498	SNN	2.89313	0.000834644	0.00106311	1.25192	0.000145018	0.000252783	1.23386	0.00252527	0.00196886	1.16045	0.206517	0.00112284	0.211124	0.000861851
184	10023817741	Contig44180_RC	MAP3K9	2.14051	0.0470325	0.0564371	0.870895	0.00306451	0.00447685	0.854955	0.0145206	0.0205036	0.895235	-0.175788	0.0056002	-0.177679	0.00510075
185	10023817811	NM_003014	SFRP4	3.82814	0.000120282	0.000110507	1.77306	0.00105494	0.000753999	1.49941	0.00176316	0.00178433	1.4033	0.273525	2.39426e-05	0.253212	9.63053e-05
186	10023817845	NM_017699	SIDT1	2.43387	0.000792205	0.000467837	1.26492	0.00277966	0.000299752	1.21823	0.0186073	0.00600415	1.15319	0.172532	0.00667493	0.186169	0.00338156
187	10023817930	NM_001584	MPPED2	2.78462	0.00419122	0.00455636	0.856974	0.0111429	0.0199621	0.894146	0.00479287	0.00794876	0.894853	-0.182093	0.00432162	-0.196175	0.00207989
188	10023818059	AL137333	SNX29	3.97453	0.322031	0.46189	1.07297	0.0687801	0.114652	1.11027	0.00326252	0.00766891	1.15676	0.194931	0.00217664	0.172034	0.00695195
189	10023818175	NM_001885	CRYAB	5.07419	0.00152624	0.00264907	1.56304	0.00473517	0.00616991	1.37693	0.000455022	0.000752568	1.41599	0.226935	0.00040594	0.227043	0.00040331
190	10023818227	NM_007268	VSIG4	4.48728	0.00266218	0.00435394	1.3785	0.000800848	0.00229615	1.35459	0.000521183	0.000331998	1.33258	0.196693	0.00386724	0.23996	0.000397657
191	10023818329	NM_020038	ABCC3	3.33899	0.00762713	0.0134815	1.47541	0.0065217	0.00642401	1.36762	0.000261784	0.000315487	1.42576	0.243559	0.000110271	0.238998	0.000149321
192	10023818388	NM_020404	CD248	3.34104	0.0086506	0.01296	1.30043	0.00303489	0.00188386	1.27165	0.000214279	0.000107229	1.29969	0.232255	0.000231286	0.208543	0.000976485
193	10023818436	NM_005181	CA3	3.62083	0.000319183	0.000420809	0.308682	0.00143468	0.00148177	0.43369	0.000107944	9.64999e-05	0.423387	-0.279345	8.67123e-06	-0.282179	6.95868e-06
194	10023818516	NM_014149	WDR91	3.28335	0.0425021	0.0511903	1.09165	0.0103545	0.00974482	1.0883	0.0021041	0.00200027	1.08791	0.239734	0.000142243	0.213842	0.000717088
195	10023818592	NM_020547	AMHR2	3.36048	0.000950158	0.00264907	0.849672	0.00181359	0.00308055	0.880629	0.00245863	0.005647	0.899718	-0.235111	0.000198364	-0.21365	0.000743719
196	10023818611	NM_001909	CTSD	3.56762	0.00884485	0.0059613	1.15935	0.00658905	0.00403124	1.13872	0.00229913	0.000832617	1.12867	0.190682	0.00327377	0.229867	0.000370402
197	10023818657	NM_005609	PYGM	2.86624	0.000697494	0.000640035	0.770732	0.000491619	0.000701308	0.800727	0.0014078	0.00249767	0.841264	-0.229961	0.00026764	-0.220676	0.000476259
198	10023818948	Contig45730_RC		2.7979	0.0151084	0.028581	0.831889	0.0172144	0.0305356	0.871162	0.00114799	0.00354439	0.849404	-0.203784	0.00128045	-0.187026	0.00317248
199	10023819008	Contig60194_RC	SH3RF3	3.57386	0.0753132	0.0980809	1.12225	0.0489944	0.0437735	1.10528	0.00693458	0.00563514	1.12336	0.186832	0.00339779	0.172616	0.00687544
200	10023819078	NM_004490	GRB14	2.89152	0.000848055	0.00133562	1.42473	0.000945628	0.00158125	1.32998	0.000204325	0.0006634	1.3292	0.263366	3.46364e-05	0.243082	0.000138209
201	10023819095	AB007946	PDE4DIP	2.48471	0.00159538	0.00219798	1.26833	0.00411206	0.00458777	1.19919	0.000149369	0.000234127	1.22414	0.286599	4.69894e-06	0.265328	2.39185e-05
202	10023819126	NM_016735	LIMK1	2.89409	0.0339286	0.0527749	1.13306	0.00389212	0.00571197	1.13617	0.000178754	0.000220835	1.15586	0.196903	0.00208805	0.197323	0.00204156
203	10023819128	NM_014791	MELK	2.339	0.101099	0.0296197	1.12803	0.0456495	0.0221367	1.12983	0.00740141	0.00489771	1.1488	0.166668	0.00867799	0.219005	0.000526987
204	10023819265	NM_000216	KAL1	3.13219	0.0216552	0.024734	0.810897	0.00929642	0.0118578	0.825917	0.00418341	0.00238264	0.827382	-0.211542	0.00084121	-0.222738	0.000431491
205	10023819286	NM_016423	ZNF219	4.60229	0.0246093	0.0341053	1.13473	0.00346768	0.00840336	1.15024	0.000644922	0.00207466	1.17191	0.170701	0.0075314	0.168633	0.00830187
206	10023819321	AB037823	CHPF2	3.55722	0.0219445	0.0234109	1.11453	0.00950623	0.00532669	1.10673	0.00836647	0.00456935	1.10358	0.188499	0.00567139	0.201571	0.00305729
207	10023819337	NM_014002	IKBKE	3.13704	0.00384068	0.00731903	1.11638	0.0317537	0.0407625	1.06715	0.00882942	0.0120192	1.06899	0.168125	0.00810262	0.18249	0.00400565
208	10023819355	Contig39649_RC		3.10629	0.00104761	0.000273824	0.843552	0.00136781	0.000471056	0.870432	0.00480652	0.00229561	0.889752	-0.205101	0.00133531	-0.192945	0.00257533
209	10023819378	Contig2263_RC	KIAA1949	4.05656	0.00749063	0.0111164	1.16884	0.00105655	0.0014174	1.16531	0.000414133	0.00051403	1.15322	0.226333	0.00034576	0.231689	0.000246962
210	10023819387	NM_001127	AP1B1	4.58002	0.0430136	0.0569435	1.12067	0.00161338	0.00213396	1.16519	3.61204e-05	8.15988e-05	1.19672	0.234981	0.000674311	0.254365	0.000224713
211	10023819436	NM_017742	ZCCHC2	3.28547	0.0243369	0.0141883	1.15649	0.0274966	0.0355397	1.12315	0.00862205	0.00841832	1.12314	0.179116	0.00492277	0.173126	0.00659676
212	10023819532	NM_003489	NRIP1	3.44344	0.00923747	0.0170181	0.793309	0.0108502	0.0176007	0.842072	0.00269318	0.00397354	0.83199	-0.18223	0.00405888	-0.1713	0.00696518
213	10023819580	NM_003730	RNASET2	4.28571	0.00480521	0.00902629	1.19074	0.00700825	0.0186291	1.14239	0.00798076	0.00296611	1.13439	0.16959	0.0098146	0.182493	0.00540247
214	10023819643	NM_016582	SLC15A3	4.21409	0.0409591	0.0726513	1.12792	0.00283003	0.00271195	1.14734	0.000179291	0.000229478	1.16233	0.208239	0.000993727	0.220971	0.000467786
215	10023819757	NM_021039		2.88101	0.000409305	0.00026238	1.28002	0.000279725	0.000190854	1.21333	0.00121117	0.0010137	1.16517	0.239045	0.00016349	0.23109	0.000272003
216	10023819888	NM_014553	TFCP2L1	2.38682	0.00372219	0.0163773	1.2427	0.000932395	0.00324035	1.21988	0.00101215	0.00113773	1.21302	0.197227	0.00184196	0.197307	0.00183395
217	10023819926	NM_020246	SLC12A9	3.7754	0.0120702	0.0242891	1.13111	0.00297564	0.00438982	1.12394	0.00540286	0.00473368	1.10657	0.220231	0.000589774	0.194668	0.00245311
218	10023819954	NM_019616	F7	2.86292	0.000110865	0.000288725	0.844937	0.000643551	0.000454545	0.862005	0.00675654	0.0032106	0.905095	-0.194411	0.00223815	-0.211109	0.000884091
219	10023819982	NM_003332	TYROBP	4.08925	0.000220954	0.000212729	1.4354	6.02603e-05	8.09431e-05	1.35963	0.000728488	0.000476778	1.27924	0.228722	0.000629456	0.256752	0.000117482
220	10023820057	AB032981	PAIP2B	2.78217	0.00326216	0.00252897	0.854354	0.0142651	0.0114033	0.900076	0.0398139	0.0444549	0.925074	-0.210417	0.000920086	-0.179297	0.00487857
221	10023820066	Contig53952_RC	PIK3AP1	3.59223	0.00054878	0.00129557	1.37378	0.000250518	0.000607789	1.31762	2.21729e-05	5.51939e-05	1.33096	0.260164	3.47968e-05	0.269093	1.8109e-05
222	10023820077	NM_018281	ECHDC2	4.09167	0.00383204	0.00416207	0.867374	0.00041306	0.000395417	0.865202	0.000212371	0.000161409	0.87622	-0.234831	0.000327701	-0.260615	6.32786e-05
223	10023820089	NM_006864	LILRB3	3.006	0.0128391	0.0130899	1.34767	0.00404501	0.00124365	1.30741	0.0253147	0.00208241	1.21796	0.199271	0.0017982	0.215777	0.000708492
224	10023820156	NM_003204	NFE2L1	4.63551	0.0511611	0.0463582	1.09907	0.00313699	0.00269479	1.12699	0.00596404	0.0071339	1.10186	0.179744	0.0048589	0.177997	0.0052965
225	10023820402	NM_009587	LGALS9	3.72614	0.00685209	0.00665546	1.18404	0.00154608	0.000656128	1.17207	0.000112414	0.000103354	1.19622	0.236953	0.000262652	0.245949	0.000149151
226	10023820427	Contig40208_RC	ARNTL2	2.57918	0.0108013	0.0140216	0.829935	0.0129579	0.0126835	0.865917	0.00231099	0.00214803	0.860157	-0.204827	0.00123554	-0.238497	0.000159199
227	10023820431	AK000229	C18orf49	2.3008	0.00522923	0.00455636	1.07177	0.00394464	0.00209296	1.0676	0.00117767	0.000914812	1.06447	0.229901	0.000284701	0.216385	0.000649316
228	10023820550	Contig27618_RC		2.33691	0.00635648	0.00381404	0.915838	0.125467	0.0481936	0.957446	0.0745477	0.0207841	0.959649	-0.168156	0.00822157	-0.187957	0.00308249
229	10023820775	Contig24493_RC		2.78105	0.00255012	0.00290495	0.887696	0.00274783	0.00298953	0.912568	0.00201178	0.00207466	0.923061	-0.204559	0.00125434	-0.210741	0.000881195
230	10023820819	NM_014467	SRPX2	3.65234	1.66297e-05	4.58956e-05	1.62362	9.85265e-05	0.000308871	1.4083	3.95775e-05	6.56843e-05	1.38475	0.303091	1.21031e-06	0.278245	9.04807e-06
231	10023820832	Contig8547_RC		2.77469	0.00538558	0.0101892	1.20069	0.00244307	0.01687	1.18304	0.000168085	0.00193477	1.21217	0.181425	0.00430678	0.174487	0.00607193
232	10023820899	NM_014210	EVI2A	3.42821	1.77622e-05	2.80738e-05	1.55037	0.000196874	0.000441372	1.37501	0.00752437	0.00416267	1.23762	0.233096	0.000278113	0.25057	9.0009e-05
233	10023821022	AL080209	CREB3L2	4.20131	0.0244842	0.018699	1.12873	0.0134848	0.0109223	1.11604	0.000104785	8.28505e-05	1.15929	0.219666	0.000678158	0.226302	0.000458972
234	10023821174	NM_000398	CYB5R3	4.95968	0.00150907	0.000628471	1.25192	6.62208e-05	4.20213e-05	1.26695	1.63913e-05	1.20997e-05	1.26605	0.257234	4.95585e-05	0.260757	3.86757e-05
235	10023821222	NM_004731	SLC16A7	2.96367	0.0143852	0.0405177	0.729658	0.00300336	0.00627369	0.746457	0.000454664	0.00180292	0.740197	-0.204248	0.0013063	-0.181419	0.00438825
236	10023821322	NM_013314	BLNK	3.00894	0.00181502	0.00199992	1.36417	0.00602108	0.0099678	1.25266	0.00479323	0.00950021	1.21988	0.173149	0.00637036	0.169396	0.00762864
237	10023821346	NM_002436	MPP1	3.72831	0.00275916	0.00417024	1.20398	0.00279307	0.00458777	1.1606	0.000768006	0.00156754	1.15875	0.243597	0.000109987	0.22932	0.000278721
238	10023821438	NM_001893	CSNK1D	3.98809	0.0770719	0.0463582	1.08792	0.00504798	0.00230223	1.11104	0.00388432	0.000738621	1.1096	0.210283	0.000950144	0.216289	0.000670053
239	10023821454	NM_003272	GPR137B	3.48733	0.000139654	0.000345945	1.32929	0.000413895	0.000774086	1.24758	0.000549078	0.00122321	1.1995	0.205101	0.00160912	0.210234	0.00121659
240	10023821464	NM_001772	CD33	3.32443	4.26769e-05	4.31538e-05	1.2865	0.000660598	0.000526011	1.18441	0.00128823	0.000746727	1.16445	0.239721	0.000142371	0.245729	9.52675e-05
241	10023821468	NM_003149	STAC	2.50126	0.0048846	0.00761104	0.91575	0.0061003	0.00729549	0.925939	0.00864071	0.00939834	0.934993	-0.184823	0.0036238	-0.180211	0.00457755
242	10023821602	NM_007274	ACOT7	3.3801	0.0457411	0.0546405	1.08062	0.000781119	0.00153834	1.11903	0.000297606	0.000671089	1.10694	0.185227	0.00361821	0.221669	0.00047316
243	10023821642	NM_005874	LILRB2	3.32609	0.00119477	0.000785828	1.33213	0.000210524	0.000100732	1.29312	0.00131893	0.000210047	1.23747	0.219223	0.000534029	0.243923	0.000111163
244	10023821661	NM_001899	CST4	4.09416	0.00491595	0.00797731	1.14917	0.00106466	0.00153333	1.13579	0.000651598	0.00045675	1.12428	0.206758	0.00169642	0.19932	0.00249851
245	10023821691	NM_016530	RAB8B	2.72531	0.00239819	0.0031833	1.18858	0.00232303	0.00349426	1.14967	0.00972682	0.0108522	1.11146	0.207002	0.00111848	0.221474	0.000478773
246	10023821806	NM_003177	SYK	3.84826	0.000176311	0.000321805	1.3342	3.01003e-05	6.10352e-05	1.30139	4.96507e-05	3.76701e-05	1.25455	0.248449	8.18695e-05	0.285407	5.4005e-06
247	10023821864	NM_000377	WAS	3.41541	0.00347894	0.00373548	1.26496	0.000301659	0.000100374	1.25084	0.00110424	6.41942e-05	1.21627	0.223417	0.000413925	0.250334	7.19564e-05
248	10023821934	Contig5954_RC	ZGLP1	3.08884	0.00915134	0.00519645	1.07692	0.00586164	0.00188386	1.06378	0.00261885	0.00096637	1.06254	0.198378	0.00176769	0.222936	0.000426301
249	10023821974	Contig35526_RC	C18orf10	2.85905	0.00272852	0.00333136	1.17799	0.000385523	9.75132e-05	1.19459	0.000123978	4.63724e-05	1.19254	0.255573	4.8245e-05	0.273328	1.3177e-05
250	10023822020	Contig41635_RC	CREB3L2	2.70447	0.000724316	0.000785828	1.13053	2.78354e-05	4.73261e-05	1.12251	0.000127017	0.000143588	1.10718	0.230063	0.000273747	0.266057	2.35628e-05
251	10023822065	NM_001814	CTSC	4.72578	4.48227e-05	8.82149e-05	1.41632	0.000285327	0.000172615	1.30808	0.00062722	0.000348032	1.24696	0.241279	0.000132561	0.241237	0.000132931
252	10023822072	Contig48913_RC	E2F2	2.75742	0.0532494	0.0726513	1.1937	0.0200321	0.0176007	1.17025	0.00180989	0.00107771	1.18565	0.201226	0.00147754	0.190177	0.00268974
253	10023822119	Contig43710_RC		2.57083	0.000268996	0.000826836	1.36966	0.00231212	0.00627369	1.23012	0.00873917	0.0176286	1.16536	0.233965	0.000207236	0.197177	0.00184699
254	10023822130	NM_009590	AOC2	3.27865	0.00395107	0.00701678	1.26537	0.00922936	0.00505662	1.20801	0.00153995	0.000804245	1.22527	0.206625	0.00108993	0.18857	0.00292693
255	10023822189	NM_001859	SLC31A1	3.45618	0.000875771	0.00123149	1.17597	0.0125967	0.0109625	1.10459	0.0056268	0.00515163	1.10792	0.167859	0.00978434	0.185255	0.00429577
256	10023822257	Contig31343_RC		2.6183	0.00305504	0.00939059	0.910787	0.00142056	0.00415856	0.924858	0.0044902	0.013488	0.940202	-0.17999	0.00479994	-0.166499	0.00917
257	10023822275	Contig35866_RC		2.49832	0.00450361	0.00333136	1.25475	0.0122825	0.00689471	1.17831	0.00365138	0.00331384	1.18537	0.199929	0.00169693	0.209327	0.00100361
258	10023822303	Contig45090_RC		2.30102	0.0271114	0.0704365	1.21602	0.00697893	0.021686	1.20529	0.00739193	0.00817603	1.17425	0.178157	0.00498117	0.167893	0.00819196
259	10023822331	NM_017983	WIPI1	3.81822	0.00475514	0.0023036	1.18283	0.00552541	0.00257617	1.13797	0.00488049	0.00310588	1.12886	0.208342	0.000987882	0.19638	0.00192899
260	10023822395	Contig49342_RC	GALNT6	2.68987	0.00791979	0.00901264	1.20029	0.00228447	0.00278228	1.17306	0.00179267	0.00177181	1.15371	0.18974	0.00280813	0.202181	0.00143297
261	10023822417	NM_002115	HK3	3.45398	0.0186714	0.0238454	1.29132	0.0138391	0.0165146	1.2395	0.00153089	0.00120079	1.28731	0.176185	0.00549194	0.192734	0.00234806
262	10023822450	Contig28098_RC	CDKL2	2.28711	0.0072028	0.0110478	0.79854	0.00100839	0.00220525	0.798439	0.0026679	0.0029546	0.834593	-0.220251	0.000488709	-0.202474	0.00137813
263	10023822623	NM_014390	SND1	4.30381	0.113473	0.23977	1.07471	0.0761772	0.0994184	1.06746	0.00895274	0.00894922	1.08985	0.171399	0.00693199	0.184131	0.00368387
264	10023822710	Contig35079_RC		2.73736	0.0468334	0.0378396	0.925745	0.0104586	0.0282133	0.921304	0.00332367	0.00769442	0.922902	-0.18697	0.00318164	-0.169053	0.00775411
265	10023822778	Contig31254_RC	FAT3	2.60178	0.0631073	0.0238454	0.806783	0.00998187	0.00533235	0.787429	0.0340707	0.0142041	0.843535	-0.1928	0.00238867	-0.21407	0.000725593
266	10023822787	NM_007326	CYB5R3	5.15939	0.00241143	0.00194138	1.22153	0.000471652	0.000427961	1.21758	4.30346e-05	3.61204e-05	1.22518	0.2534	8.56035e-05	0.279322	1.38706e-05
267	10023822789	Contig40091_RC	MSI2	2.91396	0.27646	0.223302	0.938952	0.0261642	0.0179764	0.904201	0.00342435	0.00290573	0.884161	-0.19889	0.00171877	-0.174583	0.00604367
268	10023822823	NM_004808	NMT2	3.82654	0.00245804	0.00485563	1.33275	0.003802	0.0101844	1.23496	0.00109851	0.00192875	1.23787	0.256653	7.39643e-05	0.226116	0.000504967
269	10023822920	Contig29921_RC	DOK3	3.30048	0.00132787	0.00111729	1.27635	0.000393748	0.000147581	1.22771	0.00413132	0.000111818	1.17406	0.231261	0.000261311	0.253232	6.09837e-05
270	10023823044	Contig54980_RC	XRCC3	3.74412	0.255194	0.207658	1.06944	0.0304531	0.0287791	1.10837	0.00373644	0.00366253	1.12478	0.195211	0.00205532	0.206908	0.00107252
271	10023823075	NM_001908	CTSB	4.49034	0.000646472	0.000736177	1.37654	0.00195485	0.00306767	1.2662	0.00273907	0.0033443	1.22457	0.223001	0.000473631	0.230215	0.000304555
272	10023823125	Contig28947_RC	CDC25A	2.61248	0.268606	0.287813	1.07096	0.0183846	0.0347286	1.14772	0.00397384	0.00758988	1.16144	0.168445	0.0081104	0.18145	0.00430135
273	10023823186	NM_018421	TBC1D2	3.13972	0.00390172	0.00701678	1.24738	0.00146222	0.00220525	1.21778	0.000530601	0.000179946	1.22394	0.199337	0.00164058	0.224147	0.000384998
274	10023823254	NM_000084	CLCN5	2.77583	0.00399655	0.00701678	1.07475	0.00192088	0.00376618	1.06225	0.000151575	0.000493109	1.07158	0.245627	9.59244e-05	0.259337	3.69242e-05
275	10023823365	NM_017697	ESRP1	2.35747	8.63075e-05	0.000175476	0.881005	0.0117662	0.00783193	0.932818	0.031086	0.0294578	0.948591	-0.172198	0.00678279	-0.184433	0.00369688
276	10023823431	NM_006198	PCP4	2.67565	0.225917	0.207658	0.796007	0.0341522	0.0271104	0.730434	0.00938916	0.00680667	0.725576	-0.185428	0.00344618	-0.170629	0.00719294
277	10023823463	NM_007256	SLCO2B1	4.61457	0.0129266	0.0153671	1.25827	0.00123465	0.00104397	1.2674	0.000604272	0.000659406	1.25556	0.215988	0.000664743	0.214786	0.000713531
278	10023823486	Contig31276_RC		2.98046	0.0177543	0.0221511	0.907157	0.00535053	0.0049355	0.908957	0.00822175	0.00709075	0.922571	-0.214298	0.000753089	-0.189555	0.00295162
279	10023823751	Contig51690_RC		2.94418	0.00217736	0.0027743	0.512329	0.0325731	0.0392501	0.696529	0.00106299	0.00189924	0.614209	-0.230368	0.000268534	-0.226169	0.000349289
280	10023823754	Contig3124_RC	PSMB7	3.83552	0.0282491	0.0235175	1.15994	0.00853664	0.0076493	1.15075	0.000918865	0.000977039	1.16265	0.229508	0.000291806	0.184259	0.00380151
281	10023823983	NM_005337	NCKAP1L	3.77244	8.52942e-05	0.000398993	1.39186	4.30942e-05	0.000142992	1.32149	1.45435e-05	1.93119e-05	1.31093	0.267928	1.97462e-05	0.281718	6.90845e-06
282	10023824006	NM_000032	ALAS2	3.41281	0.0015918	0.00169802	1.73854	0.00261623	0.0114885	1.48409	0.00128275	0.00460035	1.42036	0.250693	8.33402e-05	0.20954	0.0010663
283	10023824264	AF007150	ANGPTL2	4.76993	0.00866997	0.00942862	1.16937	0.00273716	0.0022195	1.15242	0.000287533	0.000187755	1.17546	0.209928	0.000946382	0.210544	0.000913384
284	10023824376	Contig56735_RC	SPTLC3	3.09149	0.00394797	0.00252897	0.841564	0.0209931	0.00505662	0.885378	0.0910512	0.0152603	0.924459	-0.17447	0.00628948	-0.180387	0.00470621
285	10023824539	AB040926	DCDC5	2.2837	0.0360193	0.0235176	0.822683	0.00239247	0.00224209	0.777117	0.0108881	0.0150437	0.839048	-0.177388	0.00526735	-0.181215	0.00435246
286	10023824631	Contig50728_RC	PTAFR	3.90387	0.0108085	0.00617611	1.24823	0.00722545	0.00340772	1.20235	0.0135162	0.00482023	1.16543	0.198203	0.00174613	0.196323	0.00193498
287	10023824667	NM_006317	BASP1	4.1904	0.000631154	0.000595987	1.43156	0.000421047	0.000557125	1.33859	0.00449777	0.00109309	1.24685	0.232548	0.000279336	0.228079	0.00036805
288	10023824726	NM_004809	STOML1	3.39705	0.0228578	0.0392053	1.1356	0.00255817	0.00497073	1.15294	0.00301725	0.00489748	1.12964	0.195665	0.00270261	0.178264	0.00636561
289	10023824840	NM_000260	MYO7A	3.36877	0.017836	0.0213439	1.16675	0.00336027	0.00505662	1.16628	4.36306e-05	0.000143588	1.21433	0.247945	8.19352e-05	0.218349	0.000548232
290	10023824872	NM_002406	MGAT1	4.56307	0.00137007	0.001854	1.17204	0.000281274	0.000328422	1.15939	3.12924e-05	3.49283e-05	1.15647	0.292337	1.25785e-05	0.286136	1.94984e-05
291	10023824946	NM_005428	VAV1	3.11702	0.000781715	0.00149983	1.2514	0.000519633	0.00109798	1.20262	0.00159109	0.0025835	1.16534	0.218697	0.000536859	0.213844	0.000716987
292	10023824967	NM_006224	PITPNA	3.55382	0.00285572	0.00268883	1.14751	0.00386602	0.00360203	1.1153	0.0169572	0.0205282	1.07839	0.222361	0.000646278	0.224233	0.000579815
293	10023824996	NM_017637	BNC2	3.36813	0.004457	0.00158125	0.883213	0.00304806	0.000959277	0.904604	0.000635386	0.000178218	0.905804	-0.233831	0.000221945	-0.225969	0.000363714
294	10023825075	NM_002318	LOXL2	4.0166	0.0396422	0.0704365	1.23189	0.0110607	0.0148349	1.22249	0.00166553	0.00276339	1.23825	0.214764	0.000679052	0.171261	0.00697825
295	10023825088	NM_013287	PEA15	3.68715	0.00130981	0.00233501	1.28607	0.00356978	0.00685066	1.19319	0.0184535	0.0361997	1.1376	0.216507	0.000813432	0.17633	0.00661239
296	10023825146	NM_002033	FUT4	2.94322	0.0479841	0.0238454	1.07808	0.0193973	0.0158237	1.07317	0.00203574	0.0024659	1.08298	0.178686	0.00493934	0.200329	0.001588
297	10023825251	NM_001569	IRAK1	3.64284	0.0701203	0.0351143	1.11167	0.0236167	0.0135201	1.10661	0.00159371	0.000835419	1.12494	0.212007	0.00164326	0.229142	0.000651392
298	10023825294	NM_005851	CDK2AP2	4.20645	0.00407529	0.00617611	1.11495	0.000140488	0.000380754	1.13557	0.000744283	0.000552833	1.11229	0.234011	0.00020663	0.259403	3.67478e-05
299	10023825618	NM_005103	FEZ1	3.30227	0.000694275	0.00219798	1.19944	0.00113469	0.00332308	1.1467	0.0031988	0.00601208	1.11553	0.201745	0.00143548	0.190226	0.00268279
300	10023825719	NM_018457	PRR13	4.46336	0.0670186	0.0942406	1.06817	0.0074243	0.0129699	1.08481	0.00219512	0.00487858	1.08372	0.18739	0.00330168	0.188531	0.00311276
301	10023825737	AL049417	DUSP3	4.26497	0.0332376	0.0253474	1.10152	0.013903	0.0123194	1.09848	0.00332469	0.00455594	1.10139	0.190805	0.00299915	0.193594	0.00259505
302	10023825755	NM_000157	GBA	3.41176	0.052703	0.151547	1.09009	0.00543708	0.0154865	1.09953	0.00083369	0.00236463	1.10247	0.20016	0.00195806	0.197156	0.00229514
303	10023825802	NM_018166	FAM176B	3.28331	0.00132722	0.00067389	1.20056	0.00114644	0.00160605	1.15936	0.0184506	0.0113394	1.10577	0.16856	0.0079375	0.165575	0.00913295
304	10023825822	AL050021	SLC7A1	2.97245	0.153328	0.0661726	1.12191	0.0557913	0.0235379	1.12797	0.00954789	0.00505596	1.14622	0.166746	0.00864631	0.164723	0.00950246
305	10023825972	NM_014391	ANKRD1	2.42574	0.0624137	0.0101892	0.957903	0.0096243	0.00106811	0.956544	0.00908601	0.000676394	0.963782	-0.187834	0.00322682	-0.214213	0.000756833
306	10023826075	Contig57908_RC	C6orf145	3.20184	0.00736165	0.00476134	1.22883	0.0116773	0.0104273	1.1637	0.0142952	0.0120192	1.13884	0.210762	0.000858821	0.181537	0.00420415
307	10023826229	NM_002910	RENBP	3.00377	0.00142848	0.00519645	1.13925	0.000102699	0.000496209	1.13624	6.55651e-05	0.000111818	1.11988	0.223774	0.000393971	0.205053	0.00119188
308	10023826367	NM_018176	LGI2	3.5037	0.00578201	0.0102325	1.25161	0.00218868	0.00615019	1.2321	6.35386e-05	0.000340164	1.27951	0.210072	0.00108639	0.206833	0.00130157
309	10023826368	NM_006399	BATF	2.76591	0.000192463	0.000607729	1.28682	0.000231326	0.000454545	1.22375	0.00033468	0.00041467	1.19629	0.212821	0.000780735	0.222108	0.000448397
310	10023826402	NM_002110	HCK	3.93819	0.000180066	0.000196278	1.45388	0.00010699	0.000107408	1.3637	0.000530005	0.000152767	1.29821	0.248212	8.04491e-05	0.252355	6.0448e-05
311	10023826497	NM_001069	TUBB2A	4.18465	4.64916e-06	2.61664e-05	1.6744	4.64916e-06	2.29478e-05	1.48807	5.96046e-07	2.74181e-06	1.48357	0.385518	6.87983e-10	0.364648	6.28416e-09
312	10023826516	Contig31800_RC		2.88289	0.0084871	0.0116642	0.85648	0.00355327	0.0048824	0.876552	0.000258625	0.000408649	0.864043	-0.211684	0.000944065	-0.214791	0.000789731
313	10023826525	Contig33998_RC	RASEF	2.30272	0.00181568	0.00304121	0.83091	0.00500041	0.00437546	0.854878	0.000480294	0.000977039	0.840118	-0.205961	0.00115885	-0.19657	0.00195057
314	10023826526	NM_018235	CNDP2	4.43008	0.0165898	0.0256511	1.09674	0.00199193	0.00376618	1.10122	0.00023675	0.000512302	1.11227	0.213599	0.000727443	0.229583	0.000274131
315	10023826567	Contig24609_RC	SLC6A4	2.32426	0.00372702	0.00542724	0.753306	0.00176889	0.00264329	0.767921	0.00331438	0.00417149	0.805409	-0.186024	0.00334173	-0.168001	0.00815018
316	10023826637	NM_003786	ABCC3	3.34435	0.00768197	0.0134815	1.48167	0.00615072	0.00612646	1.37338	0.000310183	0.000406742	1.42574	0.24302	0.00011808	0.239096	0.00015307
317	10023826746	NM_006840	LILRB5	3.44294	3.73721e-05	0.000269413	1.42358	1.68085e-05	0.000115097	1.33931	1.54972e-06	2.80142e-06	1.34898	0.261267	5.21636e-05	0.270918	2.65865e-05
318	10023826804	NM_001035	RYR2	2.34222	0.0154222	0.036558	0.878749	0.00150496	0.00447685	0.855854	0.00678939	0.00868452	0.886992	-0.179073	0.00475876	-0.182667	0.00396987
319	10023826998	NM_006244	PPP2R5B	3.54811	0.00803125	0.00731903	1.11275	0.00438803	0.00349426	1.10716	0.00658834	0.00281006	1.0905	0.215966	0.000632293	0.205952	0.00113258
320	10023827027	NM_000560	CD53	3.96058	0.00254542	0.00399023	1.39301	0.000690579	0.00122929	1.36452	0.00409097	0.00270456	1.27584	0.202218	0.00303075	0.229049	0.000756946
321	10023827131	NM_003978	PSTPIP1	2.57858	0.000328898	0.000166357	1.24	0.00222665	0.000906348	1.16224	0.0177712	0.00464755	1.11956	0.167435	0.00850495	0.173445	0.0063869
322	10023827164	Contig30146_RC	PRTG	2.34248	0.00346833	0.00304121	0.844364	0.0200674	0.0240219	0.884378	0.0112733	0.0202263	0.888182	-0.191018	0.0026794	-0.186536	0.00338326
323	10023827296	NM_001988	EVPL	3.10055	0.0059225	0.00591672	0.93928	0.00174743	0.00271195	0.945006	0.0035305	0.00171107	0.952923	-0.183796	0.00381903	-0.207568	0.00105763
324	10023827309	Contig13957_RC		3.18104	0.0136479	0.00865024	0.796154	0.0265274	0.0105872	0.843738	0.00744897	0.00407922	0.836164	-0.207606	0.00108074	-0.208413	0.00103217
325	10023827354	NM_014333	CADM1	2.51672	0.00842178	0.041916	0.871415	0.00583792	0.0240219	0.893183	0.00118411	0.00538647	0.888367	-0.227759	0.000316375	-0.202084	0.00144074
326	10023827391	NM_015991	C1QA	4.76792	6.88434e-05	0.000107288	1.54335	8.46386e-06	2.96831e-05	1.43727	0.000112116	3.8743e-05	1.34845	0.237209	0.00020199	0.263317	3.47584e-05
327	10023827571	NM_000632	ITGAM	3.78965	0.00555426	0.00701678	1.33538	0.00267279	0.00612646	1.29621	0.000898004	0.00174117	1.29284	0.188545	0.00293068	0.205717	0.0011478
328	10023827621	NM_005541	INPP5D	4.40556	0.00877321	0.0101892	1.19446	0.000590503	0.000404	1.20051	0.000230491	0.000105023	1.19209	0.236333	0.000177783	0.251243	6.52973e-05
329	10023827623	NM_001037	SCN1B	3.70401	0.00532591	0.00805491	1.19419	0.000536442	0.000588536	1.17644	8.54135e-05	0.000158966	1.18475	0.261351	6.02235e-05	0.246095	0.000163226
330	10023828053	NM_004762	CYTH1	4.04181	0.0854011	0.141163	1.09131	0.0171093	0.0251873	1.0993	0.00195324	0.00487858	1.11555	0.200185	0.00163656	0.181061	0.0044677
331	10023828171	NM_006762	LAPTM5	4.27038	0.00312865	0.000954509	1.33265	0.000713408	0.000314415	1.2949	0.00130284	0.00043714	1.24888	0.199201	0.00172727	0.248215	8.60344e-05
332	10023828364	X79984	MAF	2.933	0.000947952	0.000785828	1.16698	0.00050652	0.00113559	1.14783	0.00019592	0.000368834	1.13087	0.197033	0.00190219	0.201847	0.00145986
333	10023828478	AK024427	TSPAN17	3.61148	0.00666148	0.00343066	1.1151	0.00438905	0.00389588	1.09969	0.00861984	0.00406724	1.08433	0.194487	0.0026382	0.200525	0.00192027
334	10023828524	NM_022460	HS1BP3	3.59779	0.0578758	0.0317948	1.08093	0.00880218	0.00830489	1.0876	0.00293142	0.00337374	1.09144	0.176486	0.00541097	0.172896	0.00644885
335	10023828675	AF086538		2.6822	0.000470161	0.000709474	0.746476	5.85318e-05	6.17504e-05	0.769323	2.42591e-05	4.11868e-05	0.771568	-0.252684	6.11723e-05	-0.262008	3.16258e-05
336	10023828691	NM_025113	C13orf18	3.26858	0.00396824	0.00672579	1.2526	0.00265175	0.00386095	1.19559	0.0137873	0.00978696	1.14462	0.169304	0.00766232	0.183925	0.00372285
337	10023828830	NM_006478	GAS2L1	3.58578	0.0467439	0.0317948	1.10835	0.00721037	0.00627369	1.1269	0.000916719	0.00143516	1.13476	0.217766	0.000582807	0.193145	0.00234518
338	10023828849	NM_031954	KCTD10	4.00373	0.0371575	0.0448353	1.12029	0.00545502	0.00570345	1.12652	0.00619775	0.00723833	1.11208	0.215066	0.000667003	0.194919	0.00208799
339	10023828871	AK074143	UAP1L1	3.02239	0.0845694	0.0704365	1.0856	0.0214239	0.021686	1.09458	0.00225288	0.00267208	1.11062	0.194645	0.00221027	0.197334	0.00191216
340	10023829076	NM_022060	ABHD4	3.83652	0.0671671	0.0759926	1.09587	0.0113909	0.0088048	1.09747	0.00299323	0.00263435	1.09929	0.167231	0.00886333	0.170192	0.00771503
341	10023829510	ENST00000286825	GOLGA6L9	3.24726	0.0410691	0.027299	0.886596	0.0582499	0.0369771	0.913593	0.00626725	0.00409168	0.897564	-0.174666	0.00612383	-0.183814	0.00388845
342	10023829638	NM_030769	NPL	2.88799	0.0020684	0.00304121	1.3658	0.00328785	0.00520319	1.29846	0.00528002	0.011412	1.23588	0.181769	0.00431187	0.169631	0.00779359
343	10023829703	NM_022338	C11orf24	4.08325	0.0268216	0.0201993	1.12019	0.0039233	0.00196993	1.13083	0.000150025	9.57251e-05	1.15749	0.227324	0.000364119	0.24151	0.000148312
344	10023830686	AF088015		2.83622	0.000524998	0.000207484	0.850871	0.0051657	0.00395793	0.898704	0.00357485	0.000680268	0.90504	-0.218014	0.000559384	-0.251161	6.56693e-05
345	10023830836	NM_032321	C2orf88	2.58298	0.030843	0.0448353	1.13754	0.036613	0.0317572	1.10413	0.0051983	0.00601208	1.12033	0.178729	0.00484118	0.191513	0.00250595
346	10023831160	NM_032174	TOMM40L	3.68771	0.0427297	0.036335	1.10247	0.00705409	0.00577092	1.1152	0.00109613	0.00077945	1.11652	0.220658	0.000545072	0.20713	0.00119227
347	10023831523	NM_022767	AEN	3.61372	0.0179389	0.0176807	1.16557	0.00850147	0.00901187	1.14006	0.0312932	0.0322727	1.11131	0.198591	0.00174722	0.20039	0.0015826
348	10023831928	NM_022144	TNMD	4.16712	1.2517e-06	1.15633e-05	2.31505	6.83069e-05	0.000207901	1.75895	1.3411e-05	3.31998e-05	1.73261	0.328867	1.29621e-07	0.309753	7.19672e-07
349	10023831982	ENST00000222983	AZGP1P1	2.93047	0.000146329	0.000443757	0.732095	4.52399e-05	9.44138e-05	0.751859	3.57628e-07	1.13249e-06	0.74519	-0.295107	2.35868e-06	-0.316261	3.85244e-07
350	10023831994	NM_023003	TM6SF1	2.81138	0.00927782	0.0205624	1.18726	0.0105343	0.0109056	1.15754	0.00738978	0.00993317	1.14383	0.169032	0.00776205	0.181943	0.00411847
351	10023832091	AF177292	CMYA5	2.08074	0.0134007	0.00639981	0.803551	0.00074774	0.000680149	0.788771	0.00117928	0.000647008	0.809343	-0.184953	0.00366936	-0.205542	0.00121469
352	10023832238	NM_022355	DPEP2	3.1116	0.00110066	0.000869751	1.27915	0.00127691	0.000369608	1.2196	0.0223508	0.00146079	1.14142	0.180258	0.00456681	0.221254	0.000472323
353	10023833013	NM_022823	FNDC4	3.5999	0.00419128	0.00519645	1.18391	0.00288588	0.00367349	1.15056	0.00373507	0.00249767	1.13096	0.197355	0.00182916	0.190929	0.00258478
354	10023833406	AK001808		3.56451	0.020106	0.0124563	0.808518	0.017204	0.0161659	0.842496	0.0057655	0.00582695	0.842482	-0.199793	0.00159981	-0.197503	0.00181438
355	10023833551	NM_025213	SPTBN4	2.66234	0.00092721	0.000493169	0.891386	0.00155592	0.00201589	0.91127	0.00166345	0.00255185	0.923203	-0.201681	0.00150698	-0.203576	0.00135631
356	10023834042	AK026942	ARSB	3.4232	0.0519186	0.036558	1.07302	0.0111065	0.011921	1.0807	0.000525951	0.00100225	1.09729	0.209274	0.00095908	0.197858	0.00181861
357	10023834438	NM_138461	TM4SF19	2.9712	0.000642896	0.000512123	1.575	0.00055778	0.00023663	1.46013	0.000221848	0.000121295	1.42557	0.20616	0.00128874	0.264365	3.22588e-05
358	10023834901	NM_024535	CORO7	3.26511	0.0278139	0.0317948	1.14278	0.00439864	0.00324035	1.1456	0.000443876	0.000512302	1.16192	0.23892	0.000150084	0.217956	0.000561354
359	10023834985	NM_015162	ACSBG1	3.89932	0.360315	0.615196	0.911186	0.0432999	0.0617433	0.856012	0.00397998	0.00340337	0.832463	-0.181545	0.00444194	-0.172809	0.00681229
360	10023835334	AK024366		2.48481	0.00308096	0.00701678	1.20904	0.00428987	0.00739616	1.16081	0.06317	0.0247478	1.09013	0.171844	0.00689936	0.176607	0.00547393
361	10023835412	NM_031471	FERMT3	3.48748	0.00207424	0.00455636	1.29741	0.000166357	0.00041616	1.27815	1.07884e-05	3.1054e-05	1.28784	0.272768	1.37462e-05	0.266163	2.24953e-05
362	10023835431	X17653	FCGR2B	3.7312	0.000259995	0.000321805	1.4738	9.81688e-05	8.57115e-05	1.43258	0.000217378	0.000224888	1.35892	0.212799	0.000781758	0.23906	0.00015343
363	10023835654	NM_024762	ZNF552	3.20082	0.0804611	0.0952547	1.072	0.0191451	0.0165146	1.07284	0.00133896	0.00120079	1.08363	0.164799	0.00961634	0.198194	0.00178557
364	10023835781	NM_021642	FCGR2A	3.60213	0.00206333	0.00290495	1.35276	0.000879109	0.00183469	1.31568	0.00222665	0.00210625	1.25236	0.212258	0.000806818	0.213834	0.000735736
365	10023836401	NM_030572	C12orf39	2.16415	0.00648284	0.0110478	0.725266	0.068838	0.0455993	0.843395	0.00874662	0.00620246	0.806333	-0.191674	0.00248459	-0.165502	0.00916403
366	10023836439	NM_031301	APH1B	3.30114	0.00150394	0.00117403	1.14209	0.00254017	0.00314766	1.10649	0.00669706	0.00702387	1.09125	0.195538	0.0020626	0.202322	0.00142182
367	10023836773	AK057772	SYK	4.17223	0.000764668	0.00129557	1.31914	6.74725e-05	0.00010401	1.29575	2.71797e-05	3.03984e-05	1.27703	0.256996	4.52272e-05	0.275009	1.20848e-05
368	10023836792	NM_022755	IPPK	3.62915	0.0624462	0.062124	1.06582	0.00533348	0.00869554	1.08213	0.00372893	0.00639826	1.07964	0.193944	0.00220062	0.193225	0.00228717
369	10023836798	NM_130469	JDP2	3.33447	0.000412762	0.000436068	1.24729	0.000181496	8.56519e-05	1.1988	0.000778615	0.000254154	1.14716	0.270379	3.1142e-05	0.267212	3.88346e-05
370	10023837325	NM_024783	AGBL2	2.42267	0.0043366	0.00157422	0.798031	0.00111437	0.00119233	0.815727	0.00674957	0.0116749	0.866612	-0.19503	0.00207548	-0.203791	0.00127995
371	10023837356	NM_022822	KLC2	3.05764	0.103744	0.0704365	1.07985	0.02185	0.0221367	1.09564	0.00347453	0.00489771	1.1192	0.19379	0.00221893	0.188317	0.00296587
372	10023837758	AK057085		2.44263	0.00508273	0.00795883	1.07404	0.0100027	0.00774837	1.05845	0.0622107	0.0373917	1.03818	0.171731	0.00682224	0.167875	0.00819889
373	10023837969	ENST00000278924	OR10S1	3.32975	0.0544637	0.0848265	1.12594	0.0188347	0.0352578	1.12533	0.00649011	0.00989318	1.12837	0.189329	0.00372306	0.189281	0.00373196
374	10023838006	AK023367	FAM161A	2.34814	0.0502383	0.0351843	0.888903	0.0451931	0.0429504	0.913292	0.00641668	0.00545842	0.89857	-0.194962	0.00217304	-0.170037	0.00764526
375	10023838296	NM_022448		3.29375	0.000913203	0.000961959	0.824007	0.00920773	0.0104273	0.887273	0.00593531	0.00639826	0.894762	-0.169903	0.00782082	-0.167524	0.00874333
376	10023838928	ENST00000299128		4.20901	0.105586	0.245446	0.816252	0.00402778	0.0114033	0.756908	0.000444829	0.000137746	0.75199	-0.210861	0.000853904	-0.201301	0.00147142
377	10023839163	NM_032023	RASSF4	3.69684	0.0199496	0.0244176	1.24668	0.00642651	0.00860196	1.22612	0.000873566	0.000767171	1.2313	0.215019	0.000740622	0.207662	0.00112991
378	10023839237	NM_032255	ZNF541	2.87729	0.00151777	0.00542724	1.35603	0.00224525	0.00598246	1.25412	0.00233626	0.00435501	1.2208	0.23167	0.000262248	0.215824	0.000688657
379	10023839355	NM_058165	MOGAT1	3.08469	0.00796676	0.00829715	0.758326	0.00466216	0.00386095	0.800768	0.0097273	0.00691235	0.837389	-0.170311	0.00730309	-0.195213	0.00205504
380	10023839756	ENST00000238638		2.58755	0.00791335	0.00978267	0.917209	0.00274491	0.00214845	0.928241	0.00896597	0.00855482	0.946161	-0.176688	0.0053574	-0.198748	0.00169466
381	10023840236	NM_024721	ZFHX4	3.38711	0.0130692	0.0179861	0.834099	0.00463527	0.00729549	0.845653	0.0108438	0.013406	0.875318	-0.198204	0.00178458	-0.179257	0.0048009
382	10023840430	NM_030930	UNC93B1	3.72001	0.00413263	0.00978267	1.18055	0.000486255	0.000496209	1.17684	0.000741959	0.000232637	1.16026	0.221643	0.000461281	0.234777	0.000202688
383	10023840431	AK074100	SLC37A2	2.63221	0.0169499	0.0213439	1.23863	0.00400275	0.00849819	1.23108	0.00016129	0.000253618	1.26491	0.225749	0.000358503	0.223189	0.000419738
384	10023840441	NM_030968	C1QTNF1	4.07787	0.0475121	0.0419474	1.12911	0.00533551	0.00334477	1.1488	0.000728786	0.00082916	1.17194	0.205318	0.00144846	0.201906	0.00174351
385	10023840480	AK024876		2.49662	0.00216538	0.00591672	0.686264	0.00227934	0.00739616	0.745386	0.000290632	0.000984192	0.737258	-0.223195	0.000408269	-0.217119	0.00059023
386	10023840559	AL080120	ODZ4	3.30239	0.000918508	0.00290495	1.49837	0.000468314	0.000643671	1.3958	2.8789e-05	7.00951e-05	1.4091	0.294851	2.40886e-06	0.268117	1.9471e-05
387	10023840803	NM_024632	SAP30L	3.85043	0.000591576	0.00147051	1.12512	0.000644445	0.00310957	1.10842	0.00124908	0.00577527	1.08385	0.234512	0.000354916	0.191214	0.00375318
388	10023840976	AK022347		3.28262	0.0511208	0.0166493	0.840015	0.0143518	0.00264591	0.840583	0.00994152	0.00467879	0.854232	-0.185	0.00435022	-0.176773	0.0064753
389	10023841315	NM_022464	SIL1	3.71697	0.00659514	0.00455636	1.15046	0.00168306	0.00148177	1.13338	0.0154487	0.00444937	1.09957	0.198121	0.00175409	0.211612	0.000817341
390	10023841432	NM_017495	RBM38	3.36872	0.044759	0.0546405	1.21226	0.005831	0.00711858	1.22304	0.00415659	0.00531942	1.18558	0.220899	0.00050921	0.19683	0.0020078
391	10023841512	AK057500	C10orf90	1.99586	0.00593454	0.00542724	1.30112	0.0012747	0.00181073	1.2642	0.00370055	0.00351578	1.20063	0.189154	0.00295417	0.185795	0.00351454
392	10023841812	NM_032587	CARD6	3.76387	0.099142	0.202624	1.07999	0.119978	0.118339	1.06539	0.00269496	0.00285751	1.10855	0.170527	0.00734781	0.177351	0.00527702
393	10023841856	NM_032817	ITIH5	3.62042	0.000243783	0.000547647	1.45649	0.00227946	0.00203878	1.29836	0.000911176	0.00174117	1.28622	0.266055	2.26743e-05	0.220417	0.000483797
394	10023841894	NM_022162	NOD2	3.10952	0.0461074	0.024734	1.26871	0.00555205	0.00308055	1.29651	0.00291747	0.000493109	1.28204	0.169488	0.00771993	0.20423	0.00127775
395	10023842460	ENST00000298710	SPTB	2.32697	0.000233948	0.000117898	0.829722	1.06692e-05	2.47955e-05	0.838652	0.000145614	0.000948906	0.882964	-0.267133	2.09419e-05	-0.239464	0.000144807
396	10023842786	NM_024606	DYNC2H1	3.4783	0.0238729	0.0306907	0.834045	0.00899935	0.0142063	0.85128	0.00197166	0.00423944	0.846691	-0.178796	0.00482485	-0.185145	0.00349675
397	10023842867	NM_024829	PLBD1	4.05318	0.00298768	0.0023036	1.1676	0.0200129	0.0255257	1.10639	0.0233942	0.0157658	1.09789	0.174303	0.00602271	0.183269	0.00384993
398	10023843314	NM_031286	SH3BGRL3	4.75433	0.00314677	0.00591672	1.25116	0.000175595	0.00041616	1.25534	3.08752e-05	0.000100672	1.24435	0.242715	0.000116681	0.246785	8.86745e-05
399	10023843574	AK000795		3.50839	0.000999272	0.00158733	0.775681	0.000532389	0.000467122	0.811859	4.60744e-05	3.6478e-05	0.806302	-0.279675	1.74609e-05	-0.277514	2.03916e-05
400	10023843964	NM_025232	REEP4	3.78474	0.00184333	0.00318152	1.17621	0.000130355	0.00031352	1.1732	0.000115275	0.000131011	1.14968	0.256615	7.41516e-05	0.246969	0.000139689
401	10023844477	AK054605		3.0719	0.0143481	0.00901264	0.805499	0.0164409	0.00627369	0.841313	0.0071103	0.00271738	0.845098	-0.220641	0.000477274	-0.216216	0.000622955
402	10023844672	NM_032814	RNFT2	2.72789	0.0821933	0.100974	1.14991	0.00598782	0.00426233	1.19184	0.0049454	0.00366253	1.16068	0.227296	0.000325644	0.221454	0.000466611
403	10023844719	NM_032181	FAM176A	3.35009	0.00147778	0.000746727	0.904325	0.00127429	0.000392258	0.919709	0.00152498	0.00102067	0.933766	-0.214854	0.00067545	-0.216939	0.000596619
404	10023845021	AK055250		3.99132	0.0893514	0.194163	0.77276	0.0030061	0.0103481	0.701829	0.000659227	0.000232637	0.711169	-0.218875	0.000590193	-0.210907	0.000939474
405	10023845500	NM_138284	IL17D	3.35749	0.00275791	0.00290495	1.29475	0.0033927	0.00458777	1.21999	0.000402808	0.000512302	1.22314	0.227888	0.000351714	0.236222	0.000208626
406	10023845510	NM_032414	PROK1	2.51883	0.0330517	0.0140216	1.08745	0.00837338	0.00598246	1.08838	0.00527596	0.00245571	1.07659	0.191655	0.00248708	0.172853	0.00646242
407	10023845750	AB067512	SCAND3	2.02418	0.0112297	0.0110478	0.817576	0.00256455	0.00385934	0.804712	0.00230747	0.00211102	0.818499	-0.199451	0.00170386	-0.204801	0.00126638
408	10023846488	NM_030786	SYNC	3.27793	0.000897348	0.00241387	1.2838	0.00156367	0.00236374	1.20612	8.01086e-05	0.000210941	1.23384	0.249678	8.0571e-05	0.248549	8.69874e-05
409	10023846522	NM_024959	SLC24A6	3.12337	0.0129694	0.0163773	1.09842	0.00263518	0.00292796	1.08973	0.00690681	0.00746322	1.07289	0.189495	0.00278807	0.189103	0.00284615
410	10023847167	AK057335	OTOA	2.56128	0.0011003	0.0023036	1.20025	0.000700176	0.000235081	1.1753	0.000372887	0.000105441	1.16045	0.25462	5.34504e-05	0.260533	3.51626e-05
411	10023847404	NM_031461	CRISPLD1	2.9316	0.040971	0.028581	0.793686	0.0337144	0.0196076	0.816407	0.00865287	0.00401282	0.813943	-0.190162	0.0027466	-0.189007	0.00291821
412	10023847777	AL713756		3.07659	0.00241947	0.00455636	0.874108	0.000262797	0.000522554	0.88779	0.00848699	0.0132359	0.924903	-0.23843	0.000175539	-0.210087	0.000984586
413	10023847781	NM_031459	SESN2	3.97542	0.0574777	0.0571121	1.12127	0.00346291	0.00206047	1.15537	0.00667858	0.00308573	1.13276	0.191462	0.0043709	0.196395	0.00344509
414	10023847782	ENST00000285338		3.49868	0.000207901	0.000209272	1.31507	0.000181139	9.71556e-05	1.23371	0.00126553	0.000466585	1.17442	0.242395	0.000123101	0.238933	0.000154717
415	10023847813	NM_033051	SLC46A2	2.37449	5.60284e-06	5.49555e-05	1.65182	2.38419e-06	2.2471e-05	1.49478	1.3113e-06	3.8743e-06	1.47056	0.33624	6.47931e-08	0.3158	4.23844e-07
416	10023848013	NM_138432	SDSL	2.91862	0.00144768	0.000698507	1.27996	0.00166869	0.00149733	1.20225	0.00150871	0.000711262	1.18784	0.179534	0.00482161	0.205325	0.00122968
417	10023848124	AK074085	WDFY4	3.22966	0.0377979	0.0405177	1.18705	0.00763124	0.00556844	1.19167	0.00130844	0.000680268	1.19741	0.177165	0.00523231	0.202977	0.00133984
418	10023848172	AK057476	SLC25A21	2.88082	0.00490528	0.00701678	0.85172	0.0155764	0.021686	0.893927	0.00998116	0.00691235	0.895673	-0.189925	0.00272563	-0.179477	0.00466347
419	10023848586	NM_024329	EFHD2	3.74236	0.0225232	0.0325544	1.15596	0.00591844	0.00407708	1.14436	0.00202858	0.00145429	1.14925	0.219439	0.000586025	0.230917	0.000291538
420	10023849326	NM_024830	LPCAT1	4.00178	0.0257968	0.0275739	1.16294	0.00460672	0.00125933	1.16006	0.00360024	0.000315487	1.14263	0.177172	0.00523064	0.21516	0.000663311
421	10023849618	AF086149		4.0421	0.00263357	0.00341904	1.21312	0.000133336	0.00019598	1.21521	3.38554e-05	3.08156e-05	1.19841	0.276527	1.21995e-05	0.281403	8.41437e-06
422	10023849889	NM_021603	FXYD2	2.21585	0.00275594	0.00364649	1.17031	0.0036248	0.00556844	1.11846	0.00300568	0.00670242	1.10698	0.193879	0.00220835	0.192356	0.00239592
423	10023850033	AF289562		2.42906	0.341887	0.287813	1.06976	0.0378219	0.0176007	1.12336	0.00584894	0.00312758	1.14615	0.176299	0.00555752	0.211659	0.000835501
424	10023850597	AK055485		2.7102	0.00313669	0.00672579	1.19316	0.00260985	0.00673443	1.14703	0.00912481	0.00591886	1.10822	0.174555	0.005949	0.168763	0.00786179
425	10023850801	NM_022107	GPSM3	3.79794	0.000528872	0.000443757	1.32798	0.000113904	3.61204e-05	1.28361	0.00122511	6.86049e-05	1.22026	0.229308	0.00027893	0.280818	7.41112e-06
426	10023850808	AK056769		2.30682	0.0061329	0.0106108	1.10501	0.00321513	0.00722545	1.08749	0.00341409	0.0043084	1.0838	0.17314	0.00637313	0.16996	0.00742647
427	10023850813	NM_080669	SLC46A1	2.53727	0.00110346	0.00241387	1.19107	0.000860631	0.00292796	1.14641	0.00135446	0.00423944	1.12979	0.179857	0.00457542	0.168318	0.00802899
428	10023851020	NM_030569	ITIH5	3.73288	0.000147521	0.0002895	1.4684	0.000514686	0.000842869	1.32249	2.14577e-05	4.79817e-05	1.32928	0.357214	3.32035e-08	0.308447	2.27832e-06
429	10023851305	AK022117		3.07538	0.00402558	0.00864828	1.21934	0.0132042	0.0049355	1.15696	0.00462151	0.00136077	1.15681	0.186878	0.00325995	0.215744	0.000657311
430	10025902172	NM_005795	CALCRL	3.30643	0.0249849	0.0317948	0.831976	0.00908035	0.0113341	0.848858	0.00108689	0.000890613	0.820856	-0.173143	0.00648077	-0.187561	0.00314656
431	10025902190	NM_032430	BRSK1	3.00285	0.0369692	0.0495347	1.08814	0.0119785	0.0099678	1.08383	0.00248754	0.00245571	1.09178	0.167012	0.00867499	0.166616	0.0088371
432	10025902194	NM_152341	PAQR4	2.88883	0.00399286	0.00542724	1.19586	0.00169164	0.00226349	1.16096	0.000183403	0.000258744	1.17791	0.210353	0.000901246	0.218255	0.000565981
433	10025902260	NM_172245	CSF2RA	3.14177	0.00321704	0.00469065	1.46515	0.00273037	0.00379205	1.38074	0.00490993	0.00450867	1.30999	0.197225	0.00233691	0.203915	0.0016376
434	10025902278	NM_002414	CD99	4.82029	0.100964	0.163656	1.09722	0.00797236	0.0132099	1.12608	0.00226605	0.00411946	1.12683	0.170975	0.00953409	0.20988	0.00140152
435	10025902378	NM_000046	ARSB	2.80603	0.00194591	0.00290495	1.17255	0.000139773	0.000196934	1.16407	2.60472e-05	2.74181e-05	1.16682	0.229725	0.000279644	0.251502	6.63891e-05
436	10025902413	NM_021920	SCT	2.1857	0.0172291	0.0134815	1.11312	0.00893134	0.0305356	1.10765	0.00154173	0.00781238	1.11505	0.190137	0.00275023	0.187791	0.0031091
437	10025902429	NM_020433	JPH2	3.33061	0.0273599	0.0181553	1.29541	0.00545144	0.00370175	1.31144	0.000347316	0.000420868	1.36081	0.219603	0.000936941	0.25391	0.000122004
438	10025902522	NM_032204	ASCC2	3.67224	0.068836	0.0714591	1.08609	0.0505216	0.0558594	1.082	0.00817943	0.00832885	1.09542	0.205574	0.00310627	0.205767	0.00307781
439	10025902527	NM_002778	PSAP	5.33068	0.00839126	0.00304121	1.21575	0.000507295	0.000427604	1.2349	7.67112e-05	9.36389e-05	1.23459	0.221555	0.000516601	0.222444	0.000489789
440	10025902557	NM_057162	KLHL4	2.74783	0.0091415	0.00864828	0.89808	0.00815827	0.0109056	0.910159	0.0221353	0.0314459	0.929999	-0.206332	0.00113473	-0.177809	0.00515886
441	10025902570	NM_006324	CFDP1	4.19705	0.00321293	0.00195789	0.899053	0.00398785	0.00221819	0.918596	0.00463986	0.00304842	0.933153	-0.215674	0.00104779	-0.205691	0.00179479
442	10025902606	NM_024838	THNSL1	2.92295	0.00144261	0.00417024	0.842585	0.00126469	0.00156361	0.868078	0.00843304	0.0073666	0.905989	-0.213462	0.000771084	-0.228916	0.000302824
443	10025902722	NM_001157	ANXA11	3.44903	0.00605851	0.00941175	1.13322	0.00121379	0.00162494	1.12968	0.000282645	0.000275493	1.12777	0.224593	0.00044226	0.219816	0.0005885
444	10025902765	NM_147780	CTSB	4.77012	1.81794e-05	2.3365e-05	1.51427	5.72205e-05	7.36117e-05	1.36658	4.70877e-05	3.06964e-05	1.33494	0.262823	5.45182e-05	0.27733	1.98122e-05
445	10025902776	NM_182740	PKD1L2	3.42284	0.00108725	0.00149983	0.621182	4.12464e-05	5.97239e-05	0.633391	4.64916e-06	3.8147e-06	0.651669	-0.270352	1.78513e-05	-0.324543	2.04467e-07
446	10025902829	NM_078481	CD97	3.86457	0.0263824	0.0293791	1.20305	0.00357723	0.00236374	1.22048	0.0010131	0.000273466	1.22887	0.205023	0.00128014	0.233451	0.000234286
447	10025902848	NM_001426	EN1	2.83282	0.0176522	0.0176807	1.40181	0.0031057	0.00315952	1.38291	0.0048154	0.00482023	1.31223	0.232419	0.000235752	0.224003	0.000399285
448	10025902874	NM_181608	KRTAP19-2	2.95532	0.0857013	0.263035	0.888126	0.00410658	0.0154878	0.856336	0.000183523	0.000422776	0.847049	-0.229311	0.000278881	-0.188361	0.00295902
449	10025902909	NM_004729	ZBED1	4.30789	0.0344228	0.0541584	1.08862	0.00679141	0.0105125	1.1037	0.00102687	0.00203908	1.10831	0.208963	0.00107529	0.196798	0.00209985
450	10025902956	NM_006555	YKT6	4.34864	0.00589085	0.00634974	1.14055	0.00178498	0.00184798	1.13755	0.00157136	0.00222075	1.118	0.213708	0.000929857	0.213732	0.000928602
451	10025902967	NM_153267	MAMDC2	4.02265	0.0278276	0.0172971	1.32602	0.00717366	0.00602257	1.3091	0.00100333	0.00180358	1.3227	0.177454	0.00525008	0.184598	0.00366591
452	10025902976	NM_021063	HIST1H2BD	1.97415	0.000133395	0.000132203	1.268	0.00144756	0.00214845	1.20498	0.00848395	0.00109738	1.15413	0.216144	0.000625602	0.244461	0.000103784
453	10025902997	NM_012326	MAPRE3	3.25796	0.114125	0.130167	1.07538	0.0147496	0.0145177	1.09232	0.00801963	0.00619674	1.08876	0.17827	0.00522589	0.167913	0.00858648
454	10025903008	NM_002086	GRB2	3.05012	0.0035122	0.00298762	1.08091	0.00146979	0.00181591	1.06514	0.00658912	0.0106052	1.04803	0.213508	0.00106675	0.201961	0.00199162
455	10025903087	NM_021006	CCL3L1	3.09722	0.00440514	0.0049746	0.899194	0.0190207	0.0203815	0.932705	0.00809121	0.013488	0.937293	-0.176244	0.00567084	-0.18856	0.00304688
456	10025903092	NM_182906	CLEC10A	3.46232	0.00434536	0.00449586	1.44606	0.000225484	0.000325978	1.45607	0.000534296	0.000476658	1.36388	0.233093	0.000490724	0.241107	0.000307121
457	10025903112	NM_174941	CD163L1	3.23221	0.0054552	0.0102325	1.28974	0.0270517	0.0354159	1.18403	0.00544959	0.00911838	1.19684	0.189058	0.00291038	0.181205	0.00435476
458	10025903192	NM_007207	DUSP10	3.0511	0.0299056	0.0378396	1.2077	0.0171133	0.0172319	1.17244	0.00477511	0.00505596	1.17876	0.216144	0.00064193	0.184693	0.00364811
459	10025903246	NM_020533	MCOLN1	3.28745	0.00529581	0.0110478	1.108	0.0003227	0.00122541	1.11796	0.000739098	0.000369072	1.10356	0.194354	0.0021526	0.203075	0.00133249
460	10025903262	NM_181361	KCNMB2	2.31693	0.0027554	0.00617611	0.746493	0.00061667	0.00129414	0.765684	0.000285149	0.000746727	0.786493	-0.264922	2.56008e-05	-0.215968	0.000648669
461	10025903286	NM_013304	ZDHHC1	3.65874	0.00307643	0.00373548	1.09538	0.00167525	0.00167143	1.08382	0.000824988	0.000269949	1.08125	0.17383	0.00637676	0.180009	0.00470899
462	10025903289	NM_015476	C18orf10	3.9403	0.000798225	0.00101137	1.23789	0.000352919	0.000428557	1.203	0.000140607	0.000280201	1.20625	0.235796	0.000184099	0.241709	0.00012479
463	10025903293	NM_004000	CHI3L2	3.33688	0.000671625	0.00129557	1.36228	0.00033915	0.00152218	1.32715	0.00132006	0.00746322	1.23912	0.240467	0.000135513	0.20626	0.00111285
464	10025903334	NM_182511	CBLN2	2.91419	0.012428	0.00304121	0.657603	0.00542188	0.00214845	0.682453	0.00364721	0.00140995	0.717592	-0.211318	0.000831483	-0.220334	0.000486248
465	10025903348	NM_019901	ABCC1	3.22621	0.00478625	0.00617611	1.1789	0.00072974	0.000328004	1.16431	3.66569e-05	1.88351e-05	1.17316	0.29302	2.93298e-06	0.286559	4.92943e-06
466	10025903349	NM_017817	RAB20	3.79469	0.000635266	0.00190711	1.24135	0.000327468	0.000526011	1.20702	0.00511599	0.0029546	1.14962	0.233505	0.000213476	0.24968	7.27428e-05
467	10025903353	NM_003782	B3GALT4	3.56797	0.0171491	0.0820872	1.09663	0.00352347	0.00357688	1.1014	0.00281692	0.00143164	1.09419	0.201739	0.00146867	0.21107	0.000864556
468	10025903420	NM_181503	EXOSC8	3.3882	0.146541	0.110935	0.946156	0.00781667	0.00488812	0.921288	0.00220084	0.00112277	0.921575	-0.178361	0.00680885	-0.199043	0.00247877
469	10025903433	NM_133171	ELMO2	3.85381	0.177368	0.165522	1.04683	0.0305937	0.040001	1.0668	0.000322759	0.000644445	1.09875	0.203512	0.00163554	0.204331	0.00156454
470	10025903499	NM_173083	LIN9	2.99183	0.123619	0.084595	0.911499	0.012399	0.00910252	0.886986	0.00414067	0.00254023	0.891436	-0.184137	0.00375327	-0.209216	0.000962294
471	10025903515	NM_018986	SH3TC1	3.1824	0.0368447	0.0772519	1.12589	0.0025326	0.00349426	1.14076	0.000382602	0.000619292	1.14859	0.202906	0.00134523	0.195801	0.00199061
472	10025903574	NM_024532	SPAG16	3.01627	0.027024	0.0627463	0.963838	0.00634652	0.0187911	0.964353	0.00229359	0.0054943	0.966947	-0.174757	0.00609686	-0.182698	0.00411454
473	10025903616	NM_032421	CLIP2	3.25872	0.121998	0.126631	1.0808	0.00714642	0.0099678	1.11176	0.000327706	0.000475764	1.14004	0.174872	0.00595939	0.189677	0.00281753
474	10025903731	NM_007127	VIL1	2.45997	0.0248809	0.00978267	1.07587	0.00098747	0.000337958	1.09131	9.23276e-05	4.24385e-05	1.08992	0.219964	0.00049728	0.249089	7.57588e-05
475	10025903762	NM_144974	CCDC122	2.73728	0.167025	0.0205624	0.938376	0.0270745	0.0024268	0.913069	0.00686461	0.00183559	0.90868	-0.167654	0.00841799	-0.169594	0.0076811
476	10025903803	NM_130459	TOR2A	2.95432	0.00525957	0.00455636	1.07437	0.00238746	0.000955939	1.06365	0.000745475	0.000439465	1.06266	0.201214	0.00151209	0.203371	0.00134089
477	10025903809	NM_018090	NECAP2	4.09925	0.0110865	0.0170181	1.13996	0.00284719	0.00705832	1.12263	0.00201029	0.00474387	1.10949	0.181335	0.00440684	0.189894	0.0028422
478	10025903813	NM_000391	TPP1	4.46315	0.0110999	0.0101892	1.17759	0.000972807	0.00129414	1.21493	1.57356e-05	2.11596e-05	1.24657	0.224264	0.00038223	0.238766	0.00015162
479	10025903977	NM_031918	KLF16	2.8492	0.0482439	0.0364073	1.07337	0.00669771	0.00628305	1.08265	0.000615358	0.00102472	1.09658	0.167358	0.00909602	0.177263	0.00568858
480	10025903988	NM_005931	MICB	3.3614	0.00940126	0.00159228	1.18452	0.00114244	0.000447929	1.18416	0.00195074	0.000513613	1.15498	0.176228	0.00664421	0.216627	0.000807859
481	10025903994	NM_021575	AP2S1	4.30035	0.0145414	0.0226465	1.13757	0.00246137	0.0052467	1.143	0.00279021	0.00810683	1.12202	0.189085	0.00302453	0.19306	0.00245569
482	10025904019	NM_014506	TOR1B	3.57402	0.004484	0.00795883	1.12977	0.0122121	0.0221516	1.09389	0.00482011	0.0105735	1.08667	0.197382	0.00194892	0.201966	0.00151729
483	10025904059	NM_013416	NCF4	2.81615	1.5974e-05	5.04255e-05	1.3238	0.000201583	0.000323236	1.2258	0.0041582	0.00211102	1.16216	0.218263	0.000565711	0.21797	0.000575734
484	10025904089	NM_002468	MYD88	4.16033	0.0192149	0.0238454	1.14894	0.00279337	0.00283867	1.14302	0.00748354	0.00554615	1.11874	0.186913	0.00325406	0.188232	0.00303856
485	10025904143	NM_024510	C17orf62	3.83794	0.0246287	0.0325301	1.10138	0.0111485	0.00849378	1.08903	0.00870424	0.00984007	1.08236	0.184641	0.00442773	0.186663	0.00400613
486	10025904147	NM_015474	SAMHD1	3.30901	0.00837034	0.00731903	1.2011	0.00959557	0.00705832	1.15572	0.00148189	0.000898182	1.17434	0.191634	0.00254134	0.228957	0.000293483
487	10025904164	NM_172140	IL29	2.19316	0.175997	0.0749229	1.05217	0.0206152	0.0133076	1.07336	0.00322878	0.00124466	1.07927	0.190071	0.00270472	0.202683	0.0013621
488	10025904197	NM_030796	VOPP1	4.232	0.0202187	0.00978267	1.12419	0.00311571	0.00260609	1.12526	0.00226307	0.00256336	1.11141	0.213336	0.000776811	0.218064	0.000587666
489	10025904209	NM_002925	RGS10	4.18683	0.000319421	0.000746727	1.27848	0.000525475	0.000932455	1.20274	0.0058465	0.00487858	1.13975	0.179664	0.0050584	0.201578	0.00162157
490	10025904223	NM_147204	TRPV4	3.37949	0.0202598	0.0413254	1.10153	0.00772715	0.0182943	1.0936	0.000121474	0.000454426	1.12024	0.201301	0.00225662	0.219804	0.000832698
491	10025904251	NM_022733	SMAP2	3.56584	0.00611603	0.00544399	1.25585	0.00108236	0.000124276	1.24155	0.00284731	5.74589e-05	1.19262	0.247124	0.000186948	0.285231	1.45452e-05
492	10025904269	NM_032133	MYCBPAP	2.63684	0.00156128	0.00304121	0.818394	0.00165093	0.00188386	0.858952	0.000464141	0.000439465	0.86402	-0.195247	0.00209517	-0.218433	0.000559967
493	10025904371	NM_000404	GLB1	4.02227	0.000188053	0.000218928	1.25539	6.83069e-05	8.35657e-05	1.2125	3.8147e-05	3.15309e-05	1.20138	0.27283	1.54532e-05	0.27831	1.0218e-05
494	10025904422	NM_005583	LYL1	3.01902	0.00392568	0.00612551	1.17307	0.00215054	0.00126928	1.13587	9.42349e-05	4.75049e-05	1.14751	0.266966	2.29155e-05	0.26267	3.13064e-05
495	10025904442	NM_002990	CCL22	2.73329	0.0117716	0.0110478	1.16792	0.00641406	0.00285429	1.15297	0.000564396	0.000269294	1.15953	0.19978	0.00163677	0.228061	0.000310454
496	10025904472	NM_004848	C1orf38	3.85051	0.000119328	0.000443757	1.41207	5.25713e-05	0.000110924	1.33553	0.000569165	0.000341296	1.26605	0.268961	1.90235e-05	0.257932	4.23277e-05
497	10025904474	NM_005158	ABL2	2.81896	0.00120139	0.00333136	1.07779	3.89814e-05	0.000152826	1.0837	4.26769e-05	6.70552e-05	1.08177	0.25122	6.76951e-05	0.259341	3.82903e-05
498	10025904484	NM_005675	DGCR6	3.6751	0.128458	0.371328	0.88086	0.00511533	0.0208085	0.829687	0.000234425	0.000369072	0.813386	-0.207815	0.00104282	-0.193804	0.00226403
499	10025904515	NM_152851	MS4A6A	3.66841	0.000612617	0.000746727	1.4255	0.000409484	0.000441372	1.3443	0.000551224	0.000398934	1.29109	0.201502	0.00145504	0.21837	0.000547549
500	10025904517	NM_052820	CORO2A	2.76513	0.0153549	0.019074	1.14459	0.0155327	0.0265729	1.11218	0.00332636	0.0083006	1.1172	0.174194	0.00605483	0.174723	0.00590029
501	10025904523	NM_138768	MYEOV	2.44643	0.00918502	0.0136293	1.38047	0.00942558	0.00559938	1.30421	0.00319833	0.00218558	1.28228	0.203032	0.00136655	0.19407	0.00223196
502	10025904530	NM_078628	MSL3	2.62014	0.0317351	0.0391592	1.12355	0.0133407	0.019146	1.10517	0.00913298	0.00817603	1.10015	0.173283	0.00632913	0.182625	0.00397833
503	10025904600	NM_015136	STAB1	3.55285	0.00120121	0.00178796	1.33187	0.000645995	0.00078994	1.26457	0.000143647	6.30021e-05	1.26407	0.26088	4.9728e-05	0.241835	0.000175953
504	10025904611	NM_181720	ARHGAP30	3.48908	0.000763595	0.00105667	1.32172	0.000156224	0.00013423	1.27726	8.37445e-05	4.6432e-05	1.25054	0.26214	4.73215e-05	0.292219	5.22428e-06
505	10025904637	NM_004244	CD163	4.56758	0.00663435	0.00728196	1.29626	0.00936782	0.0151809	1.24171	0.00194097	0.00235099	1.24699	0.191412	0.00284791	0.18563	0.0038287
506	10025904653	NM_018255	ELP2	3.69361	0.00143081	0.000869751	0.901717	0.000252903	0.000428557	0.909589	0.000185072	0.000297368	0.921317	-0.221172	0.000462077	-0.218605	0.000539858
507	10025904666	NM_020960	GPR107	2.41046	0.0375595	0.0205624	1.13184	0.0649283	0.0464506	1.0891	0.00594389	0.00817603	1.11982	0.186376	0.00328141	0.20412	0.00125645
508	10025904700	NM_175568	P2RX4	3.54226	0.00493652	0.00623578	1.17744	0.000809491	0.00167263	1.16809	0.00955731	0.00682419	1.12076	0.176587	0.00608835	0.193147	0.00265628
509	10025904711	NM_016293	BIN2	3.42163	0.024465	0.028581	1.23536	0.00809997	0.00705832	1.20313	0.0114631	0.00390947	1.18659	0.179002	0.00477552	0.186982	0.00317978
510	10025904760	NM_024599	RHBDF2	3.79836	0.0319966	0.0682771	1.20138	0.00157398	0.00300336	1.22435	0.000179887	0.000369072	1.25699	0.229395	0.000277402	0.210944	0.000849782
511	10025904814	NM_001185	AZGP1	2.49308	0.000104129	0.000185609	0.808252	2.0504e-05	2.47955e-05	0.833392	7.33137e-06	1.71661e-05	0.847225	-0.28185	6.83747e-06	-0.27894	8.57504e-06
512	10025904951	NM_022349	MS4A6A	4.02756	0.00179803	0.00181836	1.35322	0.00892544	0.00712419	1.23552	0.0105211	0.00545842	1.19832	0.168142	0.00849487	0.190182	0.00285673
513	10025904959	NM_004313	ARRB2	4.00671	0.000648916	0.00129515	1.27389	5.54919e-05	6.68168e-05	1.24332	0.000105262	5.60284e-05	1.21215	0.253834	5.84879e-05	0.269083	1.96104e-05
514	10025905015	NM_015141	GPD1L	3.69514	0.000190318	0.000547647	0.787669	0.000247478	0.000721514	0.833501	0.00474006	0.00366253	0.874602	-0.197659	0.00179897	-0.21411	0.000705855
515	10025905099	NM_004631	LRP8	2.22968	0.0153177	0.0119701	1.17311	0.0126222	0.0127367	1.13332	0.00147194	0.00254023	1.14574	0.200542	0.00153478	0.209546	0.000921578
516	10025905102	NM_015103	PLXND1	4.28962	0.120703	0.139341	1.09544	0.0279565	0.0181885	1.11372	0.00634325	0.00438631	1.12319	0.189701	0.00475209	0.181074	0.00708632
517	10025905115	NM_014403	ST6GALNAC4	3.3465	0.00960267	0.0378396	1.13785	0.00387228	0.0172319	1.1194	0.00262946	0.00629968	1.11305	0.19841	0.00176461	0.177676	0.00519279
518	10025905126	NM_153361		2.38135	0.018386	0.00978267	1.10223	0.0108003	0.00518042	1.09577	0.000634074	0.000391245	1.10912	0.213518	0.000730934	0.229116	0.000282339
519	10025905135	NM_014369	PTPN18	3.37868	0.031302	0.0304955	1.16725	0.00616604	0.004417	1.14877	0.000201285	0.000111163	1.1655	0.210616	0.00128229	0.234813	0.000318276
520	10025905148	NM_004210	NEURL	4.32129	0.0751866	0.174279	0.815275	0.00182277	0.00722545	0.750266	0.000199378	0.000111818	0.752096	-0.210406	0.00087681	-0.213679	0.000724023
521	10025905194	NM_024832	RIN3	3.03456	0.0377541	0.0183658	1.12513	0.0129294	0.00199175	1.11283	0.00155008	0.000123084	1.131	0.187675	0.00338418	0.225981	0.000395339
522	10025905202	NM_000861	HRH1	2.97442	0.00532126	0.00529671	1.2628	0.00407165	0.00367302	1.21884	0.000228822	0.000266314	1.2427	0.204814	0.00135679	0.205529	0.00130393
523	10025905203	NM_152284	CHMP4C	2.34847	0.232076	0.3266	0.944484	0.0228585	0.0231095	0.917281	0.00106973	0.00137621	0.897347	-0.1704	0.00763929	-0.186587	0.00344063
524	10025905248	NM_000519	HBD	2.62576	0.00386554	0.00190711	1.70416	0.00657672	0.00739616	1.43924	0.0177377	0.0244212	1.29501	0.227018	0.000322105	0.194034	0.00218996
525	10025905262	NM_014385	SIGLEC7	2.40155	0.00435633	0.00129557	1.16117	0.00221622	0.000428557	1.13193	0.000794172	0.000137746	1.13014	0.201085	0.00148921	0.270286	1.65664e-05
526	10025905294	NM_001191	BCL2L1	4.28576	0.0025925	0.000977516	1.21574	0.000199676	0.000142753	1.20125	8.38637e-05	0.000106215	1.1736	0.287966	5.52468e-06	0.266558	2.75664e-05
527	10025905349	NM_032782	HAVCR2	3.29467	0.000805914	0.00143355	1.33947	0.000803947	0.00247091	1.27874	0.000142813	0.000231028	1.27732	0.222294	0.000455547	0.235585	0.000198325
528	10025905352	NM_014604	TAX1BP3	3.87101	0.00367057	0.00252897	1.17436	0.0025118	0.00349426	1.13708	0.0112832	0.0102315	1.10122	0.176461	0.00541775	0.172512	0.00657
529	10025905402	NM_004148	NINJ1	3.58505	1.84774e-06	1.31726e-05	1.40196	2.34842e-05	1.26958e-05	1.27274	0.000299394	0.000129461	1.20721	0.265289	2.39876e-05	0.243536	0.000110442
530	10025905525	NM_152304	RAB42	3.15759	0.00238133	0.00219798	1.20898	0.00151891	0.000681579	1.17016	0.00153047	0.000555217	1.15221	0.184795	0.00369899	0.198972	0.00174904
531	10025905645	NM_003255	TIMP2	4.01192	0.00545538	0.00364649	1.15025	0.00142527	0.000625491	1.13034	0.000586212	0.000169277	1.12124	0.226361	0.000335596	0.230164	0.000264233
532	10025905725	NM_017791	FLVCR2	3.31512	0.0148085	0.0149422	1.1707	0.0013274	0.00121516	1.18356	0.000150561	0.000171125	1.20021	0.235431	0.000325803	0.257116	8.2867e-05
533	10025905737	NM_016274	PLEKHO1	4.37747	0.00601804	0.00476134	1.21464	0.00118637	0.000681579	1.189	0.00840861	0.00183451	1.13973	0.187687	0.0030651	0.199781	0.00160085
534	10025905779	NM_152906	C22orf25	3.41816	0.000102639	0.000128567	1.18718	5.42998e-05	1.64509e-05	1.15958	5.00679e-06	1.49012e-06	1.15626	0.294737	3.38729e-06	0.317325	5.14902e-07
535	10025905789	NM_021706	LAIR1	3.36898	0.0234191	0.00381404	1.14431	0.00245047	0.000680149	1.15291	0.00408882	0.000172675	1.13971	0.176363	0.00637413	0.215861	0.000801663
536	10025905817	NM_013345	GPR132	2.36787	0.0112901	0.0145806	1.17444	0.00431544	0.0049355	1.15451	0.0130192	0.00723833	1.12055	0.175544	0.00566767	0.215413	0.000653414
537	10025905835	NM_000616	CD4	3.24604	0.0140343	0.0106108	1.14316	0.00323313	0.00376618	1.13197	0.000341833	0.000328183	1.14656	0.207491	0.00103734	0.213598	0.000727479
538	10025905836	NM_173662	RNF175	2.42731	0.0105031	0.0205624	0.669875	0.028236	0.0265729	0.75821	0.00854945	0.00817603	0.752913	-0.182705	0.00396207	-0.192641	0.00235978
539	10025905837	NM_057178	RFFL	2.28826	0.00321198	0.00199992	1.21403	0.010767	0.0108311	1.13644	0.00124681	0.00474626	1.16002	0.242136	0.000129318	0.248123	8.65745e-05
540	10025905873	NM_144767	AKAP13	4.02244	0.0561001	0.0875353	1.08739	0.00644761	0.00934726	1.09668	0.000645995	0.00077945	1.10297	0.172271	0.00760168	0.183205	0.0044899
541	10025905874	NM_022141	PARVG	3.08615	0.00409031	0.00242627	1.2403	0.000779092	0.000426352	1.20994	0.00209886	0.000631034	1.17315	0.205319	0.00162801	0.234495	0.000305456
542	10025905876	NM_015196	KIAA0922	3.75872	1.13845e-05	2.05636e-05	0.78089	5.67436e-05	6.38366e-05	0.839494	0.00303543	0.00210625	0.891143	-0.217088	0.000591345	-0.205801	0.00114236
543	10025905984	NM_002404	MFAP4	4.54881	0.000982881	0.00158125	1.259	0.000741661	0.000942826	1.22188	0.00077945	0.00166827	1.19773	0.208744	0.00114244	0.186969	0.00364837
544	10025905994	NM_003974	DOK2	2.50387	0.00361276	0.00181836	1.26782	0.00131965	0.000701308	1.23063	0.000616193	0.000152767	1.22592	0.202223	0.00142966	0.241826	0.000127843
545	10025906085	NM_032717	AGPAT9	3.1404	0.000960708	0.00173336	0.696153	0.00214511	0.00136638	0.75827	0.00287402	0.00423944	0.791725	-0.218316	0.000549334	-0.231724	0.000239262
546	10025906102	NM_173576	MKX	2.96249	0.000919402	0.001652	0.592347	0.00859773	0.0116596	0.721663	0.00118148	0.0015133	0.709537	-0.224207	0.000383587	-0.226861	0.000325281
547	10025906113	NM_153367	ZCCHC24	4.71951	0.131476	0.0661726	1.08535	0.0246598	0.011152	1.10614	0.00672233	0.00315785	1.11317	0.172244	0.00665538	0.188094	0.00300071
548	10025906120	NM_145248	C13orf28	2.00114	0.0588946	0.0221511	0.924155	0.00823051	0.00264329	0.894472	0.0191098	0.0159888	0.924876	-0.198447	0.00172291	-0.181945	0.00411805
549	10025906170	NM_014836	RHOBTB1	2.72272	0.00500178	0.00542724	1.15739	0.0147076	0.0255257	1.1094	0.0107182	0.0271417	1.09578	0.201003	0.00152991	0.190054	0.00276232
550	10025906230	NM_006717	SPIN1	3.36325	0.00202566	0.00721496	0.90556	0.0293552	0.0234306	0.942993	0.0616135	0.0409258	0.958588	-0.176063	0.00613535	-0.172853	0.00715109
551	10025906331	NM_004068	AP2M1	4.5879	0.0357967	0.0583388	1.11144	0.0109078	0.018118	1.10593	0.00185656	0.00268894	1.11915	0.186678	0.00628549	0.198937	0.00355123
552	10025906351	NM_139238	ADAMTSL1	3.00563	0.00692475	0.00304121	1.06705	0.00902891	0.0116596	1.05357	0.00903028	0.00629968	1.04807	0.186059	0.00333571	0.185142	0.0034974
553	10025906398	NM_173542	PLBD2	2.56773	0.0113603	0.0183658	1.09201	0.00174338	0.00376618	1.09396	1.43647e-05	2.5928e-05	1.10668	0.219489	0.00052554	0.208941	0.000977642
554	10025906459	NM_012305	AP2A2	4.46197	0.133615	0.0786897	1.12474	0.00600016	0.00342482	1.18927	0.000877619	0.000575185	1.19388	0.191034	0.003635	0.222525	0.000676112
555	10025906463	NM_012210	TRIM32	3.71304	0.0485945	0.0772519	1.07671	0.00394118	0.00830489	1.09448	0.00106251	0.0025835	1.08854	0.183448	0.00381488	0.173846	0.00615813
556	10025906486	NM_024531	GPR172A	3.69275	0.0419958	0.019074	1.09211	0.00762063	0.00292796	1.09502	0.00110406	0.000504196	1.10622	0.208621	0.00102	0.227605	0.000328637
557	10025906497	NM_032316	NICN1	3.42801	0.0624467	0.0546405	1.08881	0.0420439	0.0490856	1.08088	0.00570428	0.005647	1.0981	0.175707	0.00562262	0.167071	0.00851526
558	10025906557	NM_001384	DPH2	3.48322	0.0566775	0.0419415	1.09566	0.0518742	0.0542766	1.07678	0.00572896	0.0051496	1.09077	0.181684	0.00457766	0.176641	0.00586284
559	10025906666	NM_022664	ECM1	3.05074	0.00647712	0.00901264	1.28794	0.00423163	0.00722545	1.24422	0.0010733	0.00117946	1.23588	0.188192	0.003045	0.182016	0.00418027
560	10025906737	NM_004946	DOCK2	3.6292	0.00335962	0.00644565	1.27008	0.000706971	0.00106811	1.25158	0.000188112	0.000174522	1.25277	0.227897	0.000322722	0.239236	0.000156497
561	10025906745	NM_144650	ADHFE1	3.54924	0.00443065	0.0101892	0.823938	0.00395876	0.00722545	0.851498	0.00541848	0.0100814	0.867537	-0.165513	0.00915939	-0.187926	0.0030271
562	10025906796	NM_174983	C19orf28	3.15674	0.00468946	0.0039885	1.10168	0.00255853	0.00232309	1.08998	0.000522494	0.000253618	1.08663	0.189476	0.00279092	0.193452	0.00225947
563	10025906820	NM_152658	THAP8	2.99624	0.00933111	0.0306907	1.17155	0.00369692	0.0142063	1.13726	0.00967193	0.00832277	1.11854	0.216205	0.000639595	0.179916	0.00464554
564	10025906830	NM_177403	RAB7B	3.12281	0.00256145	0.00476134	1.229	0.000100732	0.000138521	1.22369	6.87242e-05	4.24385e-05	1.20816	0.20468	0.00121733	0.250033	7.09925e-05
565	10025906898	NM_032962	CCL14	3.85114	0.00058794	0.00209677	1.36416	0.0447465	0.0508136	1.18256	0.0519686	0.0530348	1.14487	0.225894	0.000397436	0.174229	0.00658469
566	10025906913	NM_021209	NLRC4	3.26893	0.0136194	0.0101892	1.30095	0.00339794	0.00226349	1.2867	0.000939548	0.000447989	1.28905	0.193969	0.0022916	0.222116	0.000460497
567	10025906915	NM_176895	PPAP2A	4.73389	0.00289255	0.00241387	1.2355	0.0062741	0.00470114	1.17048	0.0182475	0.0146915	1.13531	0.181094	0.00429919	0.176614	0.00537677
568	10025906933	NM_007261	CD300A	2.8369	0.00193244	0.00181836	1.35524	0.00100112	0.00103897	1.29389	0.00646496	0.00482023	1.2273	0.202683	0.00136212	0.213484	0.000732374
569	10025906946	NM_139235	NOL6	2.92512	0.15736	0.149006	1.08133	0.0250614	0.0255257	1.10253	0.0014205	0.00234199	1.13159	0.203497	0.00136234	0.206999	0.00111864
570	10025907041	NM_031464	RPS6KL1	2.70898	0.00210941	0.00348568	1.1445	0.0122735	0.0179764	1.0924	0.00292844	0.00354439	1.10022	0.236334	0.000183282	0.193174	0.00234155
571	10025907076	NM_182608	ANKRD33	3.82672	0.00325227	0.0039885	1.09848	0.000366747	0.000354111	1.09979	1.26362e-05	9.53674e-06	1.11083	0.241808	0.000155073	0.259194	4.82124e-05
572	10025907163	NM_173710		5.62398	0.00189316	0.00620776	0.707052	0.00102717	0.00393808	0.75997	0.0148933	0.0218207	0.839839	-0.207504	0.0014128	-0.172953	0.00801318
573	10025907194	NM_000193	SHH	2.97246	0.000862002	0.000698507	1.12907	0.000725985	0.000522554	1.1077	0.000227094	0.000174522	1.10418	0.228159	0.000326693	0.215295	0.000710379
574	10025907244	NM_052860	ZNF300	3.27279	0.0030396	0.0042848	0.945737	0.00513041	0.00616991	0.956001	0.00530791	0.00340062	0.960548	-0.177116	0.00533859	-0.185379	0.00352198
575	10025907246	NM_004256	SLC22A13	3.70674	0.102844	0.223302	0.794628	0.00497925	0.027657	0.733662	0.000480831	0.000655234	0.727393	-0.184259	0.0036598	-0.179577	0.00464028
576	10025907321	NM_002094	GSPT1	3.96398	0.0858324	0.14508	1.0735	0.0115425	0.0305356	1.08399	0.000251591	0.000948906	1.10323	0.241756	0.000128438	0.219392	0.000528611
577	10025907345	NM_018404	ADAP2	3.8775	0.000103951	0.000230551	1.37487	9.41753e-06	5.23329e-05	1.33328	0.00015825	6.64592e-05	1.26241	0.269295	0.000106409	0.29133	2.59374e-05
578	10025907372	NM_014397	NEK6	3.32767	0.0142051	0.0183658	1.10754	0.00277203	0.00426233	1.10308	0.00127345	0.0016523	1.10297	0.213511	0.000731201	0.191863	0.00245974
579	10025907380	NM_003809	TNFSF12	3.75339	0.0214645	0.0205624	1.08839	0.00849688	0.00675362	1.08429	0.0065943	0.00600487	1.07494	0.177714	0.00608282	0.174137	0.00720541
580	10025907419	NM_018897	DNAH7	2.66104	0.0100032	0.0221511	0.916446	0.00225484	0.00483251	0.923094	0.0249572	0.0314459	0.949731	-0.171928	0.00687167	-0.165543	0.00928998
581	10025907443	NM_145279	MOBKL2C	2.94604	0.00528461	0.00252897	1.15906	0.00200957	0.00140387	1.14324	0.00102001	0.000439465	1.13397	0.211123	0.000861922	0.211087	0.000863727
582	10025907495	NM_139179	DAGLB	3.18248	0.0896559	0.0317948	1.09507	0.0134831	0.00367349	1.10586	0.00162005	0.000315487	1.11506	0.197945	0.00177103	0.206743	0.00108264
583	10025907542	NM_030899	ZNF323	2.86638	0.174023	0.084595	0.89147	0.00789595	0.00183469	0.845412	0.00687319	0.00290573	0.868659	-0.171036	0.00705407	-0.169036	0.00776027
584	10025907703	NM_153047	FYN	4.34627	0.00306559	0.00341904	1.12738	6.91414e-05	0.000112772	1.14431	7.86781e-06	2.80738e-05	1.1389	0.246258	9.82031e-05	0.249384	7.94557e-05
585	10025907711	NM_000233	LHCGR	2.78113	0.00748807	0.00939059	1.45606	0.00502718	0.00952637	1.40336	0.00522858	0.0096426	1.37143	0.186475	0.00332851	0.185029	0.00358572
586	10025907715	NM_176798	P2RY6	2.93214	0.0129667	0.00939059	1.22591	0.00334156	0.00220525	1.20385	0.00804514	0.00300425	1.17849	0.17397	0.00612115	0.191221	0.00254504
587	10025907881	NM_004072	CMKLR1	2.49712	0.0180094	0.036558	1.16258	0.0037145	0.0115933	1.15334	0.000700831	0.00457281	1.15705	0.217519	0.000591439	0.17877	0.00491868
588	10025907895	NM_001666	ARHGAP4	3.32712	0.00215846	0.00202042	1.19021	0.0011369	0.00101918	1.15443	0.000395	0.000292718	1.15452	0.226182	0.000413083	0.239213	0.000183308
589	10025907906	NM_016161	A4GNT	3.34319	0.0941258	0.211308	0.848194	0.00729764	0.0220503	0.813352	0.000415027	0.000644445	0.799715	-0.227317	0.000396658	-0.20382	0.0015361
590	10025907969	NM_138566	GLS2	4.17798	0.100982	0.201188	0.794314	0.00386483	0.0138487	0.730322	0.000605941	0.000433922	0.737693	-0.222377	0.000563417	-0.215843	0.000823393
591	10025908006	NM_152342	CDYL2	2.40719	0.0325186	0.0265975	1.11425	0.0183916	0.0212433	1.10381	0.00493413	0.00649828	1.11009	0.191405	0.00252031	0.202099	0.00140735
592	10025908042	NM_024507	KREMEN2	2.76397	4.63128e-05	0.000107288	0.891607	0.0030359	0.00213689	0.93187	0.0476419	0.0515054	0.959607	-0.201589	0.00151469	-0.205255	0.00123449
593	10025908090	NM_000941	POR	4.15973	0.0486305	0.045027	1.12216	0.0151397	0.0132031	1.12142	0.00247639	0.00177693	1.13319	0.208423	0.00105663	0.185081	0.00371587
594	10025908094	NM_004104	FASN	5.20334	0.000469148	0.000914752	0.570216	0.00885582	0.0109056	0.71121	0.0122836	0.0183753	0.765459	-0.180307	0.00447318	-0.190674	0.00262001
595	10025908110	NM_005990	STK10	3.38734	0.00623143	0.0101892	1.19849	0.0010193	0.000808001	1.1854	0.000233948	0.000132143	1.18113	0.249048	7.59731e-05	0.250894	6.68951e-05
596	10025908234	NM_020806	GPHN	3.20897	0.00659895	0.0203528	0.870813	0.00207323	0.00412738	0.883077	0.0104147	0.0179484	0.914849	-0.180913	0.00604335	-0.189831	0.00393655
597	10025908306	NM_033504	TMEM54	2.84695	0.00609714	0.0145806	1.11359	0.00687301	0.0109056	1.08456	0.00649559	0.00403857	1.07898	0.190692	0.00267097	0.18851	0.00299495
598	10025908323	NM_144671	FAM109A	3.18672	0.00210595	0.00364649	1.20478	0.000384629	0.000441372	1.18629	3.26037e-05	4.73857e-05	1.18754	0.276953	9.99453e-06	0.25221	6.1059e-05
599	10025908393	NM_002865	RAB2A	3.71531	0.000703216	0.00269395	1.18618	0.0120313	0.0320922	1.11044	0.047169	0.0824474	1.07548	0.189628	0.00282479	0.168696	0.0080149
600	10025908430	NM_147193	GLIS1	3.09025	0.00015521	0.00016588	0.8906	0.00217611	0.00116771	0.925958	0.0165589	0.00523388	0.947479	-0.18476	0.00377713	-0.202831	0.00144637
601	10025908435	NM_057158	DUSP4	3.6294	0.00161755	0.000869751	0.666836	0.0177264	0.00922322	0.767175	0.0174214	0.0110793	0.795306	-0.19648	0.0019601	-0.204888	0.00123132
602	10025908445	NM_024061	ZNF655	3.23717	0.00494921	0.00984245	1.16186	0.0213922	0.0239462	1.10258	0.0395974	0.0435247	1.08923	0.165126	0.00992248	0.176009	0.0059401
603	10025908543	NM_024884	L2HGDH	2.52003	0.00995201	0.00864828	0.849804	0.00541449	0.00598246	0.874278	0.00669497	0.00649828	0.883944	-0.222638	0.000434132	-0.207337	0.00107166
604	10025908566	NM_145041	TMEM106A	3.14638	0.00455135	0.00513101	1.18013	0.000798047	0.00149733	1.16233	0.0013181	0.00188875	1.13949	0.190022	0.00282319	0.183608	0.00392933
605	10025908605	NM_153347	TMEM86A	2.73654	0.0156458	0.019806	1.13143	0.00194413	0.00203878	1.12779	0.000397384	0.000738621	1.13323	0.18435	0.00371263	0.200898	0.00153879
606	10025908613	NM_033161	SURF4	4.73899	0.0512291	0.0546405	1.13232	0.015553	0.0158151	1.1326	0.00397873	0.00412059	1.13769	0.177556	0.00602101	0.183101	0.0045988
607	10025908712	NM_003813	ADAM21	2.65963	0.00020498	0.000185609	0.890025	0.00362277	0.00251067	0.928343	0.0068031	0.00538647	0.941255	-0.17363	0.00643875	-0.195441	0.00211794
608	10025908764	NM_033387	FAM78A	2.86509	0.00559473	0.0101892	1.25824	0.00205421	0.00297427	1.21249	0.000318766	0.000584364	1.2106	0.246335	0.000107919	0.217145	0.000671004
609	10025908777	NM_000491	C1QB	4.54655	0.00049597	0.00100475	1.38281	0.000642657	0.00253767	1.28529	0.000900209	0.000987828	1.25687	0.209123	0.00101534	0.212218	0.000849897
610	10025908781	NM_053056	CCND1	4.15315	0.00381011	0.00836313	1.40145	0.000548959	0.000338495	1.39707	2.00868e-05	1.32322e-05	1.43335	0.26803	4.12796e-05	0.282317	1.50587e-05
611	10025908812	NM_004911	PDIA4	3.56021	0.107285	0.0689904	1.10701	0.0113965	0.00802785	1.13553	0.000176013	0.000264466	1.1832	0.193248	0.00258786	0.20004	0.00180287
612	10025908826	NM_020820	PREX1	3.63662	0.00665659	0.00854522	1.3233	0.00154823	0.000508368	1.30967	0.00412691	0.000579178	1.24201	0.238432	0.000337946	0.241208	0.000286365
613	10025908828	NM_005545	ISLR	4.15606	0.0370556	0.0528919	1.17889	0.00474191	0.00830489	1.18426	0.000171661	0.000431061	1.20764	0.190742	0.00261053	0.195609	0.00201148
614	10025908831	NM_015668	RGS22	2.84757	0.00459522	0.00901264	0.76365	0.00264859	0.00584143	0.804072	0.00573909	0.0186303	0.842858	-0.193623	0.00223888	-0.204038	0.00126224
615	10025908928	NM_000243	MEFV	2.30215	0.00051415	0.000346601	1.12113	0.00810224	0.00137895	1.07504	0.0521583	0.000534296	1.06063	0.198576	0.00174859	0.269541	1.82211e-05
616	10025908947	NM_173860	HOXC12	2.79467	0.11185	0.0772519	1.03122	0.00819743	0.00308055	1.0471	0.00919819	0.00315785	1.0412	0.174862	0.00596206	0.19291	0.00237475
617	10025908969	NM_001183	ATP6AP1	4.61327	0.100463	0.268373	1.09429	0.00558454	0.0153345	1.12787	0.000513077	0.00131726	1.14405	0.215592	0.00113703	0.205958	0.00189937
618	10025909001	NM_021249	SNX6	3.9644	0.00243068	0.00476134	1.11048	0.00269145	0.00739616	1.09137	0.00129831	0.00237375	1.07841	0.217324	0.000583049	0.203057	0.00133387
619	10025909006	NM_138957	MAPK1	3.08693	0.000376463	0.000307918	1.16214	0.000671923	0.000777483	1.12523	0.0115036	0.00370711	1.08711	0.207198	0.00140274	0.244819	0.000150141
620	10025909011	NM_001219	CALU	3.67952	0.036043	0.0463582	1.12844	0.0294407	0.0245144	1.1084	0.00119418	0.00115842	1.14064	0.2002	0.00163521	0.192659	0.00245699
621	10025909013	NM_000572	IL10	2.78393	0.00228763	0.000576973	1.35505	0.00464636	0.00149733	1.24335	0.0508249	0.00345773	1.18375	0.175888	0.0058717	0.225887	0.000375936
622	10025909023	NM_152346	SLC43A2	3.59619	0.0346118	0.0568759	1.14653	0.00144219	0.00137895	1.18031	0.0041784	0.000874221	1.15663	0.210168	0.000956413	0.242554	0.000129897
623	10025909050	NM_017728	TMEM104	3.36905	0.0875863	0.0749229	1.0982	0.0171489	0.0195503	1.11169	0.000211298	0.000328183	1.1511	0.208127	0.00100016	0.206245	0.00111386
624	10025909057	NM_000803	FOLR2	4.16681	1.12653e-05	2.52724e-05	1.42166	3.39746e-06	8.46386e-06	1.33094	2.563e-05	9.65595e-06	1.27817	0.274072	1.40804e-05	0.282046	7.668e-06
625	10025909060	NM_002621	CFP	3.38934	0.0034532	0.00761104	1.35884	0.00351411	0.0141425	1.28759	0.00110811	0.00145429	1.29458	0.191494	0.00289439	0.197408	0.00212238
626	10025909061	NM_017600	GOLGA2B	2.26052	0.0107302	0.0027743	0.886737	0.00061667	0.00035876	0.869284	0.00121099	0.00249767	0.891451	-0.180525	0.0044245	-0.186189	0.00331321
627	10025909065	NM_016496	2012-03-02	4.0009	0.00909448	0.00978267	1.21603	0.00137484	0.00122541	1.19849	0.000524819	0.000563443	1.19388	0.225954	0.000344198	0.228459	0.000294264
628	10025909113	NM_182538	SPNS3	4.18853	0.190534	0.375044	0.831423	0.0116395	0.0296589	0.757786	0.00169408	0.000775993	0.751755	-0.19346	0.00261332	-0.193807	0.00256624
629	10025909187	NM_020689	SLC24A3	4.4766	0.00645113	0.00944036	1.17287	0.0129105	0.0127236	1.13338	0.00234342	0.00239623	1.15159	0.207504	0.001347	0.20947	0.00120864
630	10025909225	NM_015589	SAMD4A	3.23793	0.00140613	0.00364649	1.25941	0.00174576	0.00612646	1.18502	0.000539839	0.00124466	1.17932	0.26587	2.38882e-05	0.241485	0.000130766
631	10025909241	NM_006866	LILRA2	3.13987	0.00138175	0.000507593	1.43424	0.00257152	0.000360131	1.29419	0.0451744	0.00134683	1.19463	0.196579	0.00207937	0.225521	0.000395366
632	10025909265	NM_025199	GRB2	4.49717	0.000208557	0.000430644	1.17333	7.73072e-05	9.7692e-05	1.15415	4.43459e-05	4.27365e-05	1.14014	0.289093	1.00266e-05	0.295598	6.16665e-06
633	10025909319	NM_003965	CCRL2	3.03427	0.000109851	0.000258803	1.22958	0.000235796	0.00035876	1.18891	0.00560242	0.00418949	1.13206	0.220755	0.000527585	0.250158	8.06914e-05
634	10025909327	NM_006140	CSF2RA	3.14504	0.00433105	0.00795883	1.44461	0.00868148	0.0168841	1.31671	0.00968414	0.0129342	1.2685	0.188145	0.00317542	0.188801	0.00306942
635	10025909351	NM_031485	GRWD1	3.60697	0.0009377	0.00174511	1.1736	0.000227571	0.000528395	1.14658	0.000144005	8.2016e-05	1.13837	0.28531	7.42419e-06	0.275911	1.50867e-05
636	10025909364	NM_005779	LHFPL2	4.05654	0.0140941	0.0238454	1.19268	0.0129472	0.0231912	1.16909	0.000209808	0.000311196	1.21728	0.228488	0.000320068	0.236932	0.000187482
637	10025909393	NM_178865	SERINC2	2.93406	1.39475e-05	4.8697e-05	1.32439	6.79493e-06	1.62721e-05	1.26383	2.86102e-06	5.36442e-06	1.24173	0.317666	3.79413e-07	0.319278	3.2868e-07
638	10025909451	NM_022124	CDH23	3.60174	0.00242662	0.00181836	0.808769	0.000182986	0.000282168	0.813133	0.0136722	0.0191194	0.889725	-0.18604	0.00340409	-0.180474	0.00451768
639	10025909521	NM_053013	ENO3	2.70028	0.039045	0.056876	0.942083	0.0123477	0.0248369	0.942847	0.00346637	0.00670201	0.945723	-0.174599	0.0061439	-0.201158	0.00155122
640	10025909546	NM_175873	ANKRD43	2.86331	0.00353462	0.00333136	0.806875	0.01912	0.00840336	0.868099	0.0145806	0.00234199	0.874699	-0.175874	0.00567442	-0.19619	0.0019912
641	10025909577	NM_006917	RXRG	3.05187	0.0190359	0.0433549	0.832516	0.000876963	0.00300336	0.796635	0.000157297	0.000406742	0.804055	-0.220598	0.000491491	-0.217329	0.000598198
642	10025909604	NM_173475	DCUN1D3	3.67926	0.0131389	0.00795883	1.18362	0.0136293	0.00612646	1.14104	0.00739586	0.0029546	1.13365	0.17904	0.00494129	0.180462	0.00460377
643	10025909626	NM_013402	FADS1	3.72611	0.00203419	0.00448358	0.626162	0.0134736	0.0240283	0.728305	0.0113115	0.0190839	0.760625	-0.177613	0.00559243	-0.174319	0.00655631
644	10025909629	NM_153610	CMYA5	3.00388	0.0397319	0.0151592	0.781381	0.0123633	0.00481701	0.775822	0.00787044	0.00234199	0.795074	-0.191761	0.00252433	-0.200925	0.00153652
645	10025909659	NM_004726	REPS2	2.4824	0.0150331	0.00731903	1.15331	0.00640541	0.00278228	1.13904	0.0255355	0.00378418	1.10552	0.187981	0.00301843	0.2094	0.000929375
646	10025909708	NM_005211	CSF1R	4.34311	0.00100571	0.001122	1.34566	0.000106573	5.39422e-05	1.32562	8.04663e-06	8.58307e-06	1.32757	0.279854	1.45254e-05	0.277671	1.7038e-05
647	10025909726	NM_181288	CMTM1	3.11215	0.0567253	0.14508	0.845706	0.00181115	0.00974482	0.802646	0.000351727	0.000440121	0.810345	-0.209973	0.00096718	-0.187795	0.00323337
648	10025909755	NM_015368	PANX1	3.63492	0.0296801	0.0213439	1.14317	0.00360751	0.00169414	1.14822	0.00446498	0.00262743	1.12276	0.22743	0.000313904	0.230004	0.00026692
649	10025909756	NM_181526	MYL9	4.2413	0.0565602	0.0791118	1.1179	0.00461841	0.0067904	1.15889	0.000354767	0.000763655	1.18129	0.210524	0.00142182	0.222405	0.000738878
650	10025909762	NM_147128	ZNRF2	3.48801	0.00231057	0.00493503	1.15112	0.000358999	0.000701785	1.14956	0.00211734	0.00275344	1.11834	0.233129	0.000475251	0.257021	0.000111391
651	10025909780	NM_000433	NCF2	3.64614	8.41022e-05	0.000231802	1.48469	0.000148833	0.000227988	1.36517	0.00776893	0.00131738	1.22944	0.233328	0.000229179	0.244668	0.000109267
652	10025909781	NM_148975	MS4A4A	3.85236	0.000125468	0.000258803	1.35774	0.000302017	0.000257611	1.29307	0.000837922	0.000391245	1.24623	0.205738	0.00114645	0.208026	0.00100599
653	10025909787	NM_173512	SLC38A11	2.62068	0.00704587	0.00333136	0.890621	0.000171423	0.000172615	0.862389	0.000407875	0.000781476	0.880096	-0.210686	0.000884022	-0.24633	9.4542e-05
654	10025909790	NM_174896	C1orf162	3.75654	0.00845182	0.00939059	1.31747	0.00260758	0.00285429	1.28124	0.00357997	0.00452143	1.25736	0.170384	0.00727762	0.194764	0.00210548
655	10025909825	NM_000798	DRD5	2.59062	0.00169098	0.000785828	0.829125	0.0209529	0.00436836	0.883711	0.0388601	0.0142803	0.904003	-0.18603	0.00334066	-0.189257	0.00282321
656	10025909827	NM_170774	RASSF2	3.81291	0.00977284	0.0098145	1.28256	0.00342947	0.00137246	1.25305	0.00840813	0.000941634	1.21021	0.190911	0.00292276	0.227289	0.00037542
657	10025909911	NM_145913	SLC5A8	1.77075	0.00114512	0.0031833	1.28092	0.00410724	0.00689471	1.18869	0.0249215	0.0448316	1.14066	0.22554	0.000363171	0.198717	0.00173518
658	10025910006	NM_001287	CLCN7	4.0068	0.202157	0.188058	1.05509	0.0221133	0.0172469	1.08388	0.0035646	0.00165111	1.09827	0.165833	0.00916575	0.173431	0.00639128
659	10025910025	NM_015397	DCAF12	4.09007	0.00226951	0.00214434	1.20906	0.000101864	3.83258e-05	1.19514	0.000207186	0.000200629	1.15177	0.269411	3.7539e-05	0.24498	0.000187061
660	10025910050	NM_033219	TRIM14	3.44688	0.0261629	0.0124563	1.2151	0.00706434	0.00367349	1.2214	0.00108743	0.000850022	1.266	0.171192	0.00700121	0.193783	0.00221969
661	10025910088	NM_018534	NRP2	3.17723	0.0363035	0.0514698	1.08931	0.00138092	0.00395793	1.11002	0.000643909	0.00162208	1.10485	0.231861	0.000251572	0.222743	0.000443279
662	10025910114	NM_006464	TGOLN2	3.0236	0.00400794	0.00476134	1.14673	0.00145411	0.0021835	1.13691	0.000712574	0.00103253	1.13049	0.197976	0.00184667	0.218523	0.000571793
663	10025910127	NM_005098	MSC	1.99229	0.0840443	0.0704365	1.10545	0.0124165	0.0114033	1.11929	0.000519037	0.000607729	1.16745	0.19941	0.00163395	0.210391	0.000877545
664	10025910128	NM_178424	SOX30	2.40077	0.0452736	0.0682771	1.0607	0.0150768	0.0230625	1.0582	0.000463665	0.00113773	1.0768	0.16525	0.00927241	0.185712	0.0033961
665	10025910166	NM_022343	GLIPR2	4.05281	0.00163084	0.0027743	1.32827	0.000191271	0.000469506	1.3027	0.000379562	0.00113928	1.25143	0.233389	0.00028136	0.213343	0.000925713
666	10025910179	NM_080725	SRXN1	3.40262	0.0521336	0.0489722	1.15429	0.0186483	0.0170435	1.13354	0.00549352	0.00686878	1.13345	0.203796	0.00222535	0.18997	0.004415
667	10025910183	NM_014008	CCDC22	2.96718	0.223128	0.188058	1.05128	0.0372503	0.0557243	1.07362	0.00784266	0.00805318	1.08101	0.172915	0.00644295	0.165657	0.00909825
668	10025910209	NM_001698	AUH	3.37692	0.0161644	0.00864828	0.85465	0.00440908	0.00220525	0.864539	0.00346208	0.00140995	0.885788	-0.165234	0.00957181	-0.200836	0.00157898
669	10025910249	NM_024585	ARMC7	2.60764	0.184972	0.157099	1.05358	0.0115293	0.00931227	1.07844	0.00173551	0.00156754	1.08232	0.195305	0.00204483	0.19687	0.00187827
670	10025910273	NM_033332	CDC14B	2.70828	0.0376995	0.0582826	1.04499	0.0172725	0.0212433	1.04117	0.0053407	0.00691235	1.04535	0.169825	0.00747449	0.179067	0.00476014
671	10025910311	NM_170699	GPBAR1	3.19788	0.000436127	0.000746727	1.19804	0.00319761	0.00140387	1.13992	0.00363308	0.00133681	1.12074	0.214517	0.000689069	0.228777	0.000288436
672	10025910335	NM_004604	STX4	3.62476	0.00612825	0.0176807	1.08485	0.00882858	0.0104273	1.06962	0.00752997	0.00331855	1.063	0.173031	0.00651607	0.167019	0.00867245
673	10025910392	NM_016081	PALLD	4.37794	0.00742674	0.0110478	1.24017	0.0172156	0.0296291	1.1669	0.00268537	0.00363451	1.18031	0.189558	0.0028351	0.189082	0.00290667
674	10025910410	NM_004054	C3AR1	3.56404	0.000334442	0.000339687	1.44164	0.000494421	0.000454545	1.34428	0.00258255	0.00102067	1.26831	0.182777	0.00394758	0.20792	0.0010121
675	10025910442	NM_003006	SELPLG	3.61456	0.00361544	0.00310266	1.27901	0.00261104	0.00114238	1.21579	0.00274718	0.000579655	1.19599	0.214731	0.000715841	0.22017	0.000518003
676	10025910446	NM_003684	MKNK1	4.21966	0.00963479	0.0142303	1.13645	0.00530487	0.00570136	1.1152	0.000237346	0.000171125	1.13029	0.235379	0.000404542	0.242344	0.000267451
677	10025910484	NM_015595		2.85947	0.00346148	0.0101892	0.784311	0.00193262	0.00160605	0.812998	0.00722545	0.00513685	0.853438	-0.204843	0.00123443	-0.188455	0.00300353
678	10025910487	NM_152328	ADSSL1	3.73726	0.00113141	0.000547647	0.677432	0.00176925	0.000541449	0.745799	0.00065887	0.000140607	0.766005	-0.19034	0.00266664	-0.237723	0.000162358
679	10025910492	NM_001856	COL16A1	4.07683	0.00269383	0.00942862	0.849141	0.00259632	0.00576973	0.879329	0.00520277	0.013097	0.905331	-0.20695	0.00149103	-0.188496	0.0038805
680	10025910531	NM_182552	WDR27	3.07968	0.000512779	0.00103021	0.889848	0.000256181	0.000631809	0.907647	0.00254977	0.00260866	0.932651	-0.227505	0.000521339	-0.222382	0.000700524
681	10025910532	NM_080825	C20orf144	4.27834	0.217209	0.294246	0.888534	0.0151439	0.01687	0.836344	0.000667214	0.000542462	0.813707	-0.201658	0.00147527	-0.203532	0.00132881
682	10025910581	NM_024556	FAM118B	3.63324	0.00262004	0.0031833	1.10811	0.0113314	0.0145177	1.07233	0.0230502	0.00620246	1.06268	0.173001	0.00652562	0.187443	0.00316585
683	10025910587	NM_001736	C5AR1	2.38361	0.000119746	0.000398993	1.30973	4.57764e-05	5.59092e-05	1.26688	0.00122935	3.17693e-05	1.21283	0.270843	1.72113e-05	0.28602	5.37943e-06
684	10025910660	NM_001247	ENTPD6	3.67723	0.0176358	0.018699	1.08741	0.0193729	0.0191956	1.06897	0.00239664	0.00282633	1.0843	0.209518	0.000968903	0.195751	0.00208287
685	10025910663	NM_175862	CD86	2.97381	0.00983793	0.0205624	1.2324	0.00288653	0.00811553	1.22273	0.000494778	0.00113773	1.2303	0.2	0.00165329	0.201331	0.00153644
686	10025910667	NM_153226	TMEM20	2.61092	0.00388426	0.00795883	1.32375	0.0189103	0.0481936	1.20119	0.00118995	0.00372291	1.24117	0.199667	0.00161098	0.17899	0.00477855
687	10025910728	NM_139177	SLC39A11	3.84526	0.0208883	0.0312516	1.11758	0.00158745	0.00260919	1.13881	2.80142e-05	0.000103116	1.16819	0.222249	0.00103463	0.25081	0.000202624
688	10025910773	NM_004226	STK17B	2.53738	0.000584066	0.000869751	1.26081	0.00182617	0.00395793	1.17744	0.0222574	0.00702387	1.13135	0.165608	0.00940783	0.207948	0.00105989
689	10025910789	NM_153378	SLC22A12	2.34987	0.0159156	0.036558	1.22521	0.00153255	0.00315952	1.21819	0.000160158	0.000465572	1.23349	0.260149	3.48343e-05	0.250021	7.10529e-05
690	10025910802	NM_172369	C1QC	4.45016	0.00127083	0.00161225	1.33638	0.000975788	0.00129283	1.26895	0.000423014	0.000162423	1.2645	0.204651	0.00168736	0.227978	0.00045231
691	10025910807	NM_022486	SUSD1	3.5763	0.00594747	0.00829715	1.21632	0.00201118	0.00220692	1.20722	0.000984251	0.00190973	1.20104	0.20534	0.00134882	0.208199	0.00114992
692	10025910833	NM_144652	LETM2	3.3976	0.00145519	0.00252897	0.921699	0.00164485	0.00291318	0.93633	0.00136429	0.00146931	0.941457	-0.23058	0.000297723	-0.198094	0.00195887
693	10025910848	NM_014807	C2CD2L	3.69871	0.0938945	0.0662529	1.08083	0.00519919	0.00384671	1.11484	0.000332654	0.000312805	1.13906	0.198453	0.0022396	0.215557	0.000881055
694	10025910876	NM_019043	APBB1IP	4.00534	0.28075	0.363842	1.07868	0.0176391	0.0221367	1.1481	0.00230384	0.00366253	1.16714	0.164284	0.00984777	0.169971	0.00754485
695	10025910885	NM_016174	CERCAM	3.33759	0.0177808	0.027608	1.16442	0.00300354	0.00518709	1.15709	0.000599444	0.00117564	1.16829	0.21002	0.00139101	0.204574	0.00185954
696	10025910892	NM_018108	UBR7	4.13232	0.00152039	0.00153041	0.90131	0.00159639	0.00137246	0.923844	0.00113809	0.00116456	0.932818	-0.181129	0.00488217	-0.176409	0.00614081
697	10025910908	NM_001915	CYB561	3.33794	0.00305688	0.00417024	1.22232	0.000436604	0.000625491	1.18981	0.000272155	0.000275493	1.16623	0.257285	4.59414e-05	0.244459	0.000110804
698	10025910958	NM_001610	ACP2	3.73709	0.00114703	0.00406289	1.17894	0.000362337	0.00104594	1.16064	0.000103831	0.000175953	1.1588	0.22033	0.000745978	0.223885	0.000608232
699	10025910974	NM_033086	FGD3	3.32871	0.00526142	0.00849771	1.25601	0.00524145	0.00310099	1.20251	0.0143678	0.00192255	1.16213	0.19085	0.00287303	0.215964	0.000719037
700	10025910987	NM_018664	BATF3	2.68342	0.00131726	0.000709474	1.22574	0.000354707	0.000573754	1.19034	0.000127792	0.000216007	1.1741	0.224116	0.000385748	0.241981	0.000122543
701	10025911089	NM_138715	MSR1	3.2974	0.00227582	0.00364649	1.42723	0.00250179	0.00436836	1.35302	0.00523543	0.00911838	1.28232	0.165307	0.00953937	0.16911	0.00798763
702	10025911092	NM_017549	EPDR1	4.59221	0.000852168	0.000869751	1.27145	0.000733018	0.00130492	1.22003	0.000854671	0.0015654	1.20744	0.246982	9.35274e-05	0.235993	0.000193174
703	10025911167	NM_024013	IFNA1	2.18737	0.00330609	0.00644565	1.06344	0.00171691	0.0036689	1.05667	0.00157797	0.00440252	1.04835	0.226041	0.00036208	0.204482	0.00128925
704	10025911231	NM_006505	PVR	3.58001	0.137935	0.106963	1.07212	0.0102974	0.00598246	1.09614	0.00333571	0.00245571	1.09839	0.172064	0.00671357	0.176556	0.00539221
705	10025911239	NM_006678	CD300C	3.32838	0.00315666	0.00181836	1.42067	0.00112468	0.000662386	1.34597	0.000978649	0.000253618	1.32218	0.187018	0.00317379	0.242571	0.000117813
706	10025911251	NM_018957	SH3BP1	3.38445	0.0336186	0.0556343	1.14045	0.00983304	0.00986195	1.13899	0.00810772	0.00699008	1.13255	0.20291	0.00360653	0.220634	0.00151865
707	10025911344	NM_012335	MYO1F	3.69334	0.00250184	0.00106311	1.36119	0.000899374	9.44138e-05	1.29465	0.0110521	0.000216007	1.21407	0.203835	0.00127674	0.241536	0.00012623
708	10025911346	NM_145259	ACVR1C	3.64318	0.00017637	0.000244975	0.674325	0.00037694	0.00106811	0.756959	6.21676e-05	0.000253618	0.77002	-0.285652	5.29704e-06	-0.270309	1.72093e-05
709	10025911367	NM_017793	RPP25	3.21041	0.0392586	0.0351844	1.0665	0.00254363	0.00255758	1.07509	0.00120145	0.000634789	1.07441	0.176812	0.00541916	0.174878	0.00595766
710	10025911423	NM_001188	BAK1	2.83048	0.0230419	0.0339506	1.091	0.00788897	0.0129699	1.08089	0.00257587	0.0036664	1.08046	0.174498	0.00628092	0.176964	0.00557162
711	10025911439	NM_178125	TRIM50	2.904	0.000150502	0.000132203	1.24652	1.33514e-05	1.57356e-05	1.21177	1.17421e-05	1.60336e-05	1.18905	0.247411	8.49779e-05	0.252932	5.80661e-05
712	10025911484	NM_005700	DPP3	3.51136	0.00183129	0.00731903	1.18194	7.93934e-05	0.000387728	1.18476	6.3777e-06	4.15444e-05	1.19407	0.283994	7.85862e-06	0.27099	2.07975e-05
713	10025911530	NM_152615	PARP15	1.89404	0.000875652	0.00101137	1.24228	0.00791264	0.00470114	1.16327	0.016298	0.00734997	1.12633	0.177077	0.00534876	0.195901	0.00202257
714	10025911596	NM_153244	C10orf111	2.51587	0.000493348	0.000455618	1.24328	0.00684899	0.00276583	1.17086	0.00135279	0.000308454	1.16629	0.256965	4.53246e-05	0.263678	2.80273e-05
715	10025911765	NM_032211	LOXL4	3.14142	0.00133997	0.00304121	1.18151	0.000233054	0.000380754	1.16427	1.72257e-05	2.65241e-05	1.16251	0.242394	0.000119218	0.241813	0.000123926
716	10025911769	NM_181555	CMTM3	4.02897	2.98023e-06	5.36442e-06	1.32231	1.96695e-06	3.75509e-06	1.24834	3.9041e-05	4.76241e-05	1.18773	0.322589	5.4167e-07	0.286287	9.84926e-06
717	10025911774	NM_004106	FCER1G	4.24974	0.00175911	0.001652	1.2893	0.000874996	0.00132978	1.24717	0.00133205	0.000406742	1.22616	0.187366	0.0031169	0.22981	0.00027021
718	10025911800	NM_001295	CCR1	3.69343	7.58767e-05	0.000244975	1.51074	0.00153971	0.00144231	1.33413	0.00259084	0.00077498	1.28709	0.19564	0.00200808	0.219141	0.000522685
719	10025911867	NM_024656	GLT25D1	4.29293	0.000859797	0.0031833	1.18038	2.34246e-05	0.00010401	1.17955	2.32458e-06	3.09944e-06	1.19023	0.250417	6.91361e-05	0.24919	7.52323e-05
720	10025911891	NM_178562	TSPAN33	2.7264	0.020107	0.0293791	1.2082	0.0031693	0.00176257	1.21439	0.000428379	9.67979e-05	1.23148	0.208198	0.00102021	0.236431	0.000182136
721	10025911894	NM_173575	STK32C	3.11711	0.00254124	0.00304121	1.22177	0.000766456	0.000557363	1.18941	0.000936568	0.000348032	1.16405	0.183269	0.00384982	0.188867	0.00288171
722	10025911906	NM_172246	CSF2RA	2.45388	0.00536734	0.00519645	1.3695	0.00564098	0.00830489	1.27108	0.00928474	0.0127348	1.22017	0.197635	0.00180132	0.197259	0.00183878
723	10025912008	NM_170726	ALDH4A1	4.11032	0.00237382	0.001652	1.458	0.00322044	0.00224209	1.32657	0.000605285	0.000383496	1.34995	0.247821	9.44961e-05	0.229602	0.000307359
724	10025912017	NM_000631	NCF4	3.41951	9.29832e-06	5.6982e-05	1.37393	3.31998e-05	0.000115097	1.27716	0.000412166	0.000340164	1.21685	0.256879	6.0833e-05	0.262303	4.18047e-05
725	10025912021	NM_152557	ZNF746	3.95427	0.133205	0.166631	1.07676	0.0246294	0.0304894	1.08768	0.00462747	0.00399578	1.09842	0.186986	0.00479725	0.183545	0.00564828
726	10025912038	NM_017565	FAM20A	3.4325	0.0271403	0.024734	1.15374	0.00879598	0.00556844	1.14389	0.00249547	0.00131321	1.14571	0.164342	0.00997365	0.180543	0.00458506
727	10025912047	NM_000573	CR1	2.51301	0.000425577	0.000709474	1.49709	0.000257671	0.000662386	1.43041	9.9957e-05	0.000229478	1.38863	0.259534	3.77668e-05	0.239957	0.000144653
728	10025912054	NM_016598	ZDHHC3	4.27136	0.00640392	0.00820339	1.12591	0.0030486	0.00309324	1.11512	0.000373185	0.000732601	1.12906	0.268467	4.5088e-05	0.250458	0.000146674
729	10025912090	NM_021149	COTL1	4.82721	0.0109755	0.0110478	1.27134	0.00748533	0.00642401	1.21459	0.00262773	0.00203502	1.21731	0.204777	0.00121067	0.212821	0.0007615
730	10025912124	NM_139282	RHOXF1	2.75917	0.00337589	0.00417024	1.2823	0.0203227	0.0356761	1.16706	0.0371065	0.053874	1.13118	0.194879	0.00209252	0.171725	0.00682405
731	10025912132	NM_153649	TPM3	4.7919	0.00763619	0.00612551	1.12204	0.00588822	0.00459742	1.09754	0.00226426	0.00219166	1.0986	0.193675	0.00286898	0.240007	0.000203961
732	10025912141	NM_178145	RASSF4	3.75061	0.00598371	0.00829715	1.23717	0.0154538	0.0287791	1.16131	0.00174081	0.00601208	1.18548	0.220757	0.000473913	0.173765	0.00618264
733	10025912165	NM_001061	TBXAS1	3.84889	0.000116408	0.000122845	1.37274	1.22786e-05	9.29832e-06	1.31792	4.18425e-05	1.23978e-05	1.26674	0.265228	3.15147e-05	0.291588	4.35057e-06
734	10025912183	NM_025201	PLEKHO2	4.2025	0.0162793	0.0176807	1.18125	0.000317037	0.000308871	1.21057	0.000251889	0.000361919	1.19453	0.246594	8.98382e-05	0.223278	0.000406193
735	10025912201	NM_000405	GM2A	3.85468	0.00561035	0.00745112	1.16244	0.00157309	0.000501394	1.14505	4.39882e-05	1.19805e-05	1.16179	0.22952	0.000378256	0.2911	5.43937e-06
736	10025912213	NM_032501	ACSS1	3.74273	0.420868	0.459831	1.04531	0.094332	0.080257	1.07573	0.00768155	0.005647	1.10421	0.172854	0.00657188	0.182384	0.00410311
737	10025912241	NM_153619	SEMA6D	3.92017	0.00864101	0.00939059	0.784736	0.0189499	0.0151583	0.824918	0.00970125	0.00842685	0.839917	-0.179015	0.00485914	-0.164589	0.00971017
738	10025912258	NM_178012	TUBB2B	3.54352	4.76837e-07	2.32458e-06	2.4629	5.36442e-08	5.96046e-08	2.19327	5.96046e-08	2.98023e-07	1.94769	0.435302	8.51918e-13	0.418322	7.69354e-12
739	10025912342	NM_003288	TPD52L2	4.74945	0.0132843	0.0205624	1.13522	0.00108606	0.00238413	1.14002	0.000849605	0.00180292	1.11957	0.251473	6.65206e-05	0.228897	0.000294606
740	10025912352	NM_002074	GNB1	4.70962	0.00128681	0.00264907	1.12483	0.000437319	0.00152218	1.10828	6.93798e-05	0.000179946	1.10136	0.237987	0.000159577	0.219772	0.000503111
741	10025912366	NM_001708	OPN1SW	2.54443	0.00267786	0.00106311	1.08414	0.0114746	0.00860196	1.05369	0.00748122	0.00495785	1.04757	0.217691	0.000585392	0.170228	0.00745341
742	10025912444	NM_020041	SLC2A9	2.80816	9.04202e-05	0.000219345	1.35993	0.000407279	0.00196266	1.2437	0.00463688	0.0069173	1.18371	0.194818	0.00218993	0.197486	0.00189648
743	10025912454	NM_015345	DAAM2	3.97971	0.152526	0.103934	1.12138	0.0306424	0.0199621	1.13844	0.00299907	0.00276339	1.1717	0.204321	0.0012713	0.188987	0.00292117
744	10025912470	NM_138431	MFSD3	2.89169	0.00159138	0.00469065	1.15502	0.00109655	0.0061025	1.12275	0.000881851	0.00227183	1.11416	0.2151	0.000756153	0.207543	0.00116494
745	10025912496	NM_145659	IL27	4.43054	0.276609	0.494726	0.889727	0.011938	0.0136015	0.812025	0.00138789	0.000574231	0.802483	-0.195062	0.00207194	-0.198856	0.00168463
746	10025912553	NM_018645	HES6	2.96052	0.0059582	0.00731903	1.17662	0.0227237	0.0172469	1.1186	0.0143522	0.00968587	1.11655	0.164524	0.00989025	0.173896	0.00635645
747	10025912607	NM_003872	NRP2	2.42181	0.000864148	0.000662625	1.1305	0.00418115	0.00376302	1.08894	0.00808042	0.0124643	1.07501	0.250065	7.32956e-05	0.209794	0.000930807
748	10025912629	NM_018231	SLC38A7	3.55479	0.00178361	0.00264907	1.12719	0.00167769	0.00220525	1.1028	8.15988e-05	9.05395e-05	1.11032	0.238807	0.000151208	0.198686	0.00170046
749	10025912650	NM_021978	ST14	3.62314	0.00125653	0.00333136	1.46911	0.000256538	0.000411808	1.42466	0.000134706	0.000227928	1.37571	0.249818	7.45479e-05	0.255477	5.03342e-05
750	10025912661	NM_152524	SGOL2	2.49229	0.0378904	0.0463582	0.83696	0.00488543	0.00722545	0.82177	0.006073	0.00805318	0.85134	-0.195173	0.00205951	-0.166865	0.00859815
751	10025912687	NM_173558	FGD2	3.52313	0.000351191	0.00077641	1.37337	8.61287e-05	0.000189841	1.30097	4.1008e-05	1.69277e-05	1.28745	0.256673	6.63015e-05	0.260251	5.19271e-05
752	10025912690	NM_024778	LONRF3	2.60739	0.0770916	0.0275739	1.08035	0.00485712	0.00140387	1.10411	0.00271428	0.000415027	1.10055	0.170546	0.00734111	0.229077	0.000291291
753	10025912693	NM_032166	ATRIP	4.39401	0.145504	0.223302	0.853851	0.00358343	0.00947541	0.777041	0.000278831	0.000190675	0.770451	-0.220316	0.0006027	-0.218583	0.000667141
754	10025912701	NM_016113	TRPV2	3.74956	0.0512015	0.029757	1.11893	0.0138433	0.00694019	1.12051	0.000664353	0.000456154	1.14436	0.201681	0.00184632	0.247206	0.000124439
755	10025912741	NM_000890	KCNJ5	2.73367	0.00432485	0.0049746	1.27735	0.000525892	0.000701308	1.27673	7.88569e-05	0.000114202	1.26722	0.229417	0.000285132	0.178353	0.00502175
756	10025912773	NM_139265	EHD4	3.80716	0.0518222	0.0440208	1.1503	0.0264233	0.0292658	1.13443	0.00207436	0.00310671	1.16501	0.225178	0.000746398	0.203399	0.00237822
757	10025912819	NM_000047	ARSE	3.72582	0.00235575	0.00978267	0.889676	0.000308633	0.000701308	0.8971	0.00183535	0.00326419	0.923086	-0.206655	0.00108811	-0.217267	0.000585019
758	10025912892	NM_005084	PLA2G7	3.16489	0.000423372	0.000258803	1.72421	0.000112712	5.06043e-05	1.67292	9.95398e-06	5.36442e-06	1.63501	0.269792	2.01453e-05	0.314178	5.74872e-07
759	10025912899	NM_001949	E2F3	3.10847	0.00367385	0.00617611	1.32681	0.00354916	0.00757039	1.25439	0.00303823	0.00601208	1.21569	0.230343	0.000261241	0.200252	0.00155963
760	10025912912	NM_144780	DEGS1	4.19387	0.000255823	0.000339687	1.19496	0.000859261	0.00178671	1.13161	0.000455022	0.000746727	1.12639	0.265997	2.27715e-05	0.256321	4.57639e-05
761	10025912968	NM_173653	SLC9A9	4.00055	0.0112958	0.0176807	1.14825	0.00371623	0.00584143	1.14295	8.88705e-05	0.000199199	1.17139	0.210857	0.000854108	0.232895	0.000221992
762	10025913103	NM_005892	FMNL1	3.09637	0.0213297	0.0250206	1.15041	0.0235687	0.0128418	1.11262	0.00711417	0.00129342	1.11913	0.189089	0.00376776	0.19948	0.00221814
763	10025913110	NM_033549	TRIM41	3.6124	0.0151286	0.0110478	1.11338	0.0063175	0.00974482	1.10155	0.00180984	0.00390947	1.1025	0.200239	0.00156076	0.172824	0.00647152
764	10025913115	NM_139249	MS4A6E	2.39825	0.00101668	0.000148118	1.45102	0.00340599	0.000808001	1.30368	0.00209647	0.000693083	1.26955	0.212956	0.000755487	0.243806	0.000108459
765	10025913139	NM_012320	PLA2G15	3.92711	1.09076e-05	3.69549e-05	1.2903	1.84774e-06	1.78814e-06	1.24885	1.37091e-06	1.19209e-07	1.23561	0.309483	1.06228e-06	0.324144	2.99305e-07
766	10025913152	NM_016573	GMIP	3.21958	0.0045532	0.00644565	1.18001	0.00167745	0.00148177	1.15128	0.0192917	0.00096637	1.11131	0.186947	0.0031855	0.209357	0.000931687
767	10025913186	NM_138821	PAM	4.25916	0.0229859	0.0194945	1.12199	0.0135111	0.00849378	1.11535	0.000695825	0.000732839	1.13279	0.18906	0.00384959	0.19212	0.00330445
768	10025913187	NM_031885	BBS2	4.06562	0.00783515	0.019074	0.886528	0.00381619	0.00481701	0.896149	0.0152432	0.0144846	0.926477	-0.191503	0.0025073	-0.173195	0.0063563
769	10025913210	NM_004504	AGFG1	3.81884	0.000101745	0.000646234	1.26396	0.000803292	0.00141209	1.18795	0.000101149	0.000245094	1.17896	0.268963	2.40981e-05	0.267898	2.60256e-05
770	10025913242	NM_001559	IL12RB2	2.41845	0.00249636	0.00173336	1.12371	0.00224161	0.00173986	1.10761	0.00058198	0.000563443	1.10206	0.24541	9.7347e-05	0.226465	0.00033341
771	10025913250	NM_000230	LEP	5.20242	0.0030483	0.00435942	1.64855	0.000314295	0.00067836	1.62346	0.000230014	0.000460863	1.56305	0.275997	1.43808e-05	0.244297	0.00013186
772	10025913274	NM_170664	OTOA	2.57217	0.000726104	0.00181836	1.20625	0.000402629	0.00035876	1.17773	0.000188172	0.000140607	1.16013	0.260501	3.795e-05	0.24623	0.000101705
773	10025913356	NM_152594	SPRED1	3.63532	0.0169224	0.0213439	1.14126	0.00546962	0.0124595	1.1487	0.00131947	0.0016523	1.14431	0.172441	0.00659255	0.191802	0.00246773
774	10025913374	NM_015068	PEG10	3.46821	0.00283331	0.00644565	0.870891	0.00620186	0.0138634	0.905838	0.00183374	0.00537193	0.914071	-0.224098	0.000396963	-0.208409	0.00100795
775	10025913622	BC038559		3.20558	0.000800014	0.000420809	1.2002	0.000809908	0.000427604	1.15419	0.00405783	0.000859499	1.10983	0.192837	0.00253681	0.199474	0.00177847
776	10025913661	HSS00183867		2.39534	0.052745	0.0448353	1.0739	0.00113863	0.000742316	1.11281	0.00183403	0.0032106	1.09153	0.177066	0.00525812	0.209149	0.00094296
777	10025913782	HSS00146647		3.34501	0.0010429	0.000672817	1.27017	0.000433922	0.000207961	1.22752	0.000888824	0.00023514	1.20062	0.201806	0.0018341	0.242277	0.000171062
778	10025913879	hCT2301514		3.35444	0.021299	0.0221511	1.12457	0.00283205	0.00505662	1.12751	6.34789e-05	0.000195205	1.16314	0.211017	0.000846179	0.200497	0.00153864
779	10025913966	HSS00173586		2.17556	0.00136828	0.000148118	0.883391	0.00141752	0.000142992	0.887292	0.00440431	0.00122255	0.911996	-0.214666	0.000683034	-0.21691	0.000597672
780	10025914048	BC039471		2.47429	0.00139713	0.00101137	0.784412	0.021051	0.0165146	0.873506	0.00936061	0.0083006	0.883273	-0.188531	0.00293279	-0.190183	0.00268878
781	10025914245	XM_065453		4.67356	0.00488627	0.00219339	0.684699	0.00816512	0.00484335	0.770472	0.0200322	0.0194789	0.828751	-0.179321	0.00573458	-0.187409	0.00385989
782	10025914254	BC034319		2.48392	0.000713706	0.000321805	1.20681	0.000504673	0.000201583	1.19004	0.00413626	0.00186664	1.13569	0.212908	0.000757623	0.230294	0.00026206
783	10025914579	hCT1651603.2		2.51771	0.00234914	0.00190711	1.11073	0.00249183	0.00238413	1.08707	0.00153071	0.00249767	1.08037	0.177004	0.00527429	0.202392	0.00138448
784	10025914596	HSS00303053		2.55272	0.00927091	0.00939059	0.909668	0.00108403	0.00203878	0.909958	0.000719666	0.00174117	0.923837	-0.193333	0.00232179	-0.226789	0.000336091
785	10025914677	AK057119		2.84967	0.000492036	0.00123346	0.789183	0.00163037	0.00230223	0.839727	0.0411018	0.0283177	0.901002	-0.215102	0.000682771	-0.164691	0.00966414
786	10025914723	BC036832		2.42903	0.00940096	0.00731903	1.10589	0.00214606	0.00292796	1.10379	0.00207537	0.00241441	1.095	0.224058	0.000387133	0.21156	0.000819833
787	10025914851	HSS00257867		2.24507	0.0402272	0.0661726	1.07243	0.00509107	0.00910252	1.0746	0.00845045	0.00620246	1.05974	0.222115	0.000448221	0.211264	0.000854902
788	10025914870	hCT1970937.1		3.81979	0.00845581	0.00333136	1.26752	0.00389707	0.000681579	1.23351	0.00346613	9.05395e-05	1.22181	0.20631	0.00116318	0.261934	3.30059e-05
789	10025915068	HSS00178406		2.46054	0.0187582	0.0213439	1.07568	0.0262668	0.0127367	1.05725	0.00212801	0.00200027	1.07295	0.193104	0.00230206	0.233875	0.000208448
790	10025915215	HSS00041395		2.35942	0.00225276	0.00150472	1.07678	0.000324547	0.000268936	1.07022	0.00168037	0.00135648	1.05512	0.196051	0.00200619	0.226503	0.000342116
791	10025915381	AK025148		1.79542	0.00906926	0.00505972	0.652936	0.0103775	0.00675362	0.729546	0.00712365	0.00355375	0.739049	-0.205277	0.0016317	-0.177573	0.00657587
792	10025915509	HSS00051878		2.46511	0.0130269	0.0205624	0.881632	0.00184751	0.00405717	0.882618	0.00271142	0.00601208	0.901167	-0.189543	0.00278106	-0.179234	0.00472042
793	10025915601	AL080190		2.69812	0.0176216	0.0145806	0.80219	0.00327533	0.00292796	0.801876	0.00117332	0.00146079	0.807887	-0.222204	0.000445776	-0.216119	0.000642877
794	10025915817	AF086191		3.38846	0.00948793	0.012359	1.16781	0.0142404	0.0114092	1.12949	0.00237727	0.00151014	1.13452	0.1979	0.00215946	0.203552	0.00159492
795	10025915867	AL359567	CADM1	2.60232	0.000383198	0.00142866	0.779012	0.00574845	0.0148349	0.851734	0.00198758	0.00354439	0.855509	-0.209694	0.000913726	-0.184901	0.00354104
796	10025916116	HSS00296199		3.18636	0.00294823	0.0049746	1.13748	0.000472724	0.00162494	1.14201	0.000230312	0.000566006	1.14627	0.221121	0.000489121	0.222249	0.000456784
797	10025916186	HSS00001981		2.56126	0.00676054	0.024734	1.09152	0.00149036	0.00712419	1.08927	0.000739992	0.00279421	1.07781	0.214836	0.000729762	0.165652	0.00953608
798	10025916437	hCT1764595.2		3.5338	0.000879169	0.000906527	1.3034	0.000761092	0.00112945	1.22953	0.0025391	0.00284076	1.1803	0.219321	0.000656133	0.197243	0.00223577
799	10025916642	BC039671		2.45557	0.00556785	0.00199992	0.909721	0.00293553	0.00112867	0.928152	0.00532806	0.00315785	0.944261	-0.206101	0.00114966	-0.226722	0.000337492
800	10025917155	AK092698		2.04268	0.00235659	0.00219798	0.808904	0.00288367	0.00226349	0.826084	0.00194281	0.00143516	0.83702	-0.216294	0.000620037	-0.256819	4.41767e-05
801	10025917908	XM_209277		2.26458	0.000928938	0.000709474	0.828878	0.00151747	0.00034827	0.857935	0.00110084	0.00024724	0.878007	-0.18463	0.00365978	-0.250565	7.08204e-05
802	10025917950	AK091354	NRP1	3.16548	0.00983733	0.0140216	1.18222	0.00332356	0.00627369	1.16273	0.00420004	0.00950021	1.1398	0.234738	0.000203196	0.203443	0.00133549
803	10025917972	AK021689		2.13236	0.00209528	0.0049746	0.784214	0.00248438	0.00757039	0.823821	0.0312817	0.0466688	0.883611	-0.168006	0.00827964	-0.163986	0.00998413
804	10025917993	BC030101	ACVR1C	4.09869	0.00442755	0.010396	0.700337	0.00148958	0.00313288	0.746602	0.000177324	0.000341535	0.744601	-0.26036	4.9667e-05	-0.258024	5.83234e-05
805	10025918000	BC010527		3.48005	3.67761e-05	0.000172913	1.5754	0.0022139	0.00359189	1.34876	0.0024761	0.00302941	1.31975	0.233856	0.000299077	0.21487	0.000915977
806	10025918008	AK090441	ZC3H12D	3.02219	0.0293968	0.0222856	1.21195	0.00278646	0.00412738	1.23638	0.000151277	0.000320792	1.25517	0.195806	0.00268318	0.238993	0.000231458
807	10025918768	hCT1642974.2		2.55078	0.0117084	0.0183658	0.879999	0.00165343	0.00386095	0.881667	0.000552773	0.000874221	0.889281	-0.203436	0.00133603	-0.169478	0.00772349
808	10025918886	BC039516		3.08792	0.00753838	0.0106108	0.848374	0.0159199	0.0235379	0.886055	0.00448442	0.00649828	0.888631	-0.205744	0.00117317	-0.195161	0.00210497
809	10025919025	Y13871		2.63737	0.00388795	0.00192451	0.835601	0.000386119	0.000177979	0.837483	0.00244403	0.00149614	0.874063	-0.207207	0.00110553	-0.172754	0.00671586
810	10025919671	U92992		2.0877	0.00491327	0.00490636	0.831682	0.000291944	0.000785708	0.834955	0.00101388	0.00289178	0.872605	-0.234296	0.000222015	-0.222626	0.000458774
811	10025919929	hCT1786307.2		4.25368	0.0488216	0.0229847	0.908752	0.0267239	0.0158237	0.922397	0.00177515	0.0010584	0.908219	-0.19706	0.00185889	-0.213869	0.000715961
812	10025920039	hCT2299587		2.08483	0.00908518	0.00617611	1.12013	0.00627232	0.00238413	1.11687	0.0097726	0.00884599	1.09241	0.21374	0.000739813	0.177454	0.00525021
813	10025920818	hCT1641737.3	FTHL5	5.49037	0.00138468	0.0031833	1.38683	8.33273e-05	0.000142992	1.37978	0.000214696	0.000422776	1.3069	0.244888	0.000100841	0.248639	7.81316e-05
814	10025920986	AK093219		2.21937	0.0259078	0.0136293	1.05736	0.00513464	0.00123459	1.05319	0.0436919	0.0161546	1.03806	0.173868	0.00636518	0.174265	0.00624393
815	10025921376	HSS00252834	CMKLR1	3.87059	0.00260043	0.00978267	1.24872	0.000873923	0.00331336	1.21	8.58307e-05	0.000262678	1.21946	0.233647	0.000260793	0.212351	0.000931688
816	10025921402	XM_210319		2.65588	0.0222178	0.0238454	0.86627	0.00241786	0.00278228	0.860409	0.00116545	0.00154018	0.878339	-0.207434	0.00104072	-0.201747	0.00143531
817	10025922231	HSS00029681		3.13421	0.000670373	0.000961959	1.48749	0.00226635	0.00757039	1.31304	0.00468475	0.0373917	1.24014	0.255097	4.98926e-05	0.181145	0.00428816
818	10025922383	AF307448	CECR4	2.90876	0.000662208	0.00111729	0.815118	0.00288606	0.00257617	0.864151	0.0225683	0.0106549	0.907011	-0.166373	0.00907981	-0.178717	0.00502095
819	10025922593	HSS00385550		3.1205	0.127148	0.165522	1.12676	0.0800927	0.0676566	1.11381	0.00683421	0.00817603	1.15372	0.181667	0.00417661	0.183601	0.0037851
820	10025922936	hCT1951519.1		3.29862	0.0114051	0.0126826	0.794232	0.00647271	0.00510114	0.814068	0.0015828	0.00100672	0.811871	-0.218538	0.000763061	-0.228187	0.000434098
821	10025923077	HSS00202066	CR1L	2.48919	0.00411189	0.0170181	1.08733	0.00349557	0.00901187	1.07355	0.00496262	0.00702387	1.07277	0.16988	0.00770262	0.18536	0.00359367
822	10025923114	BC012900		3.62632	0.000392318	0.00026238	0.638876	0.00297159	0.00147498	0.723046	0.00445515	0.00221473	0.769308	-0.218418	0.000606404	-0.23231	0.000259418
823	10025923131	HSS00046440		2.90824	0.000225723	0.00016588	1.25472	2.83122e-05	3.26037e-05	1.21937	3.15905e-06	5.90086e-06	1.21404	0.286607	4.91085e-06	0.307236	8.94044e-07
824	10025923156	AK092411		2.22852	0.0334342	0.0378396	0.901664	0.00173819	0.00122541	0.888318	0.000910103	0.000667632	0.895182	-0.204256	0.00124681	-0.191939	0.00244975
825	10025923166	HSS00388177		3.62589	0.0157828	0.0100787	1.13579	0.0111589	0.00512385	1.12451	0.000905752	0.000342071	1.13928	0.184615	0.00469541	0.195474	0.00272925
826	10025923481	AF085837		2.32269	3.25441e-05	4.06504e-05	0.805921	0.000735521	0.00129414	0.86696	0.00349605	0.00545842	0.885603	-0.217539	0.00059076	-0.214887	0.000691512
827	10025923590	AK054983		3.36392	0.00172698	0.00333136	1.20356	0.00162685	0.00148177	1.16005	0.00785124	0.0125525	1.11343	0.19859	0.00170944	0.19473	0.00210937
828	10025923625	HSS00169128		2.4675	0.00348997	0.00763297	1.06531	0.00128502	0.00426233	1.05967	0.000585258	0.0022943	1.05266	0.220142	0.000491941	0.20249	0.00137691
829	10025923715	AF086214		2.81808	0.00525618	0.00701678	1.26389	0.00229847	0.00214845	1.23615	0.00275218	0.00254023	1.20095	0.17351	0.00625982	0.16894	0.00779584
830	10025923870	AK092969	C1orf132	2.99475	0.00352609	0.00158125	1.09969	0.00234377	0.000986755	1.08045	0.00066781	0.000135899	1.079	0.182861	0.00448198	0.255412	6.26096e-05
831	10025924027	HSS00049328		3.01744	0.00051266	0.000304818	0.839638	0.00490588	0.00315952	0.89221	0.0471239	0.0140784	0.929049	-0.182032	0.00409999	-0.185689	0.00340008
832	10025924223	AK095583		4.02065	0.0930548	0.0688452	1.12043	0.00577521	0.00409448	1.1539	0.000439286	0.000393748	1.16807	0.209057	0.00112253	0.224128	0.000467601
833	10025924391	AF330042		2.40486	0.0525494	0.0213439	0.870809	0.0501018	0.0101953	0.892406	0.00519848	0.00207037	0.864601	-0.170014	0.00740755	-0.180171	0.00450381
834	10025924488	HSS00016210		3.19815	0.00347883	0.00282437	0.915841	0.0208323	0.0269914	0.947421	0.0675997	0.0543682	0.96372	-0.182756	0.00418006	-0.175848	0.00588308
835	10025924514	HSS00230232	POLR1A	2.88708	0.277033	0.378908	1.06203	0.0424161	0.0676566	1.10059	0.00232357	0.0043084	1.14181	0.165697	0.00922382	0.173918	0.00624239
836	10025924775	hCT1645818.3		2.96155	0.0768521	0.266646	0.750719	0.00289738	0.0191956	0.682392	0.000761926	0.000781476	0.696804	-0.194164	0.00226786	-0.180479	0.00459973
837	10025924960	HSS00185878		1.77535	0.000622928	0.000869751	1.23049	0.000377178	0.000318348	1.1927	0.0334055	0.00590265	1.10535	0.202954	0.00150364	0.181492	0.00462152
838	10025925343	HSS00209863	FRMD4B	2.80673	0.00102395	0.00173336	1.28451	0.000133276	0.00034827	1.25356	0.00207162	0.00217968	1.18485	0.220517	0.000480877	0.21993	0.000498304
839	10025925490	AK093901		2.84822	0.00892788	0.0183658	1.09317	0.00171459	0.00308055	1.09031	0.000112414	0.000328183	1.09947	0.23292	0.000221646	0.220329	0.000486401
840	10025925737	hCT1971397		2.95707	0.00224918	0.00381404	0.824121	0.0089581	0.0158237	0.875803	0.000881851	0.00249767	0.866874	-0.182094	0.00408712	-0.193398	0.00226604
841	10025925750	XM_212523		2.4831	0.0377192	0.0641219	1.03884	0.0034675	0.00300336	1.04512	0.000164092	0.000269294	1.05147	0.18003	0.00453586	0.204495	0.00123007
842	10025925799	hCT1970535.1		2.80158	0.158767	0.106963	1.07587	0.040683	0.0323835	1.09071	0.00290263	0.00241441	1.11388	0.177266	0.00520631	0.193711	0.0022283
843	10025925818	hCT31672.3		4.51917	0.0120582	0.018622	1.09892	0.00120205	0.00271446	1.11145	0.000730038	0.00155407	1.09854	0.213918	0.00134357	0.211991	0.00148831
844	10025925921	hCT1952587.1	SLC26A5	2.51473	0.0219228	0.0124563	0.937745	0.00535995	0.00386095	0.945109	0.0153364	0.0117537	0.95947	-0.179114	0.00483537	-0.177031	0.00536087
845	10025925940	AK056845		3.23091	0.00261742	0.00509608	0.787563	0.000683606	0.00118279	0.809812	0.00564295	0.00760615	0.854777	-0.189625	0.00345357	-0.199945	0.00202509
846	10025925996	hCT1810038.1	ZNF630	3.21865	0.00398403	0.00729036	0.925808	0.00137216	0.00247091	0.937105	0.0132668	0.0149709	0.955701	-0.180006	0.00506549	-0.191633	0.00281529
847	10025926011	hCT1648436.3		3.28417	0.0758436	0.0749229	1.07116	0.0123336	0.0142063	1.08041	0.00565344	0.00582695	1.08063	0.177792	0.00507218	0.185027	0.00351804
848	10025926145	AF264623		2.90979	0.00607681	0.00264907	0.897322	0.00134546	0.000541449	0.911575	0.000556409	0.000224888	0.921598	-0.242572	0.000117805	-0.230506	0.000258549
849	10025926434	hCT1644152.2		2.62227	0.000119448	0.000293493	1.07089	0.000735343	0.000660658	1.05414	0.000627697	0.000544667	1.049	0.235549	0.000204911	0.203743	0.00137496
850	10025926559	HSS00169162		3.01038	0.00051856	0.00233501	1.37407	0.000616491	0.00196266	1.29554	0.000508666	0.000555217	1.25586	0.235766	0.000208327	0.219833	0.000557466
851	10025927170	HSS00085685	PNMAL2	2.80097	0.0197663	0.0229847	1.10918	0.00192422	0.00098294	1.1241	2.64645e-05	2.80738e-05	1.15001	0.257856	4.41264e-05	0.27996	8.62969e-06
852	10025927205	U29111		2.54862	0.00149739	0.0023036	0.899576	0.00384957	0.0099678	0.926695	0.0043723	0.013488	0.938965	-0.187063	0.00316642	-0.179922	0.00456063
853	10025927365	hCT1658452.1		2.24973	0.00683254	0.00566721	1.07726	0.0165431	0.0245144	1.05527	0.0255156	0.035112	1.0506	0.173807	0.00616999	0.172876	0.00645508
854	10025927564	HSS00001910	SLC28A2	2.57706	0.0145957	0.0134815	0.903972	0.0151873	0.0165146	0.902952	0.00392628	0.00513685	0.905512	-0.166508	0.00874329	-0.2012	0.0014797
855	10025927567	HSS00180849		2.91532	0.00847435	0.01296	0.841759	0.0148977	0.0104273	0.864344	0.00807315	0.00497627	0.870341	-0.197657	0.00179918	-0.179066	0.00476024
856	10025927970	AK024914		2.51575	0.0301317	0.062124	0.856063	0.0691937	0.0793795	0.893992	0.00554949	0.00545842	0.862558	-0.175578	0.00585816	-0.172269	0.00687416
857	10025928323	hCT13145.3		2.6842	0.00281692	0.0049746	1.20216	0.0211111	0.0230625	1.11931	0.0180914	0.0140784	1.10507	0.202058	0.00144281	0.182985	0.00397991
858	10025928809	HSS00143961		3.21302	6.11544e-05	0.000183702	1.38846	7.30157e-05	0.000172317	1.30163	1.32322e-05	2.02656e-05	1.30028	0.250471	8.17473e-05	0.247821	9.77219e-05
859	10025929087	hCT1642032.2	P2RX6P	2.35863	0.00949234	0.019074	1.16832	0.0233345	0.0158237	1.12266	0.00343758	0.00245571	1.13631	0.206216	0.0011157	0.215784	0.000639174
860	10025929204	XM_172410		2.68774	0.00249451	0.0039885	1.22693	0.00649154	0.00722545	1.15801	0.0106842	0.0238057	1.12876	0.184064	0.00376727	0.17307	0.00650395
861	10025929310	HSS00104805		3.15134	0.00176567	0.00181836	0.841345	0.000768244	0.000879109	0.86172	0.00499815	0.0043084	0.888466	-0.214957	0.000671349	-0.19859	0.00170942
862	10025929313	AK092435		2.57224	0.00593311	0.0023036	1.45499	0.0221489	0.00556844	1.27921	0.0113686	0.00193238	1.24824	0.174265	0.00603371	0.203592	0.00129435
863	10025929799	HSS00085187		3.09466	0.042028	0.0433549	0.950219	0.00377929	0.00395793	0.943198	0.010074	0.0157658	0.956595	-0.171952	0.00674994	-0.181532	0.00420525
864	10025930158	AL133438		4.76885	0.0117786	0.0183658	1.1228	0.0064891	0.00237966	1.11768	0.000481129	0.000285447	1.13365	0.195662	0.00227896	0.215214	0.000770595
865	10025930203	AK054989		3.33154	0.0812514	0.0517668	1.05671	0.0120929	0.00981695	1.07336	0.00096935	0.00150531	1.09015	0.187605	0.00360294	0.184647	0.00417962
866	10025930224	AK098473		3.53893	0.00887418	0.0124563	1.37897	0.0673946	0.0642107	1.20647	0.00701451	0.0096426	1.26858	0.203159	0.00138828	0.168336	0.00828386
867	10025930432	BC038299		2.5165	0.000178337	0.00117403	1.20543	0.00109237	0.00285429	1.15114	0.0032444	0.00747347	1.11225	0.249515	7.61168e-05	0.199541	0.00165839
868	10025930675	HSS00168882		3.71606	0.0224038	0.00536489	0.852618	0.00676352	0.00123459	0.857788	0.10296	0.0268567	0.91992	-0.180714	0.00446359	-0.201786	0.00146484
869	10025930747	HSS00008962		4.20968	0.000307679	0.000576973	1.38048	4.4167e-05	4.89354e-05	1.3342	2.26498e-06	3.51667e-06	1.34297	0.263249	2.78404e-05	0.262837	2.86881e-05
870	10025930877	XM_171484		2.87188	0.00115895	0.00123346	0.937226	0.00419825	0.00657761	0.95443	0.00211108	0.00372291	0.95874	-0.166687	0.00880787	-0.203337	0.00134343
871	10025931090	hCT2290991	FTH1	5.0994	0.00284338	0.0039885	1.27691	0.0015443	0.00220525	1.2178	0.010755	0.0149011	1.15392	0.192422	0.00238747	0.184756	0.00356753
872	10025931642	hCT1645727.2		3.25674	0.0251001	0.0546405	0.894241	0.00604123	0.0199621	0.901098	0.00187504	0.00629508	0.901285	-0.183519	0.00387347	-0.164329	0.0098271
873	10025931809	AL162007		2.55622	0.00135696	0.00701678	0.938484	0.00043565	0.00119233	0.943941	0.00210953	0.00264054	0.954004	-0.176757	0.00543378	-0.172432	0.0067069
874	10025931946	hCT2267912		2.88287	0.00482345	0.00731903	1.35124	0.00640225	0.015474	1.26378	0.00529867	0.00649601	1.22553	0.19467	0.00240156	0.183318	0.00429957
875	10025932089	AK098218		3.66906	0.00421274	0.00695837	0.816731	0.00167555	0.00217748	0.829165	0.00164938	0.00244999	0.852348	-0.233708	0.000340296	-0.233968	0.000334996
876	10025932139	AK097936		3.92125	0.158826	0.411651	0.82627	0.00954461	0.0385479	0.759599	0.00128102	0.000750005	0.754909	-0.190908	0.0029233	-0.180884	0.00485127
877	10025932400	AK091819	PIK3R6	2.78286	0.0733334	0.0796397	1.13459	0.0204954	0.011921	1.13062	0.00770783	0.00326419	1.12929	0.168729	0.00800212	0.178651	0.00494793
878	10025932450	hCT2267594		2.44727	0.000607431	0.00333136	0.781796	0.0001387	0.000428557	0.801232	3.99351e-06	1.36495e-05	0.799209	-0.274567	1.1994e-05	-0.26808	1.95252e-05
879	10025932490	AK025384		2.62644	0.00293064	0.00244951	1.23245	0.00663054	0.00314766	1.16407	0.00633436	0.00242394	1.14261	0.247984	8.45068e-05	0.231565	0.000248917
880	10025932770	BC010612	C17orf51	3.10433	0.0466278	0.0265975	1.1164	0.0239676	0.0126835	1.10641	0.00541407	0.00218558	1.10817	0.193527	0.00229785	0.186403	0.00334094
881	10025933115	hCT2270530		2.66751	0.0473531	0.01296	1.24567	0.037923	0.0165146	1.19312	0.00566018	0.00271738	1.21665	0.168831	0.00809361	0.206561	0.00114677
882	10025933132	XM_172995	C19orf38	3.19356	0.0023073	0.000493169	1.13617	0.00379455	0.00103897	1.09873	0.133292	0.0240983	1.05116	0.186041	0.0034704	0.216191	0.000656801
883	10025933149	HSS00123828	LRRC33	3.05005	0.0107846	0.0106108	1.18893	0.000627398	0.000290811	1.19619	8.97646e-05	5.8949e-05	1.20003	0.247967	8.18132e-05	0.248128	8.09171e-05
884	10025933179	BC029259		2.325	0.0119546	0.0176807	1.07889	0.0091629	0.0076493	1.05987	0.01592	0.0154797	1.04358	0.267577	2.10727e-05	0.230957	0.000258696
885	10025933189	XM_211908		3.74026	0.00153834	0.00348568	1.19588	0.000189304	0.000178039	1.18307	0.000320673	0.00011909	1.1636	0.243053	0.000117816	0.252995	5.98629e-05
886	10025933376	XM_212224		3.13703	0.00133836	0.00278664	1.34147	0.000108182	0.000284612	1.29474	0.000208616	0.000202239	1.24587	0.251436	7.92601e-05	0.259774	4.46291e-05
887	10025933707	hCT1823501.2		2.17873	0.0245399	0.0391592	1.07769	0.00326246	0.00505662	1.07471	0.00161707	0.00310588	1.06778	0.223339	0.00040465	0.183947	0.00371875
888	10025933823	HSS00141347		2.40145	0.0354564	0.0532219	0.727554	0.00434852	0.00783193	0.706238	0.000939906	0.0014838	0.721032	-0.189836	0.00279404	-0.185803	0.00344593
889	10025933839	hCT21996.2	PRHOXNB	2.58337	0.00369656	0.0027743	1.09178	0.000842392	0.000681579	1.07705	0.000131488	0.000321746	1.07496	0.226411	0.000334544	0.173184	0.00635961
890	10025933884	BC035396		2.92981	0.000555098	0.000258803	0.869952	0.0029099	0.00315952	0.911789	0.0021503	0.00103939	0.921734	-0.254557	5.18233e-05	-0.269595	1.74438e-05
891	10025934482	AK091599	SNX30	3.55624	0.183634	0.199164	1.07656	0.0420924	0.0633839	1.10185	0.00212175	0.00354522	1.1376	0.167855	0.00847319	0.167542	0.00859788
892	10025934575	hCT1645078.2	AMTN	2.38015	0.0044629	0.001652	1.08176	0.000460982	0.000183702	1.07807	0.000706613	0.000176311	1.06901	0.23541	0.000188764	0.243763	0.00010877
893	10025934609	hCT201265.2	USP51	2.85149	0.000920117	0.00149983	0.854366	0.00474727	0.00260609	0.890386	0.00702023	0.00462532	0.90638	-0.196314	0.00202067	-0.206224	0.00116884
894	10025934823	AL079282		2.96588	0.00120056	0.00111729	0.599797	0.000402033	0.000590503	0.643455	0.00131029	0.0016523	0.698398	-0.244058	0.000106639	-0.211556	0.000820005
895	10025934978	AF086367		2.77942	0.0371723	0.0682771	1.13033	0.0169122	0.0330203	1.11673	0.00568622	0.00423944	1.12131	0.168556	0.00793906	0.179794	0.00459007
896	10025935019	hCT1840262.1		2.31722	0.000184774	0.000519753	1.23612	0.000378907	0.00173986	1.18562	0.000238061	0.000619292	1.16939	0.256234	4.7724e-05	0.246789	9.16494e-05
897	10025935243	hCT2314299		5.37469	0.00466889	0.00644565	1.37384	0.00555235	0.00811553	1.26624	0.018294	0.0149011	1.21311	0.169492	0.00759393	0.181071	0.00430423
898	10025935405	HSS00174094		2.69652	0.00553459	0.00939059	1.2131	0.00133503	0.00148177	1.19199	0.0193754	0.0136824	1.12315	0.179906	0.00464787	0.170406	0.00739046
899	10025935483	HSS00213823		2.2057	0.00972974	0.00731903	1.07209	0.0525677	0.0431235	1.04298	0.0153506	0.0144846	1.04819	0.202914	0.00137557	0.184745	0.00363832
900	10026391229	NM_001623	AIF1	3.82728	0.0042724	0.00356716	1.30423	0.00815314	0.0130855	1.20997	0.00769877	0.00476909	1.19749	0.165705	0.00951286	0.185266	0.00368108
901	10026391741	NM_004635	MAPKAPK3	3.60814	0.0457842	0.028581	1.10464	0.015372	0.010664	1.10367	0.000686407	0.000842214	1.13224	0.190348	0.00277532	0.203972	0.00132664
902	10026392220	NM_005697	SCAMP2	3.60166	0.00866187	0.00173336	1.08614	0.0215492	0.0121876	1.06113	0.0137936	0.0023337	1.05729	0.175373	0.00581531	0.191432	0.00256869
903	10026394239	NM_002829	PTPN3	3.2326	8.34465e-07	4.17233e-06	0.737837	2.68221e-06	7.92742e-06	0.797899	0.00113207	0.00297093	0.865421	-0.283742	6.43344e-06	-0.251043	7.09225e-05
904	10026394679	NM_004895	NLRP3	3.49111	0.00414759	0.00542724	1.22545	0.000262499	0.000290811	1.22705	0.00303876	0.00168145	1.17255	0.200901	0.00153853	0.195991	0.00201268
905	10026396300	NM_002213	ITGB5	4.74828	0.00409269	0.00316614	1.2234	0.000493705	0.000602543	1.214	7.93934e-05	0.000162184	1.21781	0.257088	5.19081e-05	0.252934	6.91303e-05
906	10029224753			3.21112	0.00273842	0.00181836	1.09711	0.000111341	0.00010401	1.09932	7.05719e-05	5.64456e-05	1.09372	0.21904	0.000525862	0.26689	2.13222e-05
907	10029224922			4.08857	0.0809353	0.0726513	0.944408	0.0273508	0.0299401	0.941373	0.00312293	0.00397354	0.934319	-0.168447	0.00798015	-0.195278	0.00204784
908	10029225111			3.59065	0.012518	0.019074	0.932345	0.00207478	0.00436836	0.934442	0.0033381	0.00214267	0.942319	-0.204817	0.00120788	-0.214075	0.000707283
909	10029225422			2.21552	0.0932976	0.103934	1.06002	0.00332308	0.00811553	1.09819	0.00173986	0.00177181	1.09095	0.239415	0.000145273	0.213169	0.000746089
910	10029225483			2.71469	0.0967425	0.0353134	1.02829	0.00192207	0.00152218	1.04886	0.000904679	0.00100225	1.04541	0.198768	0.00169284	0.216325	0.000618916
911	10029225486			2.37811	0.00925392	0.00455636	1.07879	0.00117493	0.000742316	1.07179	0.000811517	0.000850022	1.06245	0.218741	0.000535448	0.202618	0.00136709
912	10031919486			3.33962	0.00106704	0.00435942	1.18803	0.00109315	0.00308055	1.14472	0.00263685	0.005647	1.12203	0.207386	0.00104355	0.222952	0.000414407
913	10031919487			3.59755	0.010052	0.0134815	1.16304	0.00386363	0.00689471	1.13994	0.00637829	0.0111749	1.12194	0.180576	0.00441295	0.192389	0.0023917
914	10031919488			3.63447	0.00311428	0.00939059	1.19166	0.00188494	0.00612646	1.15498	0.00222903	0.00513685	1.14033	0.197749	0.00179018	0.204723	0.00121433
915	10031919489			3.7167	0.00582498	0.00731903	1.17306	0.00356466	0.00570345	1.13913	0.00494963	0.00649828	1.12226	0.184822	0.00355543	0.209308	0.000934327
916	10031919490			3.80494	0.00402123	0.00417024	1.18241	0.00167245	0.00278228	1.15149	0.00424534	0.00530207	1.12602	0.195663	0.0020056	0.21412	0.000705423
917	10031919491			3.55176	0.00300819	0.0119701	1.18223	0.00120926	0.00722545	1.15215	0.00266832	0.00591886	1.13069	0.200866	0.00150747	0.2241	0.000386116
918	10031919493			3.75597	0.00496185	0.0213439	1.18519	0.00101274	0.00415856	1.16457	0.00241071	0.00513685	1.13726	0.204379	0.00123816	0.223629	0.000397506
919	10031919494			3.83831	0.00620186	0.0170181	1.17589	0.00167823	0.00642401	1.15158	0.00511199	0.00908416	1.12494	0.191441	0.0025155	0.217248	0.000585675
920	10031919495			3.7536	0.00352222	0.00864828	1.19617	0.00101292	0.00315952	1.16469	0.00264698	0.00474387	1.1374	0.205905	0.00113561	0.228824	0.000287576
921	10031919496			3.89157	0.00530034	0.00763297	1.17257	0.00107586	0.00173986	1.15344	0.00302827	0.00378418	1.12759	0.196997	0.00186527	0.228178	0.00029952
922	10031919497			3.94762	0.00268257	0.00763297	1.19164	0.000526071	0.00220525	1.16767	0.00101203	0.00285751	1.14481	0.211766	0.000810022	0.238369	0.000155623
923	10031919498			3.85702	0.00581849	0.0157579	1.17791	0.00132501	0.00598246	1.15613	0.00278747	0.00547206	1.13431	0.190627	0.00262641	0.223083	0.000411075
924	10031919499			3.6024	0.00228912	0.00417024	1.21908	0.00118333	0.00251067	1.17244	0.00205642	0.00276339	1.14972	0.206108	0.00112253	0.231146	0.000248256
925	10031919500			3.62857	0.00156277	0.00381404	1.22275	0.000480235	0.00119233	1.18414	0.000754416	0.00109738	1.16915	0.211327	0.000831026	0.232938	0.000221381
926	10031919501			3.29812	0.00397927	0.00519645	1.20294	0.00115412	0.00160605	1.16996	0.00141287	0.00136077	1.15931	0.202521	0.00137455	0.235433	0.000188482
927	10031919502			3.57685	0.049531	0.0448353	1.06838	0.00332648	0.00315952	1.08049	0.00138116	0.00133681	1.07096	0.207737	0.00102281	0.20714	0.00105836
928	10031919835	XM_371630	RPS27	4.5126	0.352187	0.57814	0.922938	0.0274655	0.0480911	0.864707	0.00139827	0.00121707	0.841341	-0.189775	0.00285993	-0.181301	0.00441429
929	10031919841	NM_207173	NPSR1	2.42524	2.25902e-05	0.000105023	1.09752	1.68681e-05	0.000118136	1.07838	0.000180006	0.000944197	1.05875	0.289665	4.21506e-06	0.217331	0.00063006
930	10031920095	ENST00000330459	KPNA2	4.04092	0.0557431	0.0546405	1.08972	0.0377944	0.0354159	1.07842	0.00842935	0.00702387	1.08419	0.173143	0.00648099	0.166555	0.00886225
931	10031920162	NM_203373	FBXL22	2.19197	0.000113487	0.000467837	0.872318	0.00225908	0.00584143	0.909376	0.0153075	0.0108522	0.936159	-0.203419	0.00130698	-0.199816	0.00159772
932	10031920221	NM_199129	TMEM189	3.54584	0.151652	0.133779	1.09679	0.0268649	0.0148349	1.1119	0.00152344	0.0010137	1.1386	0.192804	0.00243808	0.185049	0.00365141
933	10031920242	AF071178	HERC2P7	3.18095	0.00080514	0.00129557	1.25294	0.00670523	0.00358283	1.17026	0.00659752	0.00254023	1.15141	0.214415	0.000711033	0.207374	0.00106938
934	10031920280	NM_182905	WASH1	3.69237	0.00339276	0.00519645	0.860445	0.00546956	0.010664	0.888645	0.00756842	0.0178745	0.905517	-0.169465	0.00760383	-0.166756	0.00864213
935	10031920306	BC073889	LGALS9C	3.94158	0.00445121	0.00519645	1.18292	0.000569582	0.00035876	1.1789	6.25253e-05	6.70552e-05	1.19008	0.231049	0.000257199	0.242435	0.000122769
936	10031920308	NM_203422	LRRN4CL	4.0906	0.00259757	0.00701678	1.1752	0.000971496	0.00212622	1.15777	0.000900745	0.000907302	1.14266	0.18785	0.00309967	0.19259	0.00241562
937	10031920326	NM_207469	DEFB132	3.16208	0.00232017	0.00117075	0.522629	0.00515425	0.00616991	0.619336	0.0127174	0.0165599	0.6984	-0.191784	0.00262665	-0.180548	0.00466861
938	10031920390	AW183721	PRSS50	2.29475	0.340191	0.371328	1.02925	0.037616	0.0527927	1.0509	0.0029037	0.00793195	1.06182	0.209698	0.000935961	0.184348	0.00371307
939	10031920433	ENST00000342052	TMEM106A	3.10913	0.00116485	0.00142866	1.20225	0.000383854	0.000701308	1.16599	0.000383675	0.000542462	1.15117	0.207149	0.00105784	0.196657	0.00190012
940	10031920435	NM_001004136	OR2T2	4.20602	0.073963	0.14508	0.798966	0.00311828	0.00931227	0.750669	0.000398815	0.000238836	0.750073	-0.214859	0.000675245	-0.201903	0.00142286
941	10031920441	NM_199358	FOXD4L3	2.51273	0.00102919	0.00173336	0.878578	0.00533688	0.00774837	0.911433	0.00850099	0.00993317	0.927714	-0.166354	0.00894608	-0.174803	0.00597936
942	10031920460	NM_199338	GOLGA6L5	3.90887	0.00311506	0.00364649	0.776816	0.00859714	0.00910252	0.828716	0.00963426	0.00452143	0.850852	-0.170081	0.00738361	-0.166399	0.00878787
943	10031920701	BQ015859	CSTA	3.60567	0.000260711	0.000465095	1.40164	0.000665843	0.0020948	1.27835	0.000611067	0.0009799	1.24416	0.248597	0.000121568	0.230957	0.000367589
944	10031920763	ENST00000005905	KIAA0100	3.39855	0.00160724	0.00560838	1.15212	0.000862777	0.00167143	1.13146	0.00050652	0.000230253	1.12364	0.199712	0.00171723	0.197962	0.00188876
945	10031920806	BQ446275	HBB	2.60568	0.00564843	0.00566721	1.65642	0.0112485	0.0225954	1.39843	0.0204494	0.0423303	1.28483	0.221717	0.000459198	0.18166	0.00425597
946	10031920827	ENST00000336156	C22orf9	4.34772	0.000187218	0.00048095	1.25622	7.21216e-06	2.15173e-05	1.24232	5.96046e-09	1.19209e-07	1.26405	0.326269	1.7465e-07	0.330557	1.1757e-07
947	10033668438	NM_000617	SLC11A2	3.5707	0.02257	0.00652158	1.12169	0.00938517	0.00274241	1.11049	0.000442326	8.38637e-05	1.12427	0.180541	0.004934	0.218566	0.000633584
948	10033668443	NM_001063	TF	3.65887	0.000734329	0.0014627	0.496723	0.000512242	0.00107276	0.564673	0.000685215	0.00125921	0.629215	-0.251217	0.000102422	-0.242847	0.000175945
949	10033668486	NM_020038	ABCC3	3.25812	0.00670701	0.0176807	1.5489	0.00450188	0.00673443	1.43559	0.000145972	0.000207424	1.49772	0.248416	8.20561e-05	0.24886	7.96019e-05
950	10033668495	NM_021194	SLC30A1	2.92171	0.0212632	0.0244176	1.1478	0.00645357	0.00783807	1.12958	0.00466353	0.00241566	1.13007	0.179433	0.00493421	0.182485	0.00423753
951	10033668538	NM_018663	PXMP2	3.60438	0.0104806	0.0141193	0.822519	0.0088675	0.0114885	0.845198	0.0030942	0.00353223	0.850021	-0.176646	0.00640053	-0.182296	0.00487479
952	10033668571	NM_000941	POR	3.96397	0.0594891	0.0492608	1.14949	0.00475872	0.00349063	1.17372	0.000410199	0.000238538	1.1895	0.218863	0.000789657	0.220446	0.000721466
953	10033668651	NM_001066	TNFRSF1B	4.57114	0.00305951	0.00432181	1.23906	3.76701e-05	3.18289e-05	1.26132	2.70009e-05	7.45058e-06	1.23742	0.291505	4.58661e-06	0.301741	2.01855e-06
954	10033668653	NM_003645	SLC27A2	2.69132	0.000904024	0.000467837	0.541724	0.00192767	0.00188386	0.638022	0.000632346	0.000607729	0.644677	-0.199726	0.00160571	-0.207893	0.0010137
955	10033668657	NM_001061	TBXAS1	3.82139	3.95179e-05	4.31538e-05	1.39079	3.33786e-06	1.96695e-06	1.33921	1.65105e-05	5.48363e-06	1.28421	0.282084	6.71307e-06	0.3087	7.48367e-07
956	10033668679	NM_000754	COMT	4.49042	9.74536e-05	0.00022614	1.1849	6.67572e-06	9.47714e-06	1.17629	8.81553e-05	8.14199e-05	1.13492	0.26494	5.50364e-05	0.307674	2.42222e-06
957	10033668691	NM_021734	SLC25A19	3.40135	0.00376099	0.00995088	1.13485	0.00329089	0.00870842	1.10992	0.0179111	0.0161247	1.07774	0.170442	0.00976386	0.173398	0.00854929
958	10033668700	NM_003982	SLC7A7	3.87146	0.000904858	0.000650346	1.38233	0.000193655	0.000222743	1.33018	0.00201571	0.000657678	1.24691	0.203204	0.00170157	0.241253	0.000182601
959	10033668774	NM_003977	AIP	3.65295	0.144348	0.300774	0.895363	0.00621277	0.0212433	0.846504	0.00015384	0.000211656	0.822337	-0.189683	0.00287378	-0.195277	0.00213659
960	10033668842	NM_000398	CYB5R3	5.01143	0.000555277	0.000576973	1.23475	2.53916e-05	4.13656e-05	1.24324	8.28505e-06	1.07884e-05	1.23294	0.279717	8.0738e-06	0.277735	9.41127e-06
961	10033668856			4.35667	0.00199282	0.00268155	1.18717	0.000197768	0.00030309	1.18917	2.34842e-05	3.46899e-05	1.19391	0.260293	5.78605e-05	0.265964	3.91847e-05
962	10033668864	NM_020689	SLC24A3	4.48265	0.00719529	0.00795883	1.17552	0.00565589	0.00657761	1.15765	0.000632286	0.000865817	1.18023	0.226335	0.000345718	0.228444	0.000303084
963	10033668871	NM_001831	CLU	2.63336	0.00899422	0.00566721	1.11577	0.0015713	0.00198591	1.11995	0.00174272	0.00372291	1.10627	0.217495	0.000577098	0.209369	0.000931087
964	10033668872	NM_007256	SLCO2B1	4.30164	0.0158635	0.0238454	1.214	0.00435591	0.00415856	1.19576	0.00170141	0.00162357	1.19788	0.200849	0.00150886	0.187329	0.00312286
965	10033668887	NM_001001290	SLC2A9	2.89127	9.51886e-05	0.000358462	1.3446	0.000345886	0.0010106	1.23296	0.00319612	0.00505596	1.17778	0.190276	0.00267569	0.203828	0.00127723
966	10033668934	NM_003840	TNFRSF10D	3.33612	0.00814432	0.00586182	1.21388	0.00288963	0.00322956	1.18309	0.0342448	0.00307542	1.13424	0.182178	0.00414607	0.257529	4.35528e-05
967	10033668989	NM_013363	PCOLCE2	4.88243	5.34654e-05	0.000304818	1.34264	0.000276268	0.000955939	1.2378	0.00223434	0.00390947	1.19172	0.248246	8.58515e-05	0.239344	0.000155394
968	10033669048	NM_019899	ABCC1	3.26243	0.0165939	0.0124563	1.15935	0.00320274	0.00106811	1.15194	0.000210881	6.56843e-05	1.16195	0.272457	1.4073e-05	0.256317	4.57768e-05
