# Supplementary material for: Inverse Regulation of Inflammation and Mitochondrial Function in Adipose Tissue Defines Extreme Insulin Sensitivity in Morbidly Obese Patients
Source: Oxford University Press journal article supplement (doi:10.2337/db12-0399), 2012-12-07
Supplement: db120399-sup-suppl_table_2_rygb_genelist2_subcutaneous_546.xls [file db120399-sup-suppl_table_2_rygb_genelist2_subcutaneous_546.xls]

## Sheet: Subcutaneous_546
Row	ProbeID	Transcript	Gene Symbol	Avgeraged LogInten	top 10% vs. bottom 10%			top 15% vs. bottom 15%			top 20% vs. bottom 20%			Pearson		Spearman
					ANOVA p-value	K-Wallis p-value	Fold Change	ANOVA p-value	K-Wallis p-value	Fold Change	ANOVA p-value	K-Wallis p-value	Fold Change	Corr Coeff	p-value	Corre Coeff	p-value
1	10023804746	NM_005070	SLC4A3	2.54397	0.00142193	0.000661135	1.36477	0.00414258	0.00217909	1.25103	2.28286e-05	1.19805e-05	1.32795	0.270289	0.00012239	0.325706	3.00617e-06
2	10023804762	Contig4382_RC	MAP1B	4.5363	0.00630045	0.00856149	1.23229	0.000937879	0.000520766	1.23923	2.81334e-05	2.02656e-05	1.27231	0.2201	0.00198963	0.265316	0.000177885
3	10023805048	NM_017429	BCMO1	1.82414	0.00989026	0.00856149	1.41821	0.00246227	0.00176597	1.33144	0.0134808	0.0233251	1.23828	0.202333	0.00435334	0.197808	0.0053315
4	10023805559	NM_018099	FAR2	2.78789	0.000644326	0.000939012	1.30282	0.00617695	0.00471729	1.18502	0.0151229	0.00811553	1.14756	0.228277	0.00125387	0.234633	0.000904298
5	10023805619	NM_001765	CD1C	2.9537	0.00310099	0.00372303	0.703114	0.0358151	0.0291369	0.815451	0.00490457	0.00387073	0.799073	-0.210832	0.00294095	-0.191418	0.00704834
6	10023806014	Contig39389_RC	COL4A4	2.55918	0.000249803	0.000137508	2.04671	1.16825e-05	9.59635e-06	1.91381	2.43187e-05	3.39746e-06	1.77068	0.28248	5.77593e-05	0.328777	2.39302e-06
7	10023806230	NM_016524	SYT17	2.4368	0.000212789	0.000218809	0.681702	0.0040139	0.00127965	0.787432	0.0284523	0.00646806	0.85377	-0.224834	0.00153386	-0.225649	0.00147281
8	10023806850	Contig49670_RC	FGD6	2.54629	0.0123575	0.0387905	1.17568	0.00411826	0.0138116	1.16045	0.00573498	0.00832862	1.14261	0.185784	0.00913179	0.187226	0.0085972
9	10023807007	Contig65401_RC	SGMS2	3.29809	0.00187945	0.00269979	1.31068	0.000284791	0.000341177	1.2904	0.0125686	0.00238657	1.20025	0.216985	0.00237361	0.226592	0.0014876
10	10023807488	Contig48177_RC	LIG4	2.98113	0.0120369	0.0406581	1.23627	0.000311196	0.00114733	1.27509	0.00403208	0.00953984	1.20367	0.202583	0.00430432	0.193742	0.00637401
11	10023807516	NM_006111	ACAA2	4.50344	0.035005	0.0445387	1.18839	0.00300491	0.00632924	1.23761	0.00561684	0.00255954	1.20364	0.201941	0.00702939	0.208016	0.00546403
12	10023807728	Contig33834_RC		2.6995	0.000105381	0.000202656	1.34603	0.000139415	0.000149488	1.26989	9.19104e-05	1.40667e-05	1.26366	0.269324	0.000134976	0.28965	3.82537e-05
13	10023808023	Contig46289_RC	ANKRD57	3.55139	0.0208772	0.0320318	1.17516	0.00114292	0.00350899	1.23221	0.0108294	0.0133281	1.16121	0.183981	0.00984187	0.18735	0.00855241
14	10023808107	NM_018663	PXMP2	3.56622	0.000246882	0.000661135	0.788079	0.00106293	0.00182939	0.830595	0.00614226	0.00310195	0.863076	-0.210919	0.00292906	-0.237472	0.000779266
15	10023808120	AF131830		2.25611	0.0212999	0.0226175	0.851631	0.0014658	0.000751913	0.836603	0.00103408	0.000705838	0.858207	-0.213837	0.00261713	-0.245187	0.000532838
16	10023808146	NM_004753	DHRS3	3.79516	0.00970381	0.0126574	0.793875	0.00347716	0.00858617	0.808537	0.000766397	0.00110894	0.807985	-0.21543	0.00242607	-0.213223	0.00269432
17	10023808429	Contig48715_RC		2.37288	0.0142468	0.0369963	1.32174	0.000456452	0.00105834	1.39461	0.00842863	0.00328863	1.25666	0.252553	0.000368096	0.281276	6.7971e-05
18	10023808432	NM_001823	CKB	2.96094	0.00725466	0.00693393	0.796278	0.00344861	0.0029031	0.804984	0.00290424	0.00155967	0.820751	-0.2032	0.00470183	-0.242772	0.000691601
19	10023808553	NM_001532	SLC29A2	2.61735	0.0186242	0.0426013	0.926727	0.00456154	0.0105998	0.927208	0.00685567	0.00935042	0.938457	-0.215397	0.00236769	-0.223595	0.00158626
20	10023808730	NM_000090	COL3A1	5.30406	0.00351769	0.00885475	1.50583	0.000306606	0.000885248	1.55339	0.000680566	0.000700116	1.50221	0.246058	0.000786291	0.246752	0.000758956
21	10023809051	Contig43601_RC	PDE1A	2.75894	0.0121678	0.0119822	1.27869	0.0036307	0.00400621	1.24527	0.00124985	0.00225842	1.24494	0.245683	0.000501664	0.224931	0.00148404
22	10023809166	NM_001919	DCI	3.88984	0.00528491	0.00511026	0.860699	0.0037899	0.000981688	0.865552	0.00130588	0.000346959	0.87045	-0.225699	0.00164573	-0.276651	0.000102565
23	10023809171	AF052160		2.59301	0.00200105	0.00115412	0.899472	0.000173211	0.000216961	0.897225	0.00480562	0.0023644	0.929195	-0.210707	0.00295839	-0.211779	0.00281265
24	10023809174	NM_001158	AOC2	3.40881	0.0125633	0.018275	1.29742	0.0105434	0.00663751	1.24265	0.00275111	0.00232768	1.25432	0.2211	0.00217256	0.218778	0.00242486
25	10023809183	Contig2647_RC	BCAT1	3.45777	0.00216836	0.00289816	1.55999	4.61936e-05	9.78708e-05	1.60892	0.00691855	0.000552714	1.3975	0.242333	0.000601491	0.258382	0.000246434
26	10023809218	AL133104	ULK4	2.84336	0.0458591	0.0854326	0.918341	0.00136179	0.00219428	0.906624	0.000688374	0.00116497	0.909642	-0.187135	0.00862998	-0.189817	0.00770541
27	10023809450	Contig26616_RC		2.8198	0.00932521	0.0155205	1.47668	0.000186205	0.000440061	1.54723	0.00129038	0.00304174	1.44331	0.255354	0.000338317	0.228076	0.00142221
28	10023809641	Contig27391_RC		3.70056	0.018535	0.0292575	1.32511	0.001275	0.00424367	1.3403	0.0295155	0.0065729	1.22526	0.214812	0.00284329	0.25978	0.00028433
29	10023809782	NM_012296	GAB2	4.34313	0.104597	0.0779173	0.87389	0.0155524	0.0126632	0.856793	0.00898993	0.00947428	0.870768	-0.217667	0.00412637	-0.211083	0.00544378
30	10023810095	NM_018330	KIAA1598	3.77705	0.00033313	0.00128192	1.35366	4.84586e-05	0.000332773	1.32039	0.00101304	9.78112e-05	1.25697	0.255275	0.000583969	0.31166	2.28826e-05
31	10023810156	NM_012190	ALDH1L1	3.09551	0.00567126	0.00536418	0.694418	0.00821227	0.00911886	0.752854	0.00600392	0.00331652	0.769394	-0.205143	0.00383019	-0.21048	0.00299005
32	10023810366	NM_001440	EXTL3	3.09126	0.0153623	0.0264188	0.886557	0.000663877	0.00203729	0.871361	0.0102036	0.00499278	0.907888	-0.210178	0.00360773	-0.208238	0.00393795
33	10023810634	NM_000070	CAPN3	2.17208	0.00349909	0.00421083	0.856	0.000599861	0.000520766	0.860668	0.01043	0.00688458	0.901434	-0.20867	0.00325422	-0.218495	0.00203854
34	10023810927	NM_000800	FGF1	2.84097	0.0244721	0.0305092	1.25358	0.0240197	0.00807017	1.21386	0.00353682	0.00179076	1.23246	0.225012	0.00147805	0.271564	0.000113331
35	10023811452	Contig30995_RC	PSMD6	2.14778	0.0273358	0.0406581	1.33557	0.00325483	0.00487256	1.34028	0.00569272	0.00535107	1.27115	0.187107	0.00864017	0.195974	0.00590824
36	10023811688	Contig55727_RC	SLC7A11	2.20098	0.00451225	0.00172698	1.16891	7.42078e-05	4.25577e-05	1.19608	3.65973e-05	4.1008e-05	1.17159	0.248824	0.000436913	0.293729	2.93515e-05
37	10023811694	Contig31482_RC		3.40576	0.0225646	0.0264188	0.899341	0.000715733	0.00101936	0.885099	0.0201467	0.00735253	0.924454	-0.190918	0.00735208	-0.2128	0.00274874
38	10023811762	Contig28455_RC		2.59338	0.000855863	0.00161624	1.49046	0.000153661	0.000314534	1.44684	0.000835717	0.00217408	1.33192	0.230619	0.00114613	0.215177	0.00245557
39	10023811849	Contig40145_RC	QKI	2.72505	0.00150537	0.00210255	1.26719	0.000682175	0.000853658	1.25071	0.000763893	0.0012241	1.22728	0.203378	0.00415174	0.215399	0.00236745
40	10023811853	Contig38906_RC	DNAJB13	3.01058	0.0014869	0.00115412	0.904366	0.00173676	0.00277203	0.920513	0.00920427	0.00973278	0.937659	-0.214437	0.00247905	-0.185109	0.0092107
41	10023812000	NM_005165	ALDOC	4.58367	0.00206113	0.00210255	0.654416	0.00369608	0.00328207	0.722632	0.00941604	0.00674313	0.782368	-0.207557	0.00342684	-0.217934	0.00209488
42	10023812095	Contig48259_RC	GRIA3	2.05001	0.000139236	0.000370264	1.73113	0.000412285	0.000121117	1.51106	0.00314224	0.00111109	1.37873	0.270113	0.000123695	0.27041	0.000121505
43	10023812249	NM_006898	HOXD3	3.00203	0.0149702	0.0290491	0.898714	0.00235957	0.00362772	0.897301	0.00185645	0.0012241	0.905117	-0.212722	0.00275886	-0.224876	0.00153066
44	10023812266	NM_016606	REEP2	2.69256	0.0142488	0.0406581	0.724968	0.00913477	0.00735587	0.760249	0.0574454	0.033156	0.844905	-0.194954	0.00604584	-0.196949	0.00553814
45	10023812537	NM_018567	TNS1	3.58452	0.0328316	0.0477968	0.80869	0.004089	0.00664246	0.792279	0.008021	0.00632453	0.828893	-0.229085	0.00181242	-0.219954	0.00277321
46	10023812888	NM_014890	FILIP1L	3.16	0.0198374	0.0138937	1.24586	0.00429475	0.00321889	1.21703	0.00371009	0.00344026	1.2166	0.204743	0.00399415	0.218882	0.00205469
47	10023812890	Contig43703_RC		2.6753	0.071322	0.109436	1.19684	0.00676453	0.00807017	1.23718	0.00147974	0.00220704	1.24617	0.214578	0.00246239	0.249536	0.000405897
48	10023813308	Contig24363_RC		2.36715	0.0163378	0.0226175	0.892166	0.00641167	0.00710911	0.899243	0.0200959	0.0166885	0.927236	-0.206655	0.00365961	-0.207554	0.00351122
49	10023813410	NM_006633	IQGAP2	3.34419	0.0200751	0.019385	1.23258	0.000893831	0.00118995	1.29095	0.0159382	0.00378668	1.20649	0.184125	0.0095959	0.233803	0.000944214
50	10023813688	Contig6941_RC		2.57529	0.0119944	0.0165637	0.923033	0.000736713	0.00182939	0.917655	0.00621569	0.00717545	0.93669	-0.231512	0.00106288	-0.231505	0.00106328
51	10023813792	Contig32213_RC	ALDH1L2	2.93767	0.0109048	0.00906265	1.28379	0.00149149	0.00164515	1.27368	0.00450194	0.00460613	1.20993	0.222104	0.00170799	0.231033	0.00108936
52	10023814153	Contig47308_RC	TSHZ2	3.93252	0.00155526	0.00349885	1.3026	0.00236982	0.00250191	1.23417	0.00181365	0.00155479	1.1998	0.213051	0.00264817	0.214572	0.00246305
53	10023814425	Contig57174_RC	LAMP2	3.72285	0.0027743	0.00163466	1.25153	0.00047791	0.000287354	1.25254	0.00298911	0.000878692	1.20121	0.233949	0.00119524	0.253745	0.0004265
54	10023814615	NM_002861	PCYT2	3.28483	0.000221908	0.000233233	0.751471	0.000792325	0.00164747	0.801656	0.0133108	0.0090422	0.855293	-0.216225	0.00239732	-0.211734	0.00296386
55	10023814688	NM_016581	ECSIT	3.34166	0.0115914	0.0192345	0.86223	0.000128627	0.00025481	0.829114	0.00528562	0.0028367	0.874094	-0.232416	0.00169194	-0.252272	0.00063446
56	10023814873	NM_004796	NRXN3	2.95977	0.000327229	0.000626206	1.48409	0.00149143	0.00368863	1.33303	0.000729978	0.0012849	1.32986	0.226099	0.00148158	0.25352	0.000348809
57	10023814951	NM_016459		2.33651	0.00026381	0.000615716	0.825674	0.00232559	0.000822365	0.853664	0.0162601	0.00535107	0.896346	-0.206838	0.00354279	-0.224597	0.00150904
58	10023815069	AF052152	DCLK1	2.82928	0.0225244	0.0141097	1.21245	0.000236034	0.000341177	1.33538	0.00271743	0.00255817	1.22499	0.190507	0.00748235	0.186831	0.00874065
59	10023815220	Contig37598	ALDH6A1	3.46551	0.00787687	0.00328213	0.825336	0.0240625	0.0178637	0.86954	0.00969148	0.00769866	0.870745	-0.195354	0.00620315	-0.198377	0.00543486
60	10023815767	NM_006211	PENK	2.61727	0.00166607	0.00255168	1.54434	0.00532568	0.0064919	1.34743	0.00472587	0.00702864	1.28226	0.254071	0.000314974	0.245126	0.000517117
61	10023815816	NM_000480	AMPD3	3.39593	0.0437859	0.0226175	1.18772	0.00741464	0.00362772	1.18222	0.00691712	0.00125396	1.16843	0.199249	0.00500067	0.241216	0.000638655
62	10023815826	NM_002081	GPC1	4.39503	0.00419337	0.00569391	1.29121	0.011513	0.0105998	1.20193	0.000911713	0.00100774	1.22673	0.230072	0.00114431	0.250091	0.000393594
63	10023816108	NM_006139	CD28	2.80398	0.00250781	0.00421083	1.40032	0.000536203	0.000822365	1.37584	0.00362641	0.00113839	1.29024	0.238682	0.0007544	0.29861	2.12625e-05
64	10023816122	NM_012345	NUFIP1	2.48604	0.00280744	0.00239307	0.913611	0.00246048	0.0019626	0.919807	0.00232941	0.000525117	0.921763	-0.211303	0.00302424	-0.230876	0.00116519
65	10023816282	Contig819_RC		2.75622	0.0211329	0.0126574	1.21775	0.00124013	0.000681043	1.24039	0.026332	0.00378668	1.15437	0.192597	0.00669874	0.225587	0.00143606
66	10023816340	Contig8891_RC		2.88527	0.00536764	0.00350034	1.23736	0.00133067	0.00261587	1.23599	0.00114578	0.00175792	1.20357	0.19288	0.00675835	0.211195	0.00296433
67	10023816389	Contig38285_RC	FAR2	2.95277	0.00172657	0.00604182	1.31023	0.000117362	0.000396252	1.28047	0.00320095	0.00303334	1.20609	0.22039	0.0018583	0.23788	0.000762661
68	10023817208	Contig6654_RC		2.79114	0.0580465	0.132654	1.15776	0.00455946	0.00911886	1.18257	0.00175858	0.00259018	1.18605	0.198986	0.00505959	0.223665	0.00158076
69	10023817221	Contig16883_RC		2.58694	0.000434518	0.00115412	1.20375	0.0132359	0.00858021	1.11826	0.00601888	0.00470644	1.11005	0.231945	0.00103942	0.214435	0.00247927
70	10023817294	Contig15210_RC		1.7494	0.00792539	0.0226175	0.829734	0.0141134	0.0166219	0.84344	0.000846446	0.000705838	0.822631	-0.254932	0.000310978	-0.275191	9.47423e-05
71	10023817621	Contig51943_RC	EML6	2.30031	0.00414908	0.00720334	1.31377	0.000128388	0.000380933	1.32127	0.00757098	0.00992912	1.19184	0.195697	0.00585193	0.198227	0.00523343
72	10023817727	Contig31613_RC	C11orf94	2.40266	0.0208848	0.0758386	0.945279	0.000312924	0.00158763	0.931055	0.00624871	0.0133281	0.952639	-0.236937	0.00080153	-0.211639	0.00283136
73	10023817791	Contig55764_RC	PLEKHH2	2.96629	0.000614226	0.00141406	1.34137	8.04663e-06	2.58088e-05	1.37497	0.000182152	0.000176668	1.29941	0.228835	0.00125486	0.246263	0.000502586
74	10023817989	Contig20603_RC		2.34497	0.0265312	0.0352732	1.42709	0.00370842	0.00219428	1.45251	0.000314355	0.000296593	1.48289	0.231196	0.00111287	0.254353	0.00032128
75	10023818229	Contig57142_RC	EEA1	3.99211	0.0079993	0.0276495	1.22962	0.00193012	0.00586432	1.23581	0.00583327	0.010635	1.18812	0.21232	0.00281178	0.187587	0.0084677
76	10023818329	NM_020038	ABCC3	3.57253	0.00942791	0.0174612	1.6013	0.00438923	0.0105998	1.46368	0.000611424	0.00111109	1.48027	0.268934	0.000132756	0.260231	0.000221528
77	10023818657	NM_005609	PYGM	2.51027	0.00427055	0.00255168	0.792599	0.00902242	0.00225604	0.834706	0.00763482	0.00210756	0.848621	-0.21629	0.00226812	-0.257167	0.000264192
78	10023818783	Contig12294_RC	ZNF428	2.87963	0.00354916	0.00604182	0.826694	0.00907153	0.0168758	0.881333	0.139491	0.0553039	0.929499	-0.195973	0.00578161	-0.188844	0.00786915
79	10023818807	NM_001338	CXADR	2.78383	0.00662154	0.0113391	1.2432	0.00575328	0.0126566	1.19166	0.00367331	0.00501943	1.17145	0.257617	0.000267085	0.218018	0.00214242
80	10023818826	Contig23475_RC	MICALL2	2.51871	0.000638545	0.000496149	1.56865	0.000282049	0.000176609	1.46444	0.000219584	0.000158191	1.4141	0.290856	3.53868e-05	0.295284	2.65028e-05
81	10023818902	NM_007328	KLRC1	2.43532	0.00394469	0.00196976	0.883837	0.00388801	0.00225604	0.908036	0.0367623	0.013073	0.939657	-0.193411	0.006605	-0.208166	0.0034135
82	10023819078	NM_004490	GRB14	2.59674	0.00111562	0.00255168	1.42685	0.000161171	0.000276864	1.40432	0.000303268	0.000346363	1.36763	0.240418	0.000666508	0.279199	7.09425e-05
83	10023819095	AB007946	PDE4DIP	2.39574	0.0021835	0.00447589	1.25832	0.00677037	0.0115877	1.18405	0.00307816	0.00422394	1.17471	0.216032	0.00229647	0.228814	0.0012201
84	10023819239	NM_000693	ALDH1A3	3.38411	0.0453991	0.0392112	1.29697	0.00035584	0.000399292	1.41727	0.00469726	0.00272649	1.28229	0.205201	0.00440383	0.244494	0.000652795
85	10023819250	Contig54847_RC		4.76793	0.0102136	0.0174612	1.37307	0.000636041	0.000886142	1.40723	0.00152624	0.00241911	1.32206	0.224754	0.00153998	0.217417	0.00220542
86	10023819548	Contig37708_RC	SLC35F1	2.54843	0.00387645	0.00505179	0.734926	0.0297239	0.0427854	0.837907	0.0121768	0.01524	0.834057	-0.192721	0.00666301	-0.188434	0.0080073
87	10023819819	Contig53646_RC	C1orf151	3.56365	0.00207019	0.00129688	0.826555	0.00124663	0.00205416	0.851087	0.0457922	0.00820887	0.902759	-0.226337	0.00206355	-0.249779	0.000649598
88	10023819888	NM_014553	TFCP2L1	2.3182	0.0140997	0.00763291	1.38752	0.00305766	0.00233537	1.36058	0.004682	0.00225842	1.2972	0.207684	0.00340675	0.230942	0.00109446
89	10023820228	NM_006043	HS3ST2	2.65847	0.0257352	0.00569391	1.47403	0.00336087	0.000696123	1.49138	0.0234908	0.0026179	1.30157	0.225369	0.00149348	0.261296	0.000216264
90	10023820303	Contig42962_RC		2.49035	0.0084424	0.00349885	1.44704	0.00757295	0.00339383	1.32619	0.0163747	0.00828248	1.25313	0.202705	0.00428047	0.200993	0.0046246
91	10023820328	Contig51138_RC	MYO5A	3.7117	0.0465744	0.0535347	1.18337	0.000335336	0.000562549	1.30105	0.00794786	0.00470644	1.2022	0.187373	0.00837511	0.2204	0.00185737
92	10023820766	Contig52137_RC	PFKFB2	3.27902	0.00161725	0.00308704	1.29396	0.00206894	0.00217909	1.21439	0.025995	0.00992912	1.13921	0.207133	0.00358005	0.203538	0.00421882
93	10023820775	Contig24493_RC		2.66502	0.00148928	0.00203335	0.820406	0.000257254	0.000291288	0.842576	0.00143862	0.000881255	0.87789	-0.259632	0.00025641	-0.262615	0.000216182
94	10023820814	NM_002311	LIG3	2.90844	0.00252992	0.00224352	0.868457	0.000606298	0.0009197	0.879234	0.015075	0.00395644	0.918017	-0.24406	0.000547927	-0.20749	0.00343754
95	10023820820	Contig49480_RC	TMEM108	2.49332	0.000305533	0.0003438	0.692144	0.000235677	0.000216961	0.732116	0.00117284	0.0014137	0.788091	-0.237342	0.000784588	-0.249168	0.000414253
96	10023820825	NM_018502	TMCO6	2.96026	0.000324309	0.00172698	0.816995	0.00013566	0.00106621	0.843817	0.000454664	0.00205934	0.872564	-0.280647	6.76804e-05	-0.216495	0.00230548
97	10023821372	Contig51373_RC		2.88915	0.0121144	0.0511779	0.91831	0.000472546	0.00415808	0.895349	0.00746614	0.0105153	0.919157	-0.191798	0.0076973	-0.189733	0.00839285
98	10023821432	AF034803	PPFIBP2	3.03854	0.00108796	0.00100625	1.21573	0.00162405	0.00387627	1.16956	0.00061059	0.00138032	1.14803	0.249604	0.000404371	0.238068	0.000755108
99	10023821682	Contig29802_RC		2.58632	0.00739312	0.00604182	1.19916	0.0773021	0.100712	1.10488	0.00305939	0.00660431	1.16437	0.210399	0.00307682	0.223248	0.0016593
100	10023821978	D42043	RFTN1	4.64208	0.0112402	0.0149694	0.864775	0.00068891	0.000795782	0.865966	0.00642002	0.00180686	0.900941	-0.231974	0.00135881	-0.255017	0.000412622
101	10023822130	NM_009590	AOC2	3.55773	0.0162774	0.025447	1.27886	0.0252787	0.0130431	1.20123	0.0036816	0.0016278	1.2373	0.19119	0.00840528	0.19658	0.00670608
102	10023822517	NM_004495	NRG1	2.70668	0.00422263	0.00763291	0.912762	0.000294864	0.000681043	0.906781	0.0183901	0.0133281	0.93906	-0.234548	0.000936462	-0.186371	0.0089106
103	10023822797	NM_004245	TGM5	2.2149	0.000280917	0.000876009	1.7263	0.0105633	0.0100206	1.38977	0.00298911	0.00479621	1.39988	0.244704	0.000546942	0.22764	0.00133286
104	10023822889	Contig65300_RC		3.09029	0.0284268	0.0227796	1.29627	0.00251454	0.00203729	1.30006	0.0158537	0.00045234	1.23813	0.19601	0.00657681	0.294285	3.59184e-05
105	10023822906	Contig9824_RC		2.52589	0.00594419	0.00958979	0.918377	0.00128275	0.00250191	0.912731	0.0137918	0.0293728	0.937976	-0.233421	0.000992657	-0.193184	0.00667012
106	10023823369	Contig45532_RC		2.28807	0.00262195	0.00640875	1.4013	0.0022499	0.00487256	1.3142	0.000989556	0.00166893	1.28633	0.249342	0.000424612	0.26444	0.000180121
107	10023823547	Contig52681_RC	UBE2QL1	2.9379	0.000622153	0.000876009	1.61688	0.000176072	0.000143349	1.54274	0.000207007	8.51154e-05	1.52738	0.217618	0.00212715	0.242083	0.00060962
108	10023823651	NM_002349	LY75	2.67204	0.0371372	0.0305092	1.24863	0.00182915	0.00132686	1.28479	0.0933151	0.0180506	1.15265	0.186593	0.00865489	0.204395	0.00396368
109	10023823681	NM_005012	ROR1	3.15806	0.00222951	0.00319207	1.32971	0.0244291	0.0187054	1.17626	0.0144457	0.0130615	1.16687	0.242542	0.00070004	0.19329	0.00722715
110	10023823751	Contig51690_RC		2.26403	0.009031	0.00372303	0.609787	0.0254932	0.00998348	0.713214	0.0242981	0.00732499	0.752378	-0.194659	0.00612415	-0.229158	0.00119895
111	10023823799	AA485939_RC		2.45137	0.000124633	0.00025475	0.903042	0.00181878	0.00277203	0.929668	0.0387294	0.0463368	0.958206	-0.21807	0.00208105	-0.197944	0.00529949
112	10023823918	NM_003311	PHLDA2	3.78017	0.00321495	0.00484705	1.50937	0.00221837	0.00268936	1.44363	0.000524163	0.000710845	1.41044	0.246115	0.000685319	0.257808	0.000367711
113	10023824061	NM_003273	TM7SF2	3.48899	0.00353015	0.00372303	0.740291	0.00155413	0.00106621	0.765768	0.00140423	0.000767708	0.796043	-0.248128	0.00043873	-0.272355	0.00010803
114	10023824148	NM_002957	RXRA	3.50482	0.0614148	0.0790958	0.882429	0.00328404	0.00858021	0.867103	0.0043968	0.0105395	0.880659	-0.207638	0.00341408	-0.201319	0.00455728
115	10023824153	NM_016529	ATP8A2	1.75113	0.0505896	0.171343	0.769399	0.00493318	0.0248349	0.748896	0.00306964	0.00747734	0.769039	-0.183253	0.00994981	-0.184295	0.00952828
116	10023824347	Contig22095_RC	WHSC2	2.32288	8.13603e-05	0.000108421	0.7056	0.00314718	0.00258911	0.806324	0.00118858	0.00116634	0.812436	-0.23815	0.000751838	-0.245496	0.000506788
117	10023824375	NM_005886	KATNB1	3.70273	0.0188385	0.0489086	0.78455	0.000526845	0.00217909	0.760712	0.00025177	0.000712156	0.783418	-0.234659	0.000931075	-0.207812	0.00346976
118	10023824478	NM_000950	PRRG1	3.49857	0.00405264	0.00505179	1.2181	7.92146e-05	0.000149488	1.22591	7.30157e-05	0.000123084	1.20956	0.253434	0.000338286	0.264373	0.000180829
119	10023824583	NM_017572	MKNK2	4.28706	0.00317133	0.00419033	0.775897	0.000135541	0.00022912	0.796376	0.00309235	0.00194055	0.845613	-0.280146	0.000215533	-0.271831	0.000335969
120	10023824966	AL122077	DNAH17	2.45263	0.0120459	0.00856149	0.825344	0.00242585	0.00296664	0.819753	0.000869155	0.00138032	0.81881	-0.20041	0.00474744	-0.214135	0.00251502
121	10023825181	Contig16712_RC	SMTNL2	2.07174	0.00168979	0.000761569	0.769397	0.00652504	0.00076282	0.832405	0.0116338	0.00205934	0.863673	-0.223222	0.00166145	-0.285689	4.92853e-05
122	10023825416	NM_018204	CKAP2	3.03713	0.103689	0.142945	1.15475	0.000814795	0.001477	1.26875	0.00309759	0.00249976	1.22333	0.191152	0.00727901	0.189111	0.00793983
123	10023826577	NM_003394	WNT10B	2.87865	0.00405347	0.00239307	0.891292	0.00174779	0.0019626	0.906082	0.0531883	0.0173895	0.945001	-0.199471	0.0050637	-0.203916	0.00414719
124	10023826637	NM_003786	ABCC3	3.58338	0.00916743	0.0184011	1.6054	0.00706571	0.0202984	1.43989	0.000899553	0.00233173	1.47113	0.268151	0.000144734	0.246929	0.000484693
125	10023826728	NM_001769	CD9	4.74327	0.00911426	0.0119822	1.43631	0.00538242	0.00645983	1.35191	0.0116035	0.00885886	1.26734	0.220548	0.00194683	0.20339	0.00434738
126	10023826773	NM_017700		2.92261	0.0348478	0.0611548	0.940813	0.000717282	0.00132299	0.924297	0.0317571	0.0127212	0.951742	-0.189573	0.0081107	-0.190537	0.00778756
127	10023826913	Contig44431_RC		2.59468	0.000845373	0.00151205	1.34151	0.000104249	0.000288248	1.31131	0.000183821	0.000319958	1.27356	0.211615	0.00290657	0.229809	0.00119435
128	10023826931	NM_000111	SLC26A3	2.31971	0.000217497	0.000709713	0.895662	0.000216544	0.00106621	0.916009	0.00196976	0.000767708	0.933684	-0.20521	0.00381843	-0.256774	0.000270189
129	10023826947	AK000933	CHML	2.72212	0.00621098	0.00906265	1.25382	0.00030309	0.000366211	1.2573	0.0108535	0.00404382	1.17354	0.192045	0.00686063	0.200346	0.00476109
130	10023827347	NM_016359	NUSAP1	2.61024	0.033601	0.0426013	1.31881	0.00431836	0.00609511	1.32205	0.021833	0.00763249	1.23842	0.216192	0.00227882	0.232101	0.00103111
131	10023827355	Contig48800_RC		3.5574	0.00797808	0.00372303	1.27186	0.0080269	0.00884587	1.22462	0.00358069	0.00303334	1.2232	0.201402	0.00454028	0.187456	0.00834579
132	10023827459	NM_002889	RARRES2	4.32945	0.0221315	0.0397846	0.769902	0.0109178	0.0246825	0.798786	0.00384885	0.00441301	0.798063	-0.217884	0.0028887	-0.213261	0.00356135
133	10023827653	Contig39691_RC	SASS6	2.34301	0.00672311	0.00679565	1.27757	0.000337839	0.000463545	1.28898	0.015417	0.0114052	1.16701	0.198529	0.00516371	0.185321	0.00912919
134	10023827680	AB011542	MEGF9	2.85276	0.00493205	0.00679565	1.58154	0.0183846	0.0103318	1.37374	0.011252	0.00735253	1.32995	0.230491	0.00115364	0.228364	0.00128505
135	10023827681	Contig30522_RC		2.70962	9.0003e-06	7.86781e-05	1.42383	0.000747979	0.000412166	1.28343	0.00482237	0.00116634	1.20683	0.242702	0.000589657	0.248911	0.000420174
136	10023827736	Contig38614_RC		1.8923	0.000915587	0.00161624	1.37788	0.00106591	0.00176597	1.29136	0.00717062	0.00674313	1.21075	0.232157	0.00102812	0.23276	0.000996608
137	10023827829	Contig46007	KCNA1	2.26926	0.0020541	0.00308704	1.44098	0.00100589	0.00241733	1.38647	0.00262296	0.00460613	1.29887	0.264171	0.000176079	0.238896	0.000722716
138	10023828102	NM_012290	TLK1	3.89729	0.0138917	0.0406581	1.2088	0.000194252	0.000681043	1.26236	0.000479221	0.00128454	1.20811	0.244448	0.000536524	0.225473	0.00144428
139	10023828250	ENST00000219837	C16orf88	2.98845	0.0217354	0.0263086	0.933408	0.00147748	0.00182939	0.928266	0.0165045	0.015532	0.947724	-0.220755	0.00182528	-0.191932	0.00689416
140	10023828786	NM_001348	DAPK3	3.45877	0.119707	0.159515	0.885024	0.00625819	0.0112497	0.84763	0.00170505	0.00354451	0.852919	-0.2054	0.00387628	-0.188989	0.00798097
141	10023829345	Contig39594_RC	NRXN3	2.58375	1.66893e-06	7.7486e-06	1.48543	1.60933e-06	5.60284e-06	1.40029	0.000280917	2.61068e-05	1.31585	0.257356	0.000261359	0.304575	1.3518e-05
142	10023829638	NM_030769	NPL	2.85793	0.0402594	0.0535347	1.3384	0.00140804	0.00258911	1.41911	0.0297499	0.00660431	1.27232	0.184176	0.00957593	0.224485	0.00151746
143	10023829682	M24355	FLG	2.47523	0.00107366	0.00239307	0.922289	0.000210047	0.000255346	0.925797	0.00699085	0.000538766	0.945652	-0.223509	0.0015931	-0.256988	0.000266906
144	10023829856	ENST00000299831	SHISA6	2.34991	0.0311442	0.0758386	0.923133	0.00200284	0.00998348	0.893277	0.0192746	0.0205407	0.926609	-0.188118	0.00828012	-0.20445	0.00404767
145	10023829923	AK022352		2.70843	0.0283364	0.0214483	0.921524	0.00760835	0.0109802	0.919372	0.00575894	0.00429821	0.92772	-0.235544	0.000889262	-0.229722	0.00119968
146	10023829980	Contig45859_RC	CAV2	4.66023	0.00471443	0.00271988	1.25709	0.00988036	0.0064919	1.19887	0.00813156	0.008802	1.17233	0.193753	0.00637108	0.195938	0.00579036
147	10023830175	AK057539		2.42037	0.0685285	0.00128192	0.893194	0.0250149	0.000216961	0.906889	0.00814146	0.000238538	0.909558	-0.22445	0.00156338	-0.239531	0.000721312
148	10023830674	Contig40478_RC	GK	2.42818	0.0114037	0.00906265	1.30622	0.00461203	0.00609511	1.25842	0.11871	0.0241786	1.14263	0.188859	0.00786401	0.189307	0.00771557
149	10023831148	X78938		2.46025	0.0546972	0.0535347	0.953432	0.0021292	0.00217909	0.936976	0.0139986	0.0109648	0.953271	-0.18985	0.00769452	-0.191318	0.00722757
150	10023831928	NM_022144	TNMD	4.47998	0.00173473	0.00396007	1.5522	0.00631678	0.0134167	1.36411	0.000442922	0.000913382	1.42374	0.215001	0.00247626	0.212314	0.00281249
151	10023831982	ENST00000222983	AZGP1P1	2.57948	0.00362963	0.00224352	0.769297	0.00070715	0.000655591	0.785008	0.00079149	0.00105822	0.803805	-0.262663	0.000199796	-0.264434	0.000180188
152	10023832271	U84511		2.75487	0.00979388	0.0413504	0.924324	0.000828445	0.00381535	0.907133	0.00217521	0.00980979	0.926512	-0.247004	0.000499275	-0.194982	0.00630399
153	10023832412	NM_052831	C6orf192	3.53841	0.0100803	0.0264188	1.17993	0.000666797	0.00280434	1.2061	0.0275745	0.00941902	1.12882	0.196121	0.00587037	0.225872	0.00145648
154	10023832461	AK057907		2.36179	0.000788987	0.00207001	1.55774	0.000154018	0.000314534	1.52976	0.00695598	0.00735253	1.32392	0.24228	0.000623144	0.208951	0.00329157
155	10023832484	ENST00000296502		2.75315	0.00481701	0.00504303	0.913849	0.000482142	0.000886321	0.908904	0.0244349	0.0155494	0.940857	-0.205854	0.00407812	-0.19914	0.00549582
156	10023832541	NM_058237	PPP4R4	1.85416	0.00149864	0.00141406	1.44778	6.70552e-05	4.071e-05	1.38796	8.10027e-05	6.75917e-05	1.32984	0.320994	4.75596e-06	0.298089	2.31168e-05
157	10023832667	S69136		2.57371	0.00745124	0.0107268	0.908431	0.000178039	0.000245214	0.894111	0.0095228	0.00122356	0.927764	-0.186314	0.00893196	-0.210055	0.00312669
158	10023832888	L37700		2.39425	0.024226	0.0369963	0.951998	0.00024581	0.000396252	0.941896	0.0171687	0.00845254	0.964753	-0.211401	0.00286325	-0.233772	0.000945716
159	10023832973	NM_003541	HIST1H4K	2.79215	0.0254668	0.019385	0.888504	0.00148964	0.00189495	0.875488	0.00528032	0.00290012	0.899162	-0.213532	0.00258834	-0.233831	0.00094283
160	10023833013	NM_022823	FNDC4	3.75655	0.00878167	0.00781411	1.21396	0.0138397	0.0120207	1.16231	0.00386727	0.00286955	1.1582	0.192505	0.00686835	0.19515	0.00612473
161	10023833348	Contig47835_RC	TMEM88	3.08201	7.74264e-05	0.000173748	0.807433	5.13792e-05	0.000187635	0.828106	0.00725228	0.00610954	0.886955	-0.260376	0.000274977	-0.241342	0.000769948
162	10023833688	Contig2439_RC	ADAM12	3.20393	0.00359535	0.00372303	1.36266	0.00183612	0.00217909	1.28388	0.000263393	0.000346363	1.28354	0.245503	0.00050659	0.274237	9.63382e-05
163	10023833811	NM_031423	NUF2	2.20509	0.00479341	0.00640875	1.37072	0.00444549	0.00356567	1.27587	0.0681345	0.00885886	1.16104	0.213288	0.00268608	0.20982	0.00316115
164	10023834587	NM_023016	ANKRD57	2.75272	0.0140235	0.018275	1.17477	0.00193053	0.00333095	1.1772	0.0222743	0.00832862	1.13695	0.184896	0.00947592	0.210595	0.0030489
165	10023834706	ENST00000296361		2.83907	0.019963	0.0535347	0.930454	0.00266844	0.00554079	0.92788	0.00831038	0.0105395	0.939134	-0.199295	0.00533762	-0.211492	0.00307381
166	10023835190	Contig50939_RC	MAP4K5	3.37772	0.00677681	0.00906265	1.21707	0.000630915	0.00105834	1.23954	0.00789076	0.00384754	1.17189	0.197485	0.00552892	0.205779	0.00380965
167	10023835351	NM_022346	NCAPG	2.06536	0.00381637	0.015707	1.26275	0.00240231	0.0093993	1.20026	0.0166745	0.0105395	1.15314	0.196487	0.00565232	0.216948	0.00219728
168	10023835427	NM_025084		2.7985	0.000200331	0.000428915	0.831578	0.000279605	0.00099045	0.871403	0.0468865	0.033156	0.927918	-0.220436	0.00185409	-0.190403	0.00736248
169	10023835538	NM_022034	CUZD1	2.17176	0.0011431	0.00196976	1.21854	0.000603259	0.00147814	1.17625	0.0045417	0.00717545	1.14151	0.221732	0.0017396	0.213758	0.00256069
170	10023835852	M12025	IGLV2-14	2.37835	0.000783801	0.00288248	0.817573	0.00574619	0.000781357	0.860954	0.0330286	0.00402236	0.905583	-0.210872	0.00300953	-0.215495	0.00241848
171	10023836095	NM_025245	PBX4	3.08158	0.0254728	0.0574334	1.22092	0.001845	0.00401825	1.22438	0.00606495	0.00125343	1.1906	0.210634	0.00336201	0.19525	0.00664817
172	10023836231	AF116653	FYB	3.33665	0.0166491	0.0276495	1.3234	0.00338101	0.00456655	1.29543	0.0145791	0.00570238	1.23219	0.197361	0.00543815	0.235458	0.000866188
173	10023836401	NM_030572	C12orf39	2.10447	0.00453323	0.00856149	0.62637	0.00226849	0.00277203	0.663355	0.00118709	0.00105822	0.695056	-0.237969	0.000759055	-0.259352	0.00023306
174	10023836772	ENST00000291084	OR2A14	2.95577	0.0185616	0.0292575	0.912004	0.00101	0.00252605	0.904071	0.00339544	0.00479621	0.924369	-0.228158	0.00133669	-0.209141	0.00334374
175	10023837042	NM_138339	GPR26	2.8383	0.0205821	0.0433082	0.930477	0.00260747	0.0126446	0.9288	0.00910544	0.00979614	0.938466	-0.189166	0.00877071	-0.22154	0.00206993
176	10023837561	AK055562		2.67138	0.00969607	0.0184011	0.943208	0.00246423	0.00735587	0.941113	0.00723487	0.00460613	0.949949	-0.221604	0.00175062	-0.204656	0.00391661
177	10023837697	ENST00000244032	ZNF831	2.37541	0.00423938	0.00475597	0.924351	0.00432056	0.00158763	0.927583	0.00915587	0.00422394	0.941908	-0.243232	0.000573042	-0.228791	0.00122152
178	10023838928	ENST00000299128		4.0662	0.0393937	0.0406581	0.742216	0.00189584	0.00182939	0.724544	0.00246948	0.000848055	0.764809	-0.226123	0.00139792	-0.207777	0.00339207
179	10023839258	ENST00000301456	KANK3	3.08382	0.00360429	0.00255168	0.851442	0.000341654	0.000176609	0.851978	0.000915945	0.000225842	0.87318	-0.234679	0.000902133	-0.280329	6.61123e-05
180	10023840481	NM_057179	TWIST2	4.10563	0.0129049	0.0311605	0.83627	0.000568509	0.00187999	0.828197	0.000534713	0.000333607	0.826961	-0.254845	0.000480944	-0.281346	0.000109371
181	10023840559	AL080120	ODZ4	3.71932	0.00267232	0.0018447	1.4408	0.00255048	0.00387627	1.333	0.000382662	0.000694454	1.32553	0.238736	0.00072888	0.240532	0.000662435
182	10023840609	AJ008200	IGHV1-69	2.5172	0.00737208	0.0101441	0.917549	0.000641882	0.00106621	0.908985	0.010573	0.00558305	0.93095	-0.198819	0.00509729	-0.206076	0.00366956
183	10023841134	AK057242		2.59099	0.0108352	0.0263086	0.914623	0.00034821	0.000607431	0.905291	0.0346032	0.00862569	0.942645	-0.184658	0.00938561	-0.20495	0.0038642
184	10023841473	AF103669		2.53123	0.00039947	0.000202656	0.824811	0.0193804	0.000886142	0.880113	0.0503113	0.00395644	0.913231	-0.186064	0.00884938	-0.210741	0.00295356
185	10023841589	AK026181	PHLDA1	3.1098	0.00379115	0.00781411	1.37664	0.000883996	0.00227326	1.31418	0.00404805	0.00102955	1.24961	0.221187	0.00188723	0.24468	0.000566116
186	10023841679	Contig37281_RC	NFE2L3	2.42364	0.0144027	0.0352732	1.20023	0.00325775	0.0064919	1.17715	0.00922829	0.00501943	1.15888	0.205107	0.00392837	0.211611	0.00290703
187	10023841856	NM_032817	ITIH5	3.91705	0.00137681	0.00224352	1.34954	0.00108796	0.00164515	1.27712	0.00212926	0.00441128	1.21688	0.2174	0.00220725	0.224011	0.00159783
188	10023843190	ENST00000297544		4.42425	0.0948942	0.122946	0.89635	0.0239935	0.0438618	0.884809	0.00263292	0.00570095	0.866147	-0.193907	0.00660387	-0.203954	0.00423815
189	10023843687	NM_002060	GJA4	4.28839	0.00665879	0.00644922	0.785806	0.0174057	0.0242934	0.846923	0.0222582	0.0308563	0.870439	-0.194376	0.0080202	-0.202529	0.00569704
190	10023843837	NM_032389	ARFGAP2	3.98935	0.15616	0.105222	0.93741	0.00534385	0.00276804	0.906131	0.0246467	0.0167117	0.926417	-0.196095	0.00715061	-0.212744	0.00346388
191	10023843852	AK023199	C1orf226	3.03662	0.0439146	0.0726919	0.811919	0.00342149	0.0064919	0.779671	0.00707036	0.00362366	0.805241	-0.204658	0.00400957	-0.221871	0.00177577
192	10023844001	AK057822		2.5107	0.00957012	0.0126574	0.905255	0.000415742	0.000562549	0.890696	0.0408119	0.00470644	0.928836	-0.202583	0.0043042	-0.244369	0.000538842
193	10023844207	NM_032020	FUCA2	4.1573	0.0026536	0.00425386	1.1677	0.00355267	0.00512749	1.12993	0.00974333	0.0110757	1.10402	0.206976	0.00481701	0.196532	0.00749865
194	10023844719	NM_032181	FAM176A	3.25471	0.000686526	0.000816941	0.875451	3.26037e-05	2.96235e-05	0.876413	0.00519329	0.000712156	0.918429	-0.197093	0.005503	-0.221306	0.00177652
195	10023844864	NM_032148	SLC41A2	2.74415	0.0254837	0.0352732	1.15287	0.00598377	0.0126566	1.16042	0.00486773	0.00570238	1.14559	0.199127	0.00502795	0.202582	0.00430452
196	10023845021	AK055250		3.86094	0.0533217	0.0832649	0.715963	0.00224382	0.00268936	0.68611	0.00410783	0.00100112	0.737193	-0.221621	0.00200611	-0.196402	0.00632776
197	10023845600	NM_138434	C7orf29	3.2368	0.0229272	0.0292575	0.826975	0.000975192	0.00105834	0.81512	0.00714445	0.00867885	0.867408	-0.200405	0.00496865	-0.20247	0.00453097
198	10023845927	NM_002566	P2RY11	3.38626	0.00753617	0.00496733	0.862947	0.000953257	0.000758767	0.869863	0.0063777	0.00327963	0.897196	-0.203871	0.00513159	-0.232805	0.00134415
199	10023845992	Z22679	TRGC2	2.14633	0.0015893	0.00349885	0.916166	0.0214161	0.0134167	0.941734	0.0582092	0.0241786	0.955704	-0.191478	0.00703026	-0.190217	0.00742135
200	10023846488	NM_030786	SYNC	3.34402	0.0233802	0.0400302	1.1737	0.0144274	0.0147502	1.15459	0.00278539	0.00425839	1.18722	0.199639	0.0058844	0.227528	0.00164028
201	10023846520	NM_031941	USHBP1	2.54094	0.0288405	0.0369963	0.894805	0.00223184	0.00267917	0.873029	0.020106	0.00688458	0.906559	-0.192392	0.00690183	-0.237626	0.000797537
202	10023847268	Z83943		2.44402	0.0278105	0.1903	0.949931	0.00145543	0.00691176	0.939802	0.0076282	0.0116313	0.950728	-0.202405	0.00433907	-0.188296	0.00805409
203	10023848015	AL713674	FAR1	3.5535	0.0022968	0.00569391	1.25227	1.22786e-05	4.65512e-05	1.29881	0.000256896	0.000643849	1.22244	0.231481	0.00106458	0.207899	0.00337297
204	10023848629	AK021561		2.79996	0.0221327	0.0263086	0.925231	0.000816524	0.00164515	0.896729	0.0112293	0.00646806	0.927277	-0.206465	0.00369167	-0.203951	0.00414059
205	10023849154	NM_080625	C20orf160	3.11952	0.000551462	0.00115412	0.807782	0.00139755	0.00158763	0.844117	0.0116161	0.00346702	0.881825	-0.231395	0.00106927	-0.247422	0.000456097
206	10023849818	Z46619		2.58003	0.000469148	0.00025475	0.90045	0.000225723	0.00030005	0.909015	0.0258189	0.00546592	0.943536	-0.218772	0.00201124	-0.23342	0.000963166
207	10023849839	AK022869	RPS6KA3	3.19128	0.00266129	0.00344825	1.20354	0.000214458	0.000318587	1.20564	0.0016011	0.00074631	1.17789	0.196005	0.00717757	0.237086	0.00108664
208	10023850418	NM_130808	CPNE4	2.01319	0.0015046	0.00193518	0.657505	0.00026083	0.000383258	0.66623	0.00300908	0.00147486	0.737973	-0.234732	0.000956406	-0.250307	0.000416778
209	10023850714	NM_032609	COX4I2	2.63835	0.0105821	0.0226175	0.855371	0.000349641	0.00099045	0.830264	0.00176728	0.00170869	0.862262	-0.268726	0.000134418	-0.246072	0.000491126
210	10023850826	NM_031413	CECR2	1.99541	0.00250471	0.000370264	0.697531	0.00479913	0.00258911	0.789307	0.00333035	0.000272691	0.812496	-0.23149	0.00106409	-0.265811	0.000159853
211	10023850947	RSE_00000220256		2.24874	0.00747377	0.0126574	0.927622	0.000233293	0.000338256	0.913911	0.00198662	0.00205934	0.928919	-0.222542	0.00167139	-0.24273	0.000588768
212	10025902251	NM_152455	ZSCAN29	2.365	0.032878	0.066718	0.940719	0.00532746	0.00884587	0.933182	0.00817537	0.0149529	0.941549	-0.21252	0.00271573	-0.191305	0.0070827
213	10025902336	NM_182584		2.78381	0.00926363	0.015707	0.915081	0.00137186	0.00210464	0.912649	0.0200981	0.00512785	0.93558	-0.190658	0.00728236	-0.188929	0.00784058
214	10025902419	NM_000750	CHRNB4	2.82313	0.0549271	0.0790958	0.954764	0.000426054	0.000584602	0.932104	0.00556415	0.00422394	0.950406	-0.185711	0.00952717	-0.195206	0.00637913
215	10025902426	NM_182682	UBE2G1	2.70522	0.00305438	0.00372303	0.908459	0.000557661	0.00114733	0.909949	0.00491297	0.00702864	0.933238	-0.221529	0.00175714	-0.204925	0.00386864
216	10025902550	NM_153486	LDHD	3.27212	0.00730979	0.0184011	0.866866	0.000485361	0.00299674	0.855435	0.0124102	0.00897867	0.895999	-0.201953	0.00544806	-0.209429	0.00392094
217	10025902562	NM_138332	C21orf41	1.89631	0.0169537	0.0283806	0.878118	0.00624895	0.0145288	0.880576	0.00364363	0.00748217	0.892394	-0.200152	0.00525729	-0.188343	0.00871439
218	10025902584	NM_033316	MFI2	2.67288	0.000192881	0.000661135	1.63154	0.000111699	0.000312269	1.51129	0.0004493	0.00131577	1.37438	0.277089	8.08567e-05	0.267486	0.000144737
219	10025902707	NM_021779	ADAM29	2.47063	0.0612245	0.0446227	0.96036	0.00283819	0.0019626	0.941976	0.00226891	0.00155479	0.941747	-0.191637	0.00712919	-0.232864	0.0010216
220	10025902715	NM_173830	C6orf182	2.70361	0.0185812	0.0276495	1.14174	0.000738323	0.00127965	1.20222	0.00213075	0.00646806	1.16233	0.209069	0.00319426	0.201204	0.00458086
221	10025902755	NM_173357	SSX6	3.00023	0.0194992	0.0352732	0.941289	0.000230312	0.00099045	0.919624	0.00224936	0.000596702	0.93655	-0.18833	0.00820643	-0.204279	0.00407935
222	10025902776	NM_182740	PKD1L2	3.45532	0.0059889	0.00888783	0.675149	0.00326014	0.00693101	0.729316	0.00294477	0.00481194	0.760432	-0.209047	0.00389148	-0.205164	0.0046255
223	10025902833	NM_016281	TAOK3	2.96374	0.00119096	0.00196976	1.20996	0.000490308	0.000607431	1.19636	0.000997603	0.000287652	1.17255	0.231193	0.00108046	0.248772	0.000423412
224	10025902874	NM_181608	KRTAP19-2	2.77368	0.0199366	0.0290491	0.83314	0.000461817	0.000792086	0.810955	0.000188112	0.000238419	0.830891	-0.263189	0.000186508	-0.249279	0.000411707
225	10025902947	NM_001813	CENPE	2.34987	0.0564302	0.0375257	1.22789	0.00405759	0.00526744	1.29167	0.00144637	0.00213993	1.30005	0.230108	0.00121147	0.234107	0.000987688
226	10025902960	NM_006268	DPF2	4.03318	0.00928146	0.00505179	0.827708	0.00115859	0.000734568	0.83109	0.0049997	0.00431669	0.866356	-0.212868	0.00273992	-0.2037	0.0041879
227	10025903020	NM_172128	CAMK2D	3.77952	0.00205845	0.000661135	1.17744	2.92659e-05	1.53184e-05	1.21842	0.000855744	0.000313044	1.15742	0.234779	0.000954082	0.249147	0.000444184
228	10025903036	NM_033150	COL2A1	2.25027	0.000109553	0.000236154	0.889039	0.00101286	0.000734568	0.913573	0.015495	0.00916427	0.942447	-0.218341	0.00205381	-0.250734	0.000379758
229	10025903042	NM_032037	TSSK6	2.45952	0.0447934	0.101101	0.945573	0.00119418	0.00267917	0.927166	0.00497091	0.00460613	0.936006	-0.209387	0.00314712	-0.217456	0.00214397
230	10025903046	NM_032051	PATZ1	3.0534	0.0729908	0.17383	0.892376	0.00207549	0.00315285	0.860948	0.00596404	0.00694025	0.882846	-0.196763	0.00609491	-0.212587	0.00299576
231	10025903056	NM_006693	CPSF4	3.84814	0.0234137	0.0292575	0.910444	0.00105858	0.00261587	0.8896	0.00616908	0.0035184	0.904527	-0.191023	0.00811909	-0.204918	0.00445974
232	10025903075	NM_004748	CCPG1	3.81899	0.0265351	0.0399643	1.21918	0.000391006	0.000504673	1.29389	0.000685334	0.00211567	1.24452	0.246134	0.00083781	0.19967	0.00704166
233	10025903087	NM_021006	CCL3L1	2.89323	0.00397712	0.00856149	0.886291	6.44922e-05	0.000148356	0.871978	0.00612605	0.00244254	0.912108	-0.236823	0.000831831	-0.20769	0.00348935
234	10025903142	NM_003260	TLE2	3.44106	0.0679489	0.0638865	0.833802	0.00857419	0.00629073	0.812745	0.00240838	0.00264966	0.819696	-0.193352	0.00648305	-0.211662	0.00282822
235	10025903167	NM_004059	CCBL1	2.95304	0.0138746	0.0340061	0.901924	0.000337958	0.00117689	0.888194	0.00651354	0.00363988	0.915423	-0.214434	0.00289373	-0.23035	0.00134674
236	10025903307	NM_178495	ITPRIPL1	2.61947	0.0574226	0.0726919	0.931114	0.00154644	0.00147814	0.907964	0.00275916	0.00441128	0.920812	-0.207513	0.00343394	-0.204021	0.00403186
237	10025903317	NM_139274	ACSS2	4.21865	0.00371712	0.00604182	0.779097	0.000559032	0.0009197	0.796838	0.000843525	0.00113839	0.820116	-0.236804	0.000807156	-0.233143	0.000977052
238	10025903334	NM_182511	CBLN2	2.10547	0.000743926	0.000428915	0.686125	0.0947719	0.0139499	0.844181	0.0545107	0.0143059	0.847531	-0.200207	0.00501252	-0.231704	0.00111713
239	10025903407	NM_002445	MSR1	3.57051	0.00859106	0.00856149	1.66745	0.00175238	0.00225604	1.56151	0.00158697	0.000197113	1.5508	0.235099	0.000882592	0.300795	1.74795e-05
240	10025903449	NM_005682	GPR56	3.55318	0.000890315	0.00212395	0.779356	0.00028342	0.000713706	0.786322	0.00728518	0.00622714	0.83597	-0.213747	0.00331009	-0.192445	0.00832226
241	10025903541	NM_005118	TNFSF15	2.24733	0.0266265	0.0535347	1.22597	0.00631911	0.00998348	1.21247	0.0181292	0.0135875	1.16478	0.236883	0.000803809	0.241639	0.000624336
242	10025903585	NM_002922	RGS1	3.04877	0.00188732	0.00396007	2.48278	0.000327826	0.000644147	2.19987	0.0042398	0.000979602	1.8174	0.269628	0.000132552	0.30632	1.26271e-05
243	10025903808	NM_145262	GLYCTK	3.0526	0.00465566	0.00349885	0.840701	0.00125593	0.00132686	0.850477	0.0105872	0.00480878	0.891037	-0.208584	0.00326724	-0.196874	0.00555659
244	10025903844	NM_004845	PCYT1B	2.6255	0.0617118	0.122946	0.947975	0.00466651	0.0105998	0.930651	0.00254899	0.00128454	0.928827	-0.200351	0.00486901	-0.205826	0.00380144
245	10025903895	NM_012170	FBXO22	2.35248	0.00408924	0.00569391	0.893039	0.00040406	0.00030005	0.894179	0.00665599	0.000983357	0.920013	-0.187397	0.0083666	-0.240617	0.000659443
246	10025903933	NM_003566	EEA1	2.64343	0.00504875	0.00604182	1.205	7.85589e-05	0.000149488	1.2536	0.000100017	0.000116348	1.21945	0.245708	0.00050097	0.259133	0.000236019
247	10025903984	NM_031362	COL4A3	2.17969	0.000629246	0.00100625	2.22965	0.000224054	0.000255346	1.95336	5.39422e-05	5.3525e-05	1.87933	0.307736	1.08743e-05	0.310484	8.98121e-06
248	10025904031	NM_004276	CABP1	2.14641	0.00116789	0.00239307	0.861802	5.31077e-05	0.000169456	0.856541	0.00225735	3.74913e-05	0.869398	-0.194814	0.00608294	-0.253808	0.00031969
249	10025904202	NM_018280	C22orf26	2.88132	0.0181865	0.0305092	0.947002	0.000571907	0.000707328	0.936637	0.0148051	0.00582403	0.954295	-0.210638	0.00296802	-0.233686	0.000949925
250	10025904265	NM_014474	SMPDL3B	2.67655	0.00595301	0.0173126	0.9318	9.93609e-05	0.000452042	0.923309	0.00253719	0.00443226	0.93895	-0.231488	0.00112951	-0.209511	0.003287
251	10025904484	NM_005675	DGCR6	3.56064	0.0367769	0.0406581	0.820613	0.00108433	0.00142598	0.798908	0.000913739	0.000748754	0.82395	-0.245767	0.000499363	-0.227256	0.00132039
252	10025904541	NM_018098	ECT2	3.2353	0.0300588	0.0203409	1.15882	0.00176758	0.00220066	1.1837	0.00402409	0.00656509	1.15134	0.192252	0.00804292	0.224834	0.00186849
253	10025904567	NM_178836	PLD6	3.23166	0.0238188	0.0369963	0.803715	0.00824189	0.0119348	0.824359	0.00326335	0.00271034	0.811009	-0.222725	0.00165628	-0.224558	0.00151194
254	10025904695	NM_006726	LRBA	3.12624	0.00498188	0.00224352	1.1687	0.00421822	0.00286782	1.13671	0.00207865	0.00187647	1.12781	0.237761	0.00076745	0.245195	0.000515176
255	10025904765	NM_178545	TMEM52	2.59285	0.000595272	0.0018447	0.834331	0.000397146	0.00132686	0.866299	0.00060463	0.00105822	0.886371	-0.271198	0.000115866	-0.258921	0.000238926
256	10025904847	NM_152325	C13orf26	2.1214	0.00846827	0.0119822	1.32013	0.00598276	0.00158763	1.35268	0.00211263	0.000806987	1.32976	0.234419	0.000914449	0.267331	0.000146081
257	10025904864	NM_021205	RHOU	3.96373	0.00245309	0.00355059	1.26724	0.00159895	0.00579321	1.21328	0.00235558	0.00467545	1.17058	0.241226	0.000971331	0.202313	0.00588455
258	10025904888	NM_016546	C1RL	3.91914	0.0264786	0.0165637	1.18468	0.0232426	0.0227029	1.13614	0.0057925	0.00307256	1.14317	0.20041	0.00508138	0.231704	0.001151
259	10025904898	NM_018369	DEPDC1B	2.13974	0.0124452	0.0276495	1.3256	0.00217605	0.00519699	1.28514	0.00740349	0.00220704	1.22034	0.252907	0.000360935	0.243155	0.000614349
260	10025904900	NM_052874	STX1B	2.74834	0.0174809	0.0535347	0.93709	0.000171423	0.00026691	0.924894	0.0211288	0.00634438	0.952133	-0.203059	0.00431117	-0.199973	0.00495183
261	10025904969	NM_017432	PTOV1	3.48757	0.0179213	0.0369963	0.865983	0.000869036	0.00158763	0.859821	0.0133007	0.017067	0.903052	-0.246298	0.000485084	-0.205864	0.00370552
262	10025905063	NM_015216	PPIP5K2	3.41121	0.0214649	0.0179558	1.19942	0.000908434	0.000484347	1.22384	0.0212609	0.00582546	1.15111	0.202044	0.00494851	0.195888	0.00646898
263	10025905148	NM_004210	NEURL	4.21723	0.0460809	0.0585209	0.771973	0.00223208	0.00427806	0.746872	0.00192368	0.00180024	0.774948	-0.209193	0.00325468	-0.184304	0.0097112
264	10025905157	NM_014875	KIF14	2.31464	0.0129238	0.0204146	1.27419	0.00550294	0.00782543	1.23443	0.0125396	0.0111831	1.18171	0.221645	0.00174709	0.223725	0.00157607
265	10025905178	NM_001896	CSNK2A2	3.77499	0.011339	0.0250242	0.886719	0.00592488	0.0126566	0.898645	0.00165254	0.00420439	0.896126	-0.228012	0.00134653	-0.194513	0.00643342
266	10025905370	NM_181718	ASPHD1	2.08196	0.00518346	0.00640875	1.48837	0.0237383	0.052054	1.26792	0.0565151	0.0164378	1.20746	0.201669	0.00448588	0.220454	0.00185252
267	10025905582	NM_004523	KIF11	2.79476	0.011516	0.0214915	1.25249	0.00333357	0.00629073	1.22389	0.0273411	0.0125757	1.16042	0.205085	0.0038405	0.215967	0.0023037
268	10025905652	NM_182574	MAMSTR	2.66125	0.0380844	0.0511779	0.763165	0.00259519	0.00414014	0.743641	0.000577569	0.000827253	0.756655	-0.207105	0.00349932	-0.194027	0.00629544
269	10025905722	NM_178019	CATSPER3	2.46199	0.00583965	0.00451136	0.928008	0.0439814	0.0097177	0.948031	0.0666699	0.0274864	0.961458	-0.221085	0.00184562	-0.214076	0.00258762
270	10025905726	NM_018273	TMEM143	3.59634	0.00865287	0.0214915	0.881909	0.000719428	0.00217909	0.879684	0.0076254	0.00646806	0.905295	-0.195234	0.00597219	-0.186921	0.00853611
271	10025905757	NM_000259	MYO5A	3.06545	0.0131049	0.0101441	1.22978	0.00294012	0.00350899	1.21828	0.00658417	0.00116634	1.193	0.194357	0.00620568	0.263798	0.000179971
272	10025905791	NM_153251	ZDHHC20	3.86164	0.0512971	0.0824661	1.18045	0.000627637	0.000520766	1.2527	0.00292903	0.00220704	1.19408	0.206781	0.00355219	0.188796	0.00788492
273	10025905802	NM_012403	ANP32C	2.29887	0.0165775	0.0320318	0.930771	0.00294429	0.00691176	0.933831	0.0114098	0.0167498	0.949533	-0.219748	0.00191768	-0.197616	0.00537712
274	10025905877	NM_018328	MBD5	2.8484	0.000526965	0.000533402	0.868667	0.000285625	0.000301898	0.886157	0.00221628	0.00314313	0.919083	-0.300217	2.10883e-05	-0.252686	0.000378528
275	10025905911	NM_152730	C6orf170	2.20161	0.0169684	0.0126574	1.25367	0.00626606	0.00427806	1.22509	0.0205306	0.00512785	1.18244	0.201518	0.00462119	0.219475	0.00199639
276	10025905957	NM_032802		3.91781	0.02909	0.0305092	1.14561	0.00536382	0.00414014	1.14155	0.0300418	0.00310195	1.1093	0.197235	0.00546856	0.22557	0.00143731
277	10025906444	NM_006557	DMRT2	3.37233	0.00591207	0.00799203	0.689496	0.00575829	0.0112986	0.752691	0.000232339	0.000484169	0.720198	-0.24329	0.000934919	-0.249141	0.000694906
278	10025906632	NM_033315	RASL10B	2.92254	0.0020389	0.00569391	0.610825	0.0071429	0.0199615	0.731664	0.00746912	0.008802	0.760246	-0.216625	0.00223175	-0.214784	0.00243821
279	10025906683	NM_000828	GRIA3	2.46772	0.00192916	0.00255168	1.38813	0.0028981	0.00400621	1.28146	0.00565147	0.0128222	1.24102	0.214146	0.00251374	0.191311	0.00708103
280	10025906749	NM_007368	RASA3	2.41636	0.0178967	0.0133661	0.935446	0.00368577	0.00241733	0.942921	0.00277084	0.00317204	0.946522	-0.197407	0.00554795	-0.22054	0.00189539
281	10025906782	NM_182585	hCG_1817306	2.83736	0.031213	0.0369963	1.18522	0.000588596	0.000886142	1.21737	0.00102431	0.00151831	1.16968	0.237885	0.000762427	0.233379	0.000965206
282	10025906805	NM_053279	FAM167A	1.77773	0.00124371	0.00421083	1.28498	0.00102049	0.00362772	1.24118	0.000462115	0.00113839	1.24911	0.201922	0.00443488	0.238201	0.0007498
283	10025906821	NM_138350	THAP3	2.975	0.0176837	0.0226175	0.89055	0.00268126	0.00451064	0.881679	0.0117778	0.0100106	0.908399	-0.220701	0.00188062	-0.206043	0.0037639
284	10025906842	NM_152367	C1orf161	1.89137	0.0145092	0.00958979	1.59055	0.00815868	0.00317371	1.47454	0.0149906	0.010129	1.33409	0.211349	0.00287023	0.199703	0.00490015
285	10025906885	NM_007113	TCHH	2.68136	9.04202e-05	0.000319183	1.3849	2.0206e-05	6.92606e-05	1.2949	5.36442e-07	2.02656e-06	1.30224	0.246023	0.000492423	0.338511	1.14228e-06
286	10025906920	NM_006606	RBBP9	3.71732	0.00257462	0.00107783	1.15494	0.00122023	0.00099045	1.1314	0.0020299	0.00148267	1.10484	0.225299	0.00145693	0.240958	0.000647543
287	10025906993	NM_018084	CCDC88A	2.4649	0.00649291	0.00447589	1.14171	0.0147222	0.00427806	1.09996	0.0160841	0.00595176	1.09051	0.221437	0.00181402	0.242374	0.00062001
288	10025907083	NM_005145	GNG7	2.55274	0.000606418	0.000724852	0.763126	0.00193602	0.00381535	0.822536	0.00216299	0.0015226	0.83587	-0.21844	0.00209917	-0.226945	0.00138024
289	10025907201	NM_005942	MOCS1	4.14358	0.000256002	0.00141406	0.735181	0.000156164	0.000853658	0.788948	0.00554109	0.0111831	0.849305	-0.289426	3.70631e-05	-0.228454	0.00124264
290	10025907215	NM_002237	KCNG1	2.5246	0.00939483	0.00829059	1.24852	0.00341541	0.00235486	1.21293	0.000427485	0.000273466	1.2105	0.256925	0.000288126	0.258451	0.000264244
291	10025907222	NM_152495	CNIH3	3.00399	0.00560456	0.00640875	1.41964	0.00686038	0.0119348	1.3024	0.0164666	0.00362366	1.24826	0.205856	0.00370682	0.215537	0.00235172
292	10025907231	NM_024596	MCPH1	2.77169	0.00745583	0.00906265	0.874893	0.0862308	0.0572847	0.929447	0.0167239	0.0116313	0.911183	-0.198235	0.00523156	-0.19261	0.00669508
293	10025907246	NM_004256	SLC22A13	3.54356	0.0380501	0.0696523	0.692211	0.00121045	0.00306857	0.655973	0.00128245	0.00093621	0.696084	-0.218736	0.00201471	-0.198844	0.00509159
294	10025907540	NM_181054	HIF1A	3.91127	0.006908	0.00693393	1.22093	0.00145352	0.0026772	1.21806	0.00133288	0.00215393	1.19498	0.26171	0.000285741	0.249389	0.000557811
295	10025907570	NM_018114	DALRD3	2.5904	0.00298309	0.00536418	0.905006	0.00234783	0.00572032	0.916427	0.00467461	0.00973278	0.933037	-0.225429	0.00144748	-0.198902	0.00507861
296	10025907667	NM_020467	SMAGP	3.13251	0.0123441	0.0204146	0.890623	0.000913262	0.00456655	0.8817	0.00919342	0.0105395	0.91093	-0.183952	0.00966517	-0.189283	0.00772331
297	10025907906	NM_016161	A4GNT	3.17278	0.0915683	0.0523799	0.825437	0.00571293	0.00177097	0.798972	0.00337571	0.000931919	0.822475	-0.228485	0.00135362	-0.22631	0.00150859
298	10025907969	NM_138566	GLS2	4.0535	0.0302946	0.0225809	0.727443	0.00340575	0.00215948	0.736728	0.0110556	0.00523269	0.79057	-0.222032	0.00266428	-0.202423	0.00627979
299	10025908094	NM_004104	FASN	5.30682	0.000336885	0.0003438	0.500803	0.00185823	0.00414014	0.612872	0.0178214	0.0237486	0.722446	-0.226785	0.00139136	-0.215906	0.00237149
300	10025908098	NM_019084	CCNJ	2.22651	0.0164971	0.0352732	1.18836	0.004161	0.00317371	1.18933	0.0821391	0.0579867	1.1008	0.200749	0.00467563	0.204362	0.00396965
301	10025908102	NM_145649	GCNT2	3.14713	0.00801009	0.00763291	1.18958	0.00565487	0.00427806	1.17017	0.00650573	0.00362366	1.14993	0.206146	0.00374614	0.203349	0.00425505
302	10025908128	NM_016440	VRK3	3.13925	0.015725	0.0214915	0.903304	0.00133508	0.00250191	0.895625	0.00301093	0.00413299	0.909228	-0.23293	0.000987922	-0.204439	0.00395573
303	10025908144	NM_178566	ZDHHC21	2.02859	0.0148627	0.0113391	1.23194	0.000366151	0.000481904	1.2788	0.0028469	0.000913382	1.2246	0.220515	0.00184694	0.218644	0.0020238
304	10025908265	NM_080865	GPR62	2.6427	0.0291384	0.0790958	0.940296	0.000892222	0.00250191	0.932311	0.00828236	0.00607437	0.94939	-0.232766	0.000996297	-0.20644	0.00360851
305	10025908296	NM_178557	NAT8L	3.87688	0.00143027	0.00157767	0.714553	0.00113398	0.00114059	0.747155	0.0156304	0.00439388	0.814292	-0.192699	0.00681114	-0.238688	0.000754171
306	10025908309	NM_175853		2.63452	0.0133282	0.0276495	1.36393	0.00125229	0.00442016	1.37634	0.00868285	0.013073	1.26817	0.211018	0.00291538	0.185196	0.00917693
307	10025908336	NM_052847	GNG7	3.58163	0.0305362	0.0489086	0.815685	0.00614321	0.00968748	0.823124	0.0130182	0.0103325	0.846519	-0.189205	0.0077491	-0.22149	0.00176052
308	10025908430	NM_147193	GLIS1	2.90627	0.0118166	0.0214915	0.88551	0.00167799	0.00344646	0.887748	0.0187405	0.02467	0.921702	-0.209852	0.00315643	-0.197542	0.00551505
309	10025908436	NM_003868	FGF16	2.4477	0.00793362	0.00505179	0.940734	0.00372112	0.0029031	0.928426	0.0053128	0.00336367	0.937619	-0.216422	0.00231354	-0.240755	0.000675952
310	10025908532	NM_004080	DGKB	2.60873	0.0115463	0.0141097	0.945374	0.00466967	0.00554079	0.944398	0.0904628	0.068764	0.967298	-0.191794	0.00693529	-0.193606	0.00641198
311	10025908753	NM_021797	CHIA	3.30463	0.00396299	0.00604182	0.835344	0.000441432	0.00164515	0.843132	0.0223021	0.0225174	0.900384	-0.185361	0.00929434	-0.201016	0.00472634
312	10025908875	NM_080817	GPR82	2.45892	0.00711542	0.0174612	0.935616	0.000854731	0.00306857	0.935842	0.00129896	0.00354451	0.946345	-0.225741	0.00142502	-0.190794	0.00724014
313	10025908965	NM_080921	PTPRC	4.17692	0.0308958	0.0278069	1.29132	0.00709879	0.00481951	1.28652	0.0793843	0.0269986	1.17226	0.185552	0.00922064	0.204434	0.0040506
314	10025909028	NM_021096	CACNA1I	2.34637	0.0137247	0.0204146	0.932141	0.00014919	0.000143349	0.910797	0.000178754	0.000137687	0.919218	-0.255966	0.000282912	-0.253986	0.000316495
315	10025909113	NM_182538	SPNS3	4.0234	0.0527936	0.101006	0.737365	0.0022797	0.00466275	0.709099	0.00257397	0.00131661	0.746997	-0.212804	0.00274824	-0.200409	0.00485644
316	10025909129	NM_005816	CD96	2.4789	0.0732379	0.0859514	1.09627	0.00407612	0.0109205	1.12838	0.00010848	0.000319958	1.14148	0.236286	0.000829424	0.256193	0.000279292
317	10025909171	NM_004096	EIF4EBP2	4.84359	0.0589581	0.0611548	0.870497	0.0136108	0.00911886	0.877339	0.00800878	0.00512785	0.881401	-0.209926	0.00314554	-0.234795	0.000924531
318	10025909209	NM_032160	DSEL	3.71892	0.0007779	0.00187951	1.37432	0.000879586	0.00239509	1.31391	0.00036931	0.00117272	1.27326	0.234903	0.00117501	0.192885	0.00800126
319	10025909282	NM_013960	NRG1	2.57177	0.0101132	0.0238212	0.916472	0.00209963	0.00531882	0.920634	0.0137929	0.0145863	0.940862	-0.195235	0.00610212	-0.194815	0.00621466
320	10025909314	NM_015386	COG4	3.7173	0.176779	0.225253	0.944478	0.00266164	0.00387627	0.901159	0.0105447	0.0125757	0.924627	-0.194482	0.00658149	-0.20241	0.0046492
321	10025909356	NM_152447	LRFN5	2.84677	0.0241368	0.0290491	1.26016	0.011515	0.015059	1.23528	0.00287873	0.00303334	1.22813	0.186022	0.00886522	0.188059	0.00813541
322	10025909390	NM_182948	PRKACB	3.59094	0.0087319	0.00421083	1.20736	0.000267029	0.000199914	1.2424	0.0106366	0.00131577	1.16213	0.206757	0.00373104	0.2328	0.0010563
323	10025909432	NM_032779	CCDC142	2.86873	0.0131336	0.008793	0.872941	0.000484288	0.000324905	0.856222	0.00584567	0.00268257	0.89241	-0.186406	0.0092573	-0.221133	0.00194455
324	10025909438	NM_032597	MS4A14	2.91886	0.0103773	0.0113391	1.42387	0.00341296	0.001477	1.38799	0.00507086	0.00170714	1.33464	0.202517	0.00462714	0.238557	0.0008089
325	10025909533	NM_020432	PHTF2	3.84958	0.00713271	0.00505179	1.1992	0.000372171	0.000301898	1.2164	0.0170287	0.00193292	1.14122	0.19662	0.00574338	0.245509	0.0005236
326	10025909577	NM_006917	RXRG	2.83664	0.0266214	0.0344001	0.787446	0.00185788	0.00179291	0.784193	0.000826478	0.000714362	0.805212	-0.248925	0.000481525	-0.222905	0.00183401
327	10025909628	NM_173525	C11orf42	2.73356	0.0170604	0.0226077	0.897299	0.000969589	0.00122237	0.888976	0.000617266	0.000552654	0.904775	-0.23311	0.00103962	-0.206985	0.00369238
328	10025909769	NM_152998	EZH2	2.81517	0.0194183	0.0263086	1.23532	0.00152552	0.00147814	1.23358	0.00718063	0.00116634	1.18649	0.217055	0.00218595	0.25807	0.000250891
329	10025909824	NM_015435	RNF19A	4.137	0.00157642	0.00114047	1.19782	0.000623226	0.000602782	1.17793	0.00088799	0.000233948	1.1586	0.212856	0.00468226	0.244123	0.00113112
330	10025909884	NM_018420	SLC22A15	3.00337	0.00305313	0.0107268	1.33202	0.000749946	0.00250191	1.25765	0.00209117	0.00620312	1.20988	0.237392	0.000782525	0.194851	0.00607322
331	10025909942	NM_021963	NAP1L2	2.63533	0.0194733	0.00536418	0.780634	0.00818491	0.00400621	0.790833	0.0406445	0.0237885	0.851826	-0.195925	0.00592091	-0.225916	0.00145324
332	10025910007	NM_178496	C3orf59	3.26833	0.039989	0.0433834	0.880711	0.00143105	0.00321889	0.846203	0.00537199	0.00929391	0.874238	-0.241053	0.000732801	-0.225262	0.00163446
333	10025910095	NM_152219	GJD3	1.6352	0.010767	0.0119822	0.777536	0.00354934	0.000681043	0.723546	0.0164972	0.00779057	0.808064	-0.198828	0.00521028	-0.219325	0.00201097
334	10025910127	NM_005098	MSC	1.94884	0.0111628	0.00958979	1.21588	0.00414747	0.00182939	1.1983	0.000720859	0.00041616	1.19638	0.216199	0.00227804	0.238335	0.000744526
335	10025910244	NM_015713	RRM2B	3.56066	0.0250158	0.0467242	1.19736	0.000469148	0.000655591	1.23954	0.00277704	0.00296605	1.18081	0.206521	0.00359509	0.199648	0.00491221
336	10025910366	NM_018397	CHDH	2.21466	0.0564154	0.0250242	0.942987	0.0343803	0.0194154	0.946701	0.0073787	0.00501943	0.945202	-0.20072	0.00468186	-0.199219	0.00500731
337	10025910392	NM_016081	PALLD	4.48087	0.0409406	0.118305	1.16186	0.0027706	0.00609511	1.18841	0.00105125	0.00264966	1.18075	0.200347	0.00476092	0.211698	0.0028234
338	10025910492	NM_001856	COL16A1	3.98507	0.0117424	0.0237945	0.878434	0.000263751	0.00110608	0.862691	0.0117217	0.00735253	0.906134	-0.204916	0.00446	-0.203506	0.00474788
339	10025910532	NM_080825	C20orf144	4.11979	0.103443	0.0585209	0.849489	0.0102745	0.00691176	0.829813	0.00355291	0.00201219	0.839711	-0.213876	0.00254622	-0.207189	0.00348584
340	10025910598	NM_182563	C16orf79	2.77404	0.0074538	0.0133661	0.917318	0.00251281	0.00267917	0.922227	0.0177512	0.0149529	0.941888	-0.219059	0.00198326	-0.196734	0.00559096
341	10025910616	NM_015003	GOLGA8A	2.92712	0.00445408	0.0141097	1.46747	0.00112766	0.00158763	1.51532	0.00610793	0.00378668	1.39735	0.223912	0.00156142	0.224944	0.00148305
342	10025910622	NM_032539	SLITRK2	3.0908	9.53078e-05	0.000318229	1.40607	2.13385e-05	3.58224e-05	1.38856	0.000751555	0.000213742	1.28628	0.236525	0.000927363	0.234587	0.00102432
343	10025910667	NM_153226	TMEM20	2.8135	0.0110881	0.0214915	1.36921	0.00475228	0.00572032	1.32569	0.00290114	0.00422394	1.29544	0.202271	0.00446721	0.199359	0.00508892
344	10025910672	NM_013306	SNX15	3.83403	0.0745378	0.127728	0.917007	0.00349975	0.00375014	0.891412	0.0109884	0.00779057	0.908486	-0.18682	0.00857254	-0.204781	0.00389431
345	10025910691	NM_003116	SPAG4	2.30672	0.0172792	0.015707	0.922619	0.00187004	0.00487256	0.903555	0.00105226	0.00241911	0.911273	-0.227277	0.00131899	-0.238716	0.000729667
346	10025910692	NM_133457	EMID2	2.52432	0.00905699	0.0119822	0.920616	0.00174129	0.00381535	0.920605	0.00830263	0.00367963	0.937163	-0.1969	0.00579899	-0.224346	0.00161622
347	10025910765	NM_138698	C4orf21	2.24261	0.0145243	0.00349885	1.29649	0.00425607	0.00127965	1.27373	0.00819063	0.00633436	1.22125	0.213893	0.00254422	0.199046	0.00504603
348	10025910767	NM_133170	PTPRT	2.62341	0.00274855	0.00447589	1.44197	0.00337553	0.0093993	1.32411	0.00855792	0.0120954	1.26453	0.233311	0.000998347	0.188923	0.00800333
349	10025910771	NM_001184	ATR	2.44589	0.00195134	0.000465274	1.44461	0.000842571	0.000843465	1.37275	0.000855148	0.00134909	1.32848	0.286932	4.5538e-05	0.237853	0.000788073
350	10025910818	NM_145647	WDR67	2.6372	0.0280414	0.0141097	1.16751	0.00316644	0.00114733	1.17407	0.00203365	0.000511825	1.16108	0.202169	0.00438568	0.22973	0.00116448
351	10025910934	NM_017975	ZWILCH	2.62898	0.0107073	0.0126574	1.26531	0.000235736	0.000184059	1.33768	0.0150799	0.00283557	1.22534	0.200944	0.00463494	0.216639	0.00223033
352	10025911089	NM_138715	MSR1	3.34653	0.0225948	0.0336191	1.33991	0.00126833	0.00137562	1.40568	0.00811177	0.000303447	1.35785	0.207745	0.00339712	0.297245	2.21782e-05
353	10025911092	NM_017549	EPDR1	4.75191	0.0112309	0.0126574	1.19026	0.003353	0.00572032	1.18041	0.00214553	0.00512785	1.16985	0.219124	0.00203076	0.210149	0.00311301
354	10025911180	NM_001049	SSTR1	2.44622	0.00476217	0.00396007	0.946599	0.00102526	0.000325024	0.943793	0.0145005	0.00247496	0.958017	-0.212525	0.00278468	-0.26008	0.000231973
355	10025911209	NM_033424	MYH7B	2.33065	0.00106734	0.00196976	0.804708	0.00712735	0.00400621	0.856927	0.0198069	0.0146705	0.887228	-0.193926	0.00645928	-0.202535	0.00441437
356	10025911306	NM_000601	HGF	2.45343	0.06414	0.0932803	1.21908	0.00146455	0.00203246	1.30803	0.0190377	0.013073	1.21487	0.185996	0.00887472	0.196445	0.0056626
357	10025911317	NM_015294	TRIM37	3.80965	0.204513	0.200545	1.07926	0.00669342	0.00574201	1.13171	0.00245661	0.00250083	1.12516	0.197868	0.00634824	0.202156	0.00527722
358	10025911410	NM_013339	ALG6	3.29245	0.0362363	0.0971277	1.14056	0.000337183	0.00153196	1.21886	0.00594979	0.0114052	1.15357	0.221688	0.00179179	0.194716	0.00624144
359	10025911596	NM_153244	C10orf111	2.57298	0.000577688	0.00107783	1.48787	0.000801861	0.00132686	1.38048	1.92523e-05	4.8995e-05	1.41134	0.318711	5.29629e-06	0.330389	2.25237e-06
360	10025911605	NM_033136	FGF1	2.8969	0.0241027	0.0320318	1.3231	0.0312824	0.0340655	1.26815	0.00488335	0.00702864	1.29769	0.236385	0.000825105	0.241555	0.000627155
361	10025912142	NM_018379	FAM63A	3.58854	0.0145276	0.0163951	0.866623	0.000796318	0.00118387	0.863337	0.00699097	0.00867885	0.895024	-0.20298	0.00432659	-0.208695	0.00333086
362	10025912217	NM_139280	ORMDL3	4.37839	0.00437242	0.000993609	0.771227	0.00564635	0.00137043	0.820239	0.00384402	0.000964224	0.832366	-0.227767	0.00176852	-0.238397	0.00105008
363	10025912271	NM_002890	RASA1	4.023	0.0126618	0.00720334	1.18258	0.000583827	0.000263631	1.21371	0.00270122	0.00105047	1.16499	0.214197	0.0029257	0.256768	0.000336286
364	10025912304	NM_015163	TRIM9	2.87216	0.0325679	0.0290491	1.12137	0.00699663	0.012762	1.12393	0.00269157	0.00582582	1.12315	0.231174	0.00114768	0.21865	0.00213423
365	10025912496	NM_145659	IL27	4.28829	0.0557449	0.0352732	0.797667	0.00607353	0.00317371	0.792675	0.00236136	0.00105822	0.80662	-0.22069	0.00188163	-0.209586	0.00319582
366	10025912504	NM_015596	KLK13	2.50755	0.00392741	0.0141097	0.920276	9.87053e-05	0.000562549	0.913926	0.0037905	0.00460613	0.940102	-0.219231	0.00196669	-0.193202	0.00652556
367	10025912513	NM_020792	NCEH1	3.80525	0.0139894	0.0237945	1.57932	0.00140214	0.00387627	1.53639	0.00350082	0.00128454	1.45308	0.256796	0.000269845	0.272429	0.000107548
368	10025912524	NM_144643	SCLT1	2.71606	0.0238274	0.0535347	1.21017	0.000297785	0.00114733	1.26295	0.00358784	0.00480878	1.19508	0.196502	0.00564847	0.184236	0.00955195
369	10025912640	NM_015512	DNAH1	2.67783	0.00230777	0.00239307	0.88564	0.00639921	0.00387627	0.910703	0.0088129	0.00480878	0.925438	-0.234654	0.000903295	-0.187715	0.00825493
370	10025912679	NM_173582	PGM2L1	3.34963	0.0217531	0.0124193	1.24308	0.000701606	0.000327587	1.2888	0.00604671	0.00159758	1.20339	0.206419	0.00369952	0.199199	0.00512525
371	10025912693	NM_032166	ATRIP	4.2543	0.097555	0.0790958	0.805401	0.00818378	0.00345206	0.777839	0.00648254	0.00179178	0.805723	-0.205461	0.00415087	-0.199404	0.00543272
372	10025912845	NM_175894		2.27709	0.00111163	0.0003438	1.43562	0.0177177	0.00735587	1.25011	0.00259602	0.000637174	1.28206	0.192934	0.00674239	0.225785	0.00146282
373	10025912892	NM_005084	PLA2G7	3.67279	0.0751167	0.0823509	1.63001	0.0159443	0.0207932	1.59834	0.00904363	0.00327963	1.55193	0.211979	0.00386801	0.250318	0.000610154
374	10025913065	NM_000092	COL4A4	2.57876	0.00204909	0.00505179	2.06979	0.00124633	0.00142598	1.86154	0.000302672	0.000232041	1.84306	0.239017	0.000718082	0.26553	0.000162537
375	10025913113	NM_020739	CCPG1	3.3734	0.00581604	0.00645924	1.22916	1.66893e-05	2.73585e-05	1.27033	0.000390351	0.000438631	1.20375	0.229475	0.00140653	0.258306	0.000308748
376	10025913197	NM_016350	NIN	2.80031	0.00454348	0.00679565	1.21427	0.000984073	0.00110608	1.20518	0.00394332	0.00220704	1.16644	0.213722	0.00256499	0.253848	0.000318955
377	10025913495	HSS00013535		2.65727	0.00747794	0.00808525	0.925804	0.00376308	0.00300509	0.924384	0.00377601	0.00293583	0.930875	-0.192387	0.00690336	-0.218436	0.00209958
378	10025913529	HSS00128303		3.19671	0.000365555	0.0016126	0.810819	3.52263e-05	0.000133038	0.831262	0.0047394	0.00372154	0.887191	-0.262874	0.000494176	-0.27523	0.00025807
379	10025913545	XM_212378		2.61785	0.00747788	0.00679565	0.935667	0.000304878	0.000366211	0.920135	0.0025717	0.00225842	0.936488	-0.218871	0.00200153	-0.218738	0.00201454
380	10025913810	XM_212499		2.39094	0.0215797	0.0336191	0.937922	0.000893712	0.00350899	0.927285	0.00365293	0.00973278	0.94055	-0.252408	0.000345865	-0.228	0.00127161
381	10025913850	BC033347		2.49285	0.00166482	0.0014962	0.922041	0.000235617	0.000530481	0.929068	0.0209265	0.00747043	0.956794	-0.197364	0.0056823	-0.197651	0.00561106
382	10025914033	hCT1647579.3		2.28471	0.034193	0.00421083	0.86569	0.00983363	0.00118995	0.882937	0.0163637	0.00992912	0.9096	-0.237296	0.000786518	-0.204605	0.00392576
383	10025914043	XM_117290		2.60275	0.0175931	0.0489086	0.942036	0.00266421	0.00998348	0.933112	0.00305343	0.00470644	0.937093	-0.203493	0.00413006	-0.192979	0.00658896
384	10025914159	HSS00001209	C8orf68	2.30071	0.0393583	0.0638865	0.930925	0.00305182	0.00487256	0.916131	0.00296694	0.00404382	0.924599	-0.204784	0.00389381	-0.209684	0.0031038
385	10025914257	BC015721		2.35448	0.0250399	0.0696523	0.937602	0.0069052	0.0358594	0.934842	0.00253308	0.002532	0.927534	-0.218362	0.00210708	-0.202053	0.00451132
386	10025914387	hCT2299322	BMPER	3.33148	0.000436306	0.000816941	1.45857	0.000358224	0.00099045	1.38753	0.0013358	0.00346702	1.27943	0.221093	0.00179524	0.203429	0.00414202
387	10025914466	HSS00082803		2.31348	0.0304789	0.0784081	0.928913	0.00135511	0.00270861	0.90251	0.0133272	0.0132312	0.931628	-0.188819	0.00820345	-0.20839	0.00346165
388	10025914562	hCT1776373.2		2.12728	0.0109671	0.00856149	1.19545	0.00113523	0.000681043	1.21637	0.0045504	0.000427127	1.18246	0.202013	0.00451941	0.281788	6.30265e-05
389	10025914700	XM_071173		2.73449	0.012191	0.0101441	0.930481	0.00284469	0.00258911	0.932845	0.0461122	0.0205407	0.957583	-0.194115	0.0062713	-0.187986	0.00816087
390	10025914775	XM_089384	TTC24	2.61807	0.00017941	0.000202656	0.928034	3.91006e-05	4.45247e-05	0.931105	0.000839651	0.000133872	0.945837	-0.29969	1.88297e-05	-0.318856	4.95586e-06
391	10025915026	HSS00247726		2.46489	0.00900638	0.0101441	0.939031	0.00105977	0.00277203	0.940128	0.00658297	0.00582403	0.954883	-0.199505	0.00494371	-0.196622	0.0056187
392	10025915143	AL050227	PTGER3	4.36571	0.00732422	0.00856149	1.24459	0.00172812	0.00137258	1.24584	0.00207615	0.00314313	1.20298	0.200436	0.00485059	0.186961	0.00869317
393	10025915354	hCT2288641		2.5092	0.00963903	0.0141097	0.939979	0.00291878	0.00503242	0.942209	0.00683111	0.00747734	0.950608	-0.207928	0.00336847	-0.195107	0.00600539
394	10025915817	AF086191		3.61855	0.00438535	0.0042364	1.28326	0.0796035	0.0779334	1.12741	0.0108327	0.0105153	1.16127	0.186345	0.00909872	0.193838	0.00662372
395	10025915854	HSS00183336		2.15869	0.00563693	0.00604182	0.775616	0.0010885	0.00123405	0.807295	0.00077033	0.000346363	0.834329	-0.222558	0.00167004	-0.2251	0.00147156
396	10025916241	hCT1954065.1		2.47771	0.0314445	0.0574334	0.939322	0.00132138	0.00280434	0.92605	0.00460786	0.00459105	0.938595	-0.23324	0.00100198	-0.224015	0.00159751
397	10025916316	AK055761		2.69677	0.023413	0.0214915	0.926968	0.00199086	0.00286782	0.909022	0.00417894	0.00535107	0.921568	-0.219738	0.00191859	-0.211624	0.00283336
398	10025916393	hCT1814441		1.58457	0.00255841	0.00536418	0.628553	0.00534171	0.0154139	0.728507	0.018124	0.0150785	0.786076	-0.234405	0.00100279	-0.187094	0.00899673
399	10025916414	XM_168944		2.64731	0.0109775	0.0263086	0.926002	0.000519037	0.00132686	0.914502	0.0259194	0.0120954	0.943104	-0.188139	0.00810795	-0.184235	0.00955226
400	10025916475	HSS00344216	MAPKAPK3	2.81225	0.000346661	0.000939012	0.766766	0.000528157	0.000497043	0.812396	0.00636059	0.00341201	0.865545	-0.206903	0.00379659	-0.233571	0.00104657
401	10025916495	AK095905	ADAMTS5	3.99545	0.0039618	0.00856149	1.26685	0.000268936	0.000366211	1.28771	0.000936151	0.000461698	1.23156	0.203987	0.00403807	0.212389	0.00273269
402	10025916802	hCT2282993	FAM108A5	3.8555	0.0242972	0.0264188	0.901979	0.00118941	0.00219428	0.880819	0.0127724	0.019779	0.915629	-0.206109	0.00384318	-0.196637	0.0058658
403	10025917019	HSS00049192		2.26572	0.0363398	0.0467242	0.940344	0.00170225	0.00375014	0.922324	0.00480944	0.00763249	0.933935	-0.219297	0.00196037	-0.187149	0.0084546
404	10025917669	HSS00381520		2.7035	0.00098151	0.00210255	0.87684	8.33273e-05	0.000276864	0.884834	0.00502074	0.00138032	0.91778	-0.197952	0.0052976	-0.228941	0.00121229
405	10025918054	hCT1833278.1	2012-09-11	3.01489	0.0296631	0.0921273	0.654828	0.00099957	0.00678676	0.626249	0.00136155	0.0027585	0.675892	-0.232562	0.00153472	-0.194544	0.00831582
406	10025918291	AK057317		2.51595	0.00625038	0.00808525	0.895006	0.000729978	0.000853658	0.893751	0.0197836	0.00732499	0.925551	-0.197893	0.00531145	-0.213395	0.00260528
407	10025918334	HSS00375914		2.69537	0.01321	0.019385	0.920532	0.0036391	0.00590503	0.920972	0.10176	0.0775948	0.958924	-0.20648	0.00368915	-0.193126	0.00668692
408	10025918543	AF086167		2.89564	0.0343429	0.0726919	0.948176	0.000483632	0.000500977	0.934178	0.00733155	0.00387073	0.948053	-0.203094	0.00420572	-0.187869	0.00820138
409	10025918892	AK091332	GNB4	3.93918	0.0248184	0.0574334	1.16837	0.000673294	0.00217766	1.20048	0.00919992	0.00979161	1.14022	0.187355	0.00926277	0.197501	0.00603474
410	10025919228	BC039332	AGFG1	3.90644	0.004794	0.00604182	1.20127	0.000444889	0.00054127	1.1937	0.00134587	0.0014137	1.15678	0.183516	0.00984171	0.21107	0.00290822
411	10025919265	XM_212466		2.70653	0.0130243	0.019385	0.948314	0.00130898	0.00375014	0.941608	0.0195363	0.0115214	0.957137	-0.193985	0.00644278	-0.190898	0.00735855
412	10025919313	hCT2283962		3.01319	0.0199897	0.0406581	1.18914	0.00385606	0.00782543	1.17249	0.0278444	0.0128222	1.12079	0.187615	0.00845776	0.187616	0.0084572
413	10025919365	AJ489592	GLYCAM1	2.29802	0.00782734	0.015707	0.912717	0.000404656	0.000853658	0.896861	0.00968784	0.00310195	0.929447	-0.207988	0.00344158	-0.229237	0.00122955
414	10025919514	hCT2295728		2.7131	0.00833446	0.0276495	0.897914	0.000400543	0.00127965	0.89291	0.0131193	0.00535107	0.921659	-0.207475	0.00343993	-0.199694	0.00490204
415	10025919572	hCT2333502		2.62163	0.000165462	0.000496149	0.856112	9.77516e-06	4.86374e-05	0.864279	0.00170541	0.000355601	0.905724	-0.249221	0.000413041	-0.276664	8.30079e-05
416	10025919597	BC024931	OOEP	2.73563	0.0106226	0.0237945	0.746132	0.00024122	0.00054127	0.71833	0.000132382	0.00039494	0.7524	-0.208972	0.00320869	-0.225954	0.00140989
417	10025919633	HSS00178328	NEK6	2.598	0.0487052	0.183817	0.945526	0.0013361	0.00807017	0.924952	0.00322199	0.00898153	0.936904	-0.204367	0.004063	-0.189063	0.00795593
418	10025919864	XM_210210	FAM99A	2.62905	0.00294119	0.00856149	0.891632	0.000462413	0.000792086	0.903079	0.00569725	0.00317204	0.929084	-0.234137	0.00092793	-0.241187	0.000639649
419	10025919886	AK027041		2.1789	0.00284564	0.00224352	0.920694	0.0174928	0.00203246	0.9223	0.014115	0.00370437	0.933732	-0.237457	0.000779853	-0.225115	0.00147046
420	10025919909	hCT1643705.4		2.70962	0.000242352	0.0004614	0.795086	0.00436914	0.00669891	0.866905	0.00155246	0.00159198	0.873187	-0.205997	0.0037717	-0.20155	0.00461454
421	10025920056	HSS00015890		2.34917	0.00440538	0.00906265	0.930582	0.0306877	0.00164515	0.952251	0.107754	0.0220941	0.969516	-0.196531	0.00564119	-0.226476	0.00137331
422	10025920111	BC033582		2.59847	0.00609452	0.0214915	0.923954	0.00157195	0.00414014	0.920539	0.0213393	0.010129	0.941533	-0.185647	0.0091842	-0.186822	0.00874386
423	10025920398	XM_174468		2.90903	0.0185327	0.0292575	0.937984	0.000916302	0.00158876	0.923282	0.0138985	0.00820082	0.944339	-0.207182	0.00384024	-0.204205	0.00439173
424	10025920589	BC034289		2.49098	0.00812405	0.0148894	0.911928	0.000575423	0.00142598	0.912811	0.00731546	0.00339103	0.933814	-0.226542	0.00136876	-0.232969	0.000985905
425	10025920624	AF086466		3.18539	0.0194517	0.0361965	0.924566	0.00310707	0.00246841	0.920116	0.00917506	0.00380498	0.934252	-0.216908	0.00326956	-0.194726	0.00843463
426	10025920650	HSS00089947		2.67702	0.00628287	0.00856149	0.922609	0.00079143	0.00132686	0.921206	0.0186451	0.00570238	0.947443	-0.197172	0.00560556	-0.192461	0.00688128
427	10025920766	XM_116461		2.35454	0.0473121	0.0790958	0.938396	0.00146961	0.00481951	0.914538	0.00917924	0.0163727	0.934437	-0.187671	0.00860851	-0.197665	0.00560769
428	10025920964	AJ431610		2.4944	0.0140181	0.0263086	0.923905	0.000735819	0.00203246	0.913029	0.03677	0.0349008	0.947198	-0.209572	0.00311996	-0.184946	0.00927339
429	10025921974	hCT2281256		2.67223	0.0148686	0.00720334	1.33943	0.00498861	0.00536645	1.32422	0.0442501	0.0164378	1.229	0.192228	0.00680647	0.189542	0.0076385
430	10025922168	HSS00015806		2.44963	0.00553203	0.0237945	0.917559	0.000843108	0.00387627	0.914251	0.00748724	0.00501943	0.933495	-0.19279	0.00678457	-0.194544	0.00628835
431	10025922286	hCT2258252		3.10481	0.0230429	0.0361965	1.12079	0.000597298	0.000899732	1.14421	0.00365215	0.00533104	1.10403	0.220341	0.00219196	0.209971	0.00355251
432	10025922305	hCT1825163.1	hCG_1786132	2.46103	0.0130687	0.0107268	0.927048	0.000626683	0.000584602	0.920906	0.00702786	0.00376272	0.938719	-0.237193	0.000841726	-0.225836	0.00150116
433	10025922416	hCT1780139.1		3.37049	0.0206153	0.0336191	1.25958	0.0102115	0.00858021	1.24406	0.00560999	0.00431669	1.2366	0.184654	0.00938696	0.233066	0.000980991
434	10025922590	HSS00337509		3.05615	0.00232351	0.00511026	1.23492	0.018831	0.0097177	1.13003	0.000741482	0.000339329	1.17067	0.206809	0.00390574	0.235822	0.000961494
435	10025922728	HSS00217040		2.44985	0.00783294	0.0133661	1.35925	0.00350869	0.0134167	1.30778	0.00228012	0.00558305	1.28618	0.234871	0.00089312	0.18917	0.00776058
436	10025922872	XM_211559		2.4307	0.109549	0.118305	0.960914	0.0011344	0.00110608	0.934182	0.00313908	0.00108439	0.941949	-0.191153	0.00712938	-0.209753	0.00309378
437	10025923131	HSS00046440		2.95556	0.00429583	0.00781411	1.29063	0.0100802	0.0197331	1.18618	0.000758886	0.00107896	1.20755	0.278302	8.16836e-05	0.278792	7.92593e-05
438	10025923248	BC039475		2.67357	0.00311351	0.00421083	0.932648	0.00110763	0.00132686	0.944947	0.0175559	0.0116313	0.961464	-0.22735	0.00131413	-0.225443	0.00144644
439	10025923323	XM_060528		2.10466	0.00580823	0.00640875	0.924251	0.00156546	0.00258911	0.923468	0.0021441	0.00128454	0.926772	-0.243916	0.000570696	-0.272102	0.000114268
440	10025923386	HSS00346478		1.96842	0.0147045	0.00720334	0.872251	0.00277185	0.00241733	0.87942	0.00115371	0.00103271	0.891469	-0.232683	0.00103112	-0.266462	0.00015995
441	10025923643	HSS00047998	ADH4	2.62653	0.00513923	0.0174612	0.895273	0.000441015	0.00147814	0.894599	0.0400356	0.0304139	0.94064	-0.185652	0.00900376	-0.19036	0.00737611
442	10025923675	HSS00266591		2.63888	0.0710061	0.271332	0.95035	0.00160056	0.00645977	0.926622	0.00874209	0.00546241	0.942735	-0.184254	0.00973153	-0.186377	0.0089085
443	10025923761	hCT29954.3	CNGA2	2.08528	0.0160978	0.0174612	0.930223	0.00403327	0.00225604	0.931433	0.0475534	0.0579867	0.958881	-0.241355	0.000633923	-0.212831	0.00267606
444	10025923914	BC025345	hCG_2018279	2.17638	0.00725436	0.00720334	0.898224	0.0015735	0.00217909	0.897169	0.00262773	0.00688458	0.917004	-0.220671	0.00183283	-0.191096	0.0071468
445	10025924029	AK057935		2.76989	0.00586563	0.0119822	0.804491	0.000848532	0.00142598	0.817422	0.00151044	0.000827253	0.833871	-0.202956	0.00423208	-0.213448	0.00259877
446	10025924043	HSS00252354		2.09406	0.0358954	0.0511779	0.885406	0.0378224	0.0483984	0.898298	0.00667709	0.00717545	0.887986	-0.183313	0.00992486	-0.185262	0.00915168
447	10025924203	hCT1971322.1		4.16564	0.0121161	0.0527934	1.2338	0.000976563	0.00345904	1.24705	0.00412464	0.0104147	1.19521	0.2185	0.00266196	0.208214	0.00424184
448	10025924204	AL832823	HS3ST3B1	2.33552	0.0014838	0.00271988	0.883714	6.81281e-05	0.000208259	0.880239	0.00267237	0.00159198	0.906914	-0.229823	0.00115894	-0.2419	0.000615665
449	10025924299	hCT1795674.2		2.3168	0.00214946	0.00328708	0.915995	0.0037232	0.00328207	0.928931	0.013334	0.010129	0.945107	-0.23363	0.000952703	-0.237055	0.000796565
450	10025924582	BC037915		2.86747	0.010542	0.0214915	0.944174	0.000160813	0.00076282	0.933483	0.0048328	0.00779057	0.950284	-0.235524	0.000863174	-0.218798	0.0020087
451	10025924775	hCT1645818.3		2.81994	0.0249333	0.0406581	0.666809	0.000591338	0.00164515	0.6336	0.00167507	0.000582516	0.690128	-0.223412	0.00178924	-0.213173	0.00291516
452	10025924970	hCT1815076.2		2.47874	0.0442337	0.0726919	0.94831	0.00525123	0.00427806	0.943401	0.0126086	0.0105395	0.95127	-0.185893	0.00909062	-0.187546	0.00848221
453	10025925110	AK097508		2.4863	0.00381708	0.00447589	0.663775	0.00262815	0.00311035	0.713006	0.00223804	0.00105542	0.728547	-0.200159	0.00491094	-0.224193	0.00158343
454	10025925737	hCT1971397		2.60992	0.00395346	0.00372303	0.79598	0.00499451	0.00456655	0.84825	0.0137933	0.0233251	0.88119	-0.188761	0.00789677	-0.193745	0.00637314
455	10025926128	hCT2335078	OR10D3P	2.86371	0.00826865	0.0126574	0.926593	0.00208187	0.00296664	0.928968	0.0644999	0.0216964	0.956077	-0.184583	0.00941472	-0.189372	0.00769418
456	10025926434	hCT1644152.2		2.581	0.00205535	0.00396007	1.12918	0.0352489	0.0228983	1.07056	0.0367617	0.017067	1.06276	0.19785	0.00544065	0.189065	0.00795547
457	10025926530	Z36841		3.71697	0.0218914	0.0305092	1.27619	0.000407577	0.000792086	1.34087	0.00191188	0.00247496	1.25199	0.205877	0.00370331	0.255852	0.000284755
458	10025926669	XM_209264		2.54358	0.00762671	0.0126574	0.885395	0.0066427	0.00758743	0.90217	0.0168049	0.0237486	0.918368	-0.202207	0.00448015	-0.191554	0.00715463
459	10025926896	hCT2274079		2.42463	0.0875625	0.153837	0.946051	0.0006634	0.000981688	0.913666	0.00565577	0.00314313	0.935557	-0.195655	0.00599132	-0.223908	0.00160599
460	10025928008	HSS00181126		2.34345	0.00311869	0.00604182	0.92115	0.000926018	0.00296664	0.925968	0.00459647	0.00688458	0.940482	-0.250498	0.000384784	-0.222621	0.00166481
461	10025928118	hCT17791.3		2.77206	0.00512958	0.00856149	0.920893	0.000222206	0.000355244	0.90809	0.00299501	0.000979602	0.929106	-0.233785	0.000974174	-0.24138	0.000653828
462	10025928198	HSS00043706		1.94062	0.00552338	0.00447589	1.19195	0.00808662	0.00911886	1.1555	0.104483	0.0709777	1.08206	0.207683	0.00357601	0.189972	0.00781343
463	10025928355	hCT24308.3	FGD6	2.22612	0.00177902	0.00255168	1.33422	0.000784099	0.00286782	1.27692	0.00345868	0.00148267	1.21639	0.235134	0.000880943	0.243018	0.000579694
464	10025928837	hCT1647624.2		1.93723	0.0118632	0.00421083	0.891623	0.00649715	0.00339383	0.913833	0.00161248	0.00105822	0.909412	-0.239226	0.00071018	-0.267727	0.000142676
465	10025928846	AF075115		2.16063	0.00139421	0.00196976	0.858169	0.00175935	0.00127965	0.887209	0.00495541	0.00558305	0.912681	-0.230062	0.00114489	-0.219914	0.00190218
466	10025929019	hCT1826481.2		2.50199	0.03049	0.118305	0.931397	0.00684333	0.0283782	0.928722	0.00868761	0.00916427	0.933985	-0.195624	0.00626499	-0.192365	0.00720613
467	10025929083	XM_066371		2.79913	0.0124061	0.0369963	0.942895	0.000710607	0.00243908	0.9384	0.00909829	0.00420439	0.953804	-0.223001	0.00167972	-0.234611	0.000933407
468	10025929743	HSS00334772		2.81473	0.000971556	0.0013743	1.23603	0.0074901	0.00832242	1.1576	0.00576866	0.00523156	1.14725	0.202258	0.00457411	0.187194	0.00878213
469	10025929802	XM_061877		2.99579	0.0119823	0.0163951	0.942013	0.00477362	0.00485933	0.943241	0.0363384	0.00686067	0.958288	-0.189194	0.00807453	-0.195783	0.00608845
470	10025930300	hCT1970908.1		2.92554	0.00668132	0.00640875	0.794136	0.0023157	0.00182939	0.803366	0.0479887	0.0229084	0.875059	-0.190608	0.00729819	-0.194357	0.00620561
471	10025930552	XM_067296	OR5H6	2.32394	0.0249628	0.019385	0.930612	0.00331354	0.00427806	0.920159	0.0108504	0.0180506	0.940594	-0.196755	0.00558588	-0.18643	0.00871445
472	10025930623	BC012990		2.66616	0.00124496	0.00168949	0.891952	0.000367284	0.000434399	0.89956	0.0196759	0.00782698	0.935732	-0.251084	0.000385621	-0.219935	0.00195221
473	10025930900	XM_211544		2.56427	0.0083521	0.00679565	0.874934	0.00453293	0.00554079	0.895741	0.0144602	0.0183893	0.91674	-0.210825	0.00294197	-0.19252	0.00672105
474	10025930924	XM_085893		2.57993	0.0337214	0.101006	0.938814	0.000944436	0.00381535	0.912061	0.0162535	0.0176679	0.938218	-0.198019	0.0054002	-0.189992	0.00764817
475	10025930939	XM_093624		2.58472	0.014789	0.0264188	0.935834	0.000934899	0.00132299	0.932442	0.00193053	0.000931919	0.940632	-0.250568	0.000425357	-0.247976	0.000489938
476	10025931368	HSS00056352		2.5625	0.00127083	0.00289816	0.933469	0.000446737	0.00137562	0.943816	0.000984192	0.00324357	0.950529	-0.226216	0.00143164	-0.208138	0.00341777
477	10025931468	hCT1950466.1	C9orf102	2.55037	0.0186037	0.0352732	1.20373	0.00165254	0.00471729	1.20159	0.00126129	0.00387073	1.18463	0.209799	0.0031642	0.18912	0.0079369
478	10025931832	hCT2257174	B9D1	2.64272	0.0282903	0.0932803	0.954981	0.00827926	0.0199615	0.955855	0.00274622	0.00331652	0.95003	-0.193094	0.00683905	-0.20655	0.00376666
479	10025931998	AF070538		3.12416	0.00622874	0.0214483	0.851272	0.0012902	0.00654954	0.863752	0.0106907	0.00940543	0.898743	-0.199748	0.00523201	-0.207663	0.00366713
480	10025932139	AK097936		3.80498	0.0387065	0.0511779	0.728911	0.00203443	0.00252605	0.707559	0.00194794	0.000955522	0.745338	-0.223355	0.00169709	-0.204049	0.00421991
481	10025932150	XM_173298		2.67923	0.00593513	0.0113391	0.906159	0.000379682	0.000445783	0.901519	0.0106403	0.00393409	0.930136	-0.237604	0.000850048	-0.232494	0.00110566
482	10025932212	HSS00006658		2.28874	0.0226282	0.0535347	0.917357	0.0106578	0.0222826	0.924768	0.00360948	0.00607437	0.923926	-0.216013	0.00229861	-0.235995	0.000842185
483	10025932860	HSS00092307		2.6788	0.00929981	0.00693393	0.943524	0.000614226	0.00094527	0.932659	0.00161952	0.00171649	0.945601	-0.242126	0.000628274	-0.225879	0.00145596
484	10025932863	BC022570	C5orf40	1.56827	0.00624525	0.00988007	0.70441	0.00384206	0.00667006	0.713026	0.00337678	0.00397474	0.757888	-0.202802	0.00501277	-0.218932	0.00240726
485	10025932947	HSS00120918	MYEOV	1.93283	0.036994	0.0657684	1.17458	0.0101295	0.0176456	1.17945	0.000931144	0.00197268	1.20718	0.195295	0.00635462	0.190926	0.00766028
486	10025932952	HSS00060514	PUS1	2.4112	0.0195314	0.0352732	0.934024	0.000600338	0.00258911	0.918868	0.00103772	0.00331652	0.932328	-0.198211	0.00523714	-0.200383	0.00475322
487	10025933269	HSS00046815		1.63526	0.00832301	0.00350034	0.684554	0.00876057	0.0121065	0.759817	0.0269235	0.0532339	0.832174	-0.237091	0.000846215	-0.189608	0.00793474
488	10025933316	hCT2318100		2.47532	0.00286996	0.00958979	0.885211	0.000149667	0.00158763	0.884167	0.00143838	0.00174928	0.904091	-0.279898	6.79183e-05	-0.259334	0.000233303
489	10025933898	HSS00006293		2.63803	0.0150475	0.0184011	1.22434	0.0221153	0.0241742	1.16371	0.00262994	0.00660431	1.19494	0.197237	0.0054681	0.20697	0.00352119
490	10025933926	XM_212485		2.57027	0.0241764	0.0276495	0.939086	0.000846565	0.00227326	0.918797	0.00316292	0.00255817	0.919084	-0.218269	0.00217372	-0.208376	0.00346384
491	10025934095	HSS00097440		2.07418	0.0138762	0.0204146	0.878313	0.00273669	0.00099045	0.883034	0.00999725	0.00732499	0.913676	-0.211269	0.0028812	-0.201009	0.00462134
492	10025934200	AF264625		2.41677	0.0157006	0.0214915	0.934477	0.000534236	0.000607431	0.926509	0.00596625	0.00167602	0.942293	-0.188037	0.00830844	-0.223149	0.00166749
493	10025934229	AK026859		1.72263	0.00675553	0.00789386	0.564626	0.00447172	0.0276377	0.594914	0.0326946	0.0473153	0.709696	-0.256344	0.000477636	-0.193905	0.00872012
494	10025934269	HSS00141747		2.46841	0.0128324	0.0107268	0.943659	0.00129688	0.000734568	0.930751	0.00965023	0.001966	0.946801	-0.185292	0.00932096	-0.205584	0.0038438
495	10025934429	HSS00016570		2.24164	0.00374836	0.0113391	0.878406	0.00270963	0.000954509	0.89062	0.0505267	0.0237486	0.935521	-0.185987	0.00887821	-0.200405	0.00474853
496	10025934987	AK097857		2.46061	0.000586092	0.000615716	0.875579	0.00725544	0.00054127	0.904986	0.0594463	0.017067	0.941593	-0.203545	0.00412026	-0.19043	0.00735382
497	10025935315	hCT2323465		2.22395	0.042551	0.0790958	0.939634	0.00283748	0.00554079	0.925528	0.00685102	0.010129	0.940647	-0.218789	0.00200955	-0.206237	0.00364247
498	10025935422	XM_212464		2.27759	0.0125327	0.015707	0.929142	0.000191152	0.000338256	0.919823	0.00158197	0.00116634	0.934915	-0.218762	0.00201216	-0.239667	0.000693692
499	10025935472	hCT2282865	KIF6	2.18929	0.102713	0.0895562	0.952082	0.00356781	0.00368863	0.926043	0.00615424	0.00469261	0.937022	-0.188698	0.00807978	-0.196371	0.00580644
500	10025935508	HSS00124189		2.403	0.00514877	0.00239307	0.876833	0.000856161	0.000631094	0.877788	0.00105941	0.0014478	0.89464	-0.231418	0.00106801	-0.249913	0.000397488
501	10026391639	NM_020247	CABC1	4.30488	0.000959396	0.00174898	0.693725	0.000301242	0.000662625	0.736571	0.00397182	0.00679517	0.807616	-0.297664	9.35622e-05	-0.251151	0.00106097
502	10026394239	NM_002829	PTPN3	3.10825	0.0110583	0.0119822	0.790676	0.00366008	0.0064919	0.81169	0.00497443	0.00732499	0.834642	-0.195501	0.00603172	-0.204564	0.00402672
503	10026394716	NM_003615	SLC4A7	3.11234	0.0216544	0.00856149	1.16873	0.0014655	0.000463545	1.19173	0.00417572	0.00431669	1.15945	0.20385	0.00406336	0.208467	0.00328507
504	10029224577			2.48802	0.00963038	0.0184011	0.919592	9.29236e-05	0.000255346	0.904714	0.0133244	0.00717545	0.93871	-0.19864	0.0051381	-0.203535	0.00412224
505	10029224578			2.22304	0.0210705	0.0290491	0.927345	0.00183403	0.00250191	0.912215	0.00797278	0.01524	0.936829	-0.214573	0.00246294	-0.257712	0.000256089
506	10029224582			2.43302	0.00642586	0.00536418	0.902992	0.000409305	0.000562549	0.89865	0.0073483	0.00501943	0.929465	-0.234339	0.00091825	-0.220344	0.00186253
507	10029224599			3.90739	0.00222576	0.00604182	0.828123	8.37445e-05	0.000631094	0.828152	0.00408131	0.00491309	0.879781	-0.218287	0.00205926	-0.229754	0.00116308
508	10029224646			3.2708	0.00137454	0.00196976	0.855439	6.82473e-05	0.000199914	0.857865	0.00802189	0.00346702	0.906826	-0.228442	0.00124337	-0.233861	0.000941371
509	10029224691			2.4476	0.0095467	0.015707	0.927856	0.00017339	0.000265896	0.910657	0.001656	0.00210756	0.928045	-0.21244	0.00272603	-0.215057	0.00240653
510	10029224701			2.40501	0.002253	0.00196976	0.938626	0.0167632	0.000562549	0.948693	0.12654	0.0173895	0.967956	-0.192153	0.00682865	-0.232158	0.00102811
511	10029224729			3.3369	0.0094769	0.0305092	0.8973	0.000892878	0.00400621	0.896035	0.0263858	0.00795156	0.930454	-0.18805	0.00813858	-0.194008	0.00630082
512	10029224868			3.71903	0.0107787	0.0204146	0.891376	0.000202477	0.00054127	0.872735	0.00700808	0.00480878	0.908977	-0.202994	0.00422478	-0.224165	0.00154189
513	10029224889			2.53169	0.0234119	0.0352732	0.940547	0.00175351	0.00210464	0.930872	0.00355572	0.00290012	0.939162	-0.206177	0.00365257	-0.207763	0.00339429
514	10031919718	NM_001001712	LCN10	2.24061	0.000898421	0.00107783	0.912445	0.00402027	0.00189495	0.917961	0.000926793	0.000643849	0.919235	-0.215006	0.00241245	-0.232743	0.000997498
515	10031919818	NM_001002760	BPY2B	2.12637	0.00504232	0.00505179	0.913695	0.00360262	0.00998348	0.927044	0.0154994	0.0470979	0.944721	-0.239999	0.000681571	-0.19267	0.00667759
516	10031919824	hCT6221		4.54093	0.140251	0.297046	0.922031	0.0340615	0.0720984	0.913232	0.00100648	0.0027017	0.883425	-0.190589	0.00844006	-0.198493	0.00604447
517	10031919844	NM_206922	CRIP3	2.44083	0.0253894	0.0559815	0.95098	0.00415158	0.0168758	0.946394	0.00240243	0.00491309	0.945961	-0.194105	0.00627419	-0.186897	0.00854487
518	10031919885	ENST00000331285	PCYT2	3.23337	0.00012368	0.000319183	0.750703	0.0010559	0.00296664	0.808594	0.0133405	0.0141199	0.855005	-0.209283	0.00316239	-0.195237	0.00597122
519	10031919886	ENST00000310480		2.09624	0.0140413	0.0406581	0.897888	0.00142699	0.00267917	0.874285	0.0307201	0.0309461	0.923021	-0.183238	0.00995584	-0.187431	0.00835465
520	10031919940	ENST00000312608	IGHD	2.44536	0.00783706	0.00505179	0.78473	0.00448561	0.000822365	0.780998	0.00504297	0.00201219	0.81724	-0.191731	0.00695417	-0.242948	0.000581882
521	10031919983	AF527831	TTTY19	1.89729	0.00341827	0.00396007	0.895707	0.000605583	0.00127965	0.894875	0.0150003	0.0309461	0.931558	-0.25868	0.000242258	-0.262331	0.000196092
522	10031920033	NM_203426		2.51386	3.14116e-05	0.000108421	0.793703	0.000155807	0.000366211	0.855276	0.0401264	0.0349008	0.918803	-0.208009	0.00335575	-0.187509	0.00832727
523	10031920040	ENST00000328215	MRGPRE	3.80491	0.0492039	0.066718	0.734415	0.00303984	0.00669891	0.707377	0.001679	0.00188774	0.728935	-0.199157	0.00561626	-0.189114	0.00861213
524	10031920057	NM_214461	C2orf27B	2.80582	0.00235134	0.00141406	0.82267	0.00033468	0.000155866	0.825444	0.00942016	0.00582403	0.885852	-0.214413	0.00254648	-0.226069	0.00144222
525	10031920184	NM_003163		1.82045	0.0283091	0.0467242	0.858929	0.00287855	0.00445116	0.841499	0.024749	0.00820082	0.882945	-0.1914	0.00750791	-0.225355	0.00158159
526	10031920237	ENST00000275393		2.10374	0.0120699	0.0204146	0.892486	0.00252187	0.00375014	0.882039	0.0102934	0.0138515	0.914542	-0.201527	0.00451482	-0.208014	0.00335496
527	10031920293	hCT2346577		2.33279	0.00340897	0.00808525	0.921235	0.000223279	0.00054127	0.910423	0.00408566	0.00546592	0.934412	-0.243347	0.00058846	-0.241962	0.000633806
528	10031920326	NM_207469	DEFB132	3.29355	0.00607169	0.00355059	0.37097	0.0256467	0.01768	0.530557	0.0317572	0.033895	0.596317	-0.195429	0.00659748	-0.192721	0.00740339
529	10031920386	AK095541	DNAJA1	2.58831	0.00766581	0.0184011	0.943434	0.00043577	0.00258911	0.932164	0.00656182	0.00916427	0.947826	-0.19619	0.0058525	-0.183989	0.00983857
530	10031920435	NM_001004136	OR2T2	4.03867	0.0308325	0.0467242	0.739898	0.00163233	0.00286782	0.72714	0.00185466	0.00119489	0.760158	-0.218567	0.00203137	-0.20848	0.00328303
531	10031920678	ENST00000296096	TCF23	2.45773	0.0672997	0.0932803	0.952194	0.00142127	0.00250191	0.92085	0.00105834	0.000384748	0.92122	-0.191754	0.00694713	-0.185645	0.00900619
532	10031920761	ENST00000313410		2.68048	0.0760785	0.132654	0.940952	0.00236416	0.00350899	0.916937	0.00592083	0.00259018	0.925657	-0.186217	0.00879295	-0.221938	0.00172204
533	10031920857	CR749513		1.98681	0.0185108	0.00172698	0.882492	0.00558704	0.000226021	0.889963	0.007954	0.000787079	0.910965	-0.257058	0.000275721	-0.298373	2.16014e-05
534	10033668432	NM_032803	SLC7A3	2.49015	0.0171228	0.0263086	0.910109	0.00212538	0.00339383	0.906893	0.0336185	0.00763249	0.934929	-0.185715	0.00915819	-0.19812	0.0053762
535	10033668438	NM_000617	SLC11A2	3.57416	0.00720292	0.00447589	1.2177	0.00968611	0.0159447	1.15583	0.0178032	0.00546592	1.13065	0.192278	0.00738628	0.213781	0.00283364
536	10033668440	NM_003615	SLC4A7	3.35488	0.0432979	0.0237945	1.13878	0.00233263	0.00164515	1.17108	0.00485027	0.00620312	1.14752	0.188082	0.00812768	0.204864	0.0038795
537	10033668486	NM_020038	ABCC3	3.50622	0.00908876	0.0174612	1.64271	0.00493896	0.0130317	1.48648	0.00075829	0.0014137	1.50422	0.268573	0.000146875	0.258013	0.000270899
538	10033668538	NM_018663	PXMP2	3.44765	5.01275e-05	0.000108421	0.771456	0.000875235	0.00137532	0.822582	0.00599015	0.00295162	0.857968	-0.224171	0.00192892	-0.241654	0.000808283
539	10033668579	NM_018976	SLC38A2	4.4527	0.0113478	0.0376411	1.20747	0.000193357	0.000632465	1.23521	0.000873744	0.0017972	1.18594	0.2332	0.00163011	0.22619	0.00226421
540	10033668608			2.79006	0.00249398	0.00475597	0.911826	0.00029099	0.00137258	0.913033	0.0119309	0.00961262	0.940483	-0.22804	0.00130623	-0.192268	0.00693887
541	10033668653	NM_003645	SLC27A2	2.06923	0.00757569	0.0141097	0.694273	0.00207913	0.00350899	0.736905	0.00193596	0.00523841	0.776992	-0.260599	0.000216864	-0.218473	0.00204064
542	10033668680	NM_020247	CABC1	4.2386	0.00026685	0.000474095	0.674057	0.000111341	0.000311375	0.731187	0.00145024	0.00294459	0.795398	-0.305903	4.48631e-05	-0.2584	0.000620527
543	10033668696	D00174	SERPINF2	2.65827	0.0109691	0.00640875	0.903066	0.000905991	0.000463545	0.900436	0.0117247	0.00225842	0.927621	-0.229403	0.00121926	-0.221558	0.00180329
544	10033668774	NM_003977	AIP	3.53665	0.031556	0.0320318	0.813322	0.00082624	0.00158763	0.786592	0.000598788	0.000694454	0.814286	-0.219283	0.00196176	-0.210169	0.00303408
545	10033668796	NM_002889	RARRES2	3.93447	0.0424985	0.0477968	0.782248	0.0182428	0.0126446	0.798991	0.00680471	0.00417662	0.796133	-0.194049	0.00730339	-0.221826	0.00209868
546	10033668937	NM_001004	RPLP2	4.87674	0.0156595	0.0204146	0.853631	0.00442851	0.00442016	0.860708	0.00174403	0.00310195	0.862377	-0.205358	0.00388357	-0.210132	0.00311555
